# Supplementary material for: Comparative Transcriptomic Exploration Reveals Unique Molecular Adaptations of Neuropathogenic Trichobilharzia to Invade and Parasitize Its Avian Definitive Host
Source: PLoS Negl Trop Dis. 2016 Feb 10;10(2):e0004406. doi: 10.1371/journal.pntd.0004406 (PMC4749378; doi:10.1371/journal.pntd.0004406)
Supplement: S5 Table — Transcription level established based on RNA-Seq by Expectation Maximization (RSEM) analysis. Sorted in descending order based on “expected counts” for the schistosomula stage. Differential transcripts are marked with an asterisk. (XLSX) [file pntd.0004406.s005.xlsx]

## Sheet:  S5
S5 Table. Transcripts of Trichobilharzia regenti predicted to encode excretory/secretory (ES) proteins, annotated using the National Center for Biotechnology Information (NCBI) database. Transcription level established based on RNA-Seq by Expectation Maximization (RSEM) analysis. Sorted in descending order based on “expected counts” for the schistosomula stage. Differential transcripts are marked…
Transcript ID	NCBI annotation	Accession number of homologue	e-value	Expected,Counts,Cercariae,	Expected Counts Schistosomula	Up-regulated in cercariae	Up-regulated in schistosomula
Treg_000011	hypothetical protein [Schistosoma japonicum]	gi|226469038|emb|CAX69998.1|	7e-21	36576.2	16923.8	*
Treg_006200	SJCHGC07500 protein [Schistosoma japonicum]	gi|76157529|gb|AAX28424.2|	1e-12	18.5	15257		*
Treg_006350	saposin containing protein [Schistosoma mansoni]gi|350646286|emb|CCD59012.1| saposin containing protein [Schistosoma mansoni]	gi|256070311|ref|XP_002571486.1|	0	952	11923		*
Treg_007215	No hit			0	7386.25		*
Treg_001756	No hit			986.5	6294.75
Treg_000933	Saposin-like,IPR008139 Saposin B,domain-containing protein [Schistosoma japonicum]	gi|226473346|emb|CAX71359.1|	9e-64	354.553	6168.82		*
Treg_006625	No hit			263.5	4386.25		*
Treg_006851	peptidase M26 [Gemella haemolysans]gi|241864336|gb|EER68714.1| Gram-positive signal peptide protein, YSIRK family [Gemella haemolysans ATCC 10379]	gi|489236049|ref|WP_003144328.1|	3e-13	0	3719.53
Treg_000011	low-density lipoprotein receptor (ldl) [Schistosoma mansoni]gi|360044928|emb|CCD82476.1| low-density lipoprotein receptor (ldl) [Schistosoma mansoni]	gi|256083737|ref|XP_002578095.1|	0	2456	3714		*
Treg_007404	SJCHGC06223 protein [Schistosoma japonicum]	gi|56752609|gb|AAW24518.1|	3e-178	3	3514.75
Treg_002285	No hit			185	3509.5		*
Treg_007183	No hit			1.5	3285.36		*
Treg_006310	No hit			2	3025.25		*
Treg_006418	No hit			3.5	3017
Treg_007052	No hit			0.25	2482.25		*
Treg_007271	No hit			193	2325.75		*
Treg_007622	SJCHGC06307 protein [Schistosoma japonicum]gi|119655849|gb|ABL86192.1| unknown [Schistosoma japonicum]gi|226470498|emb|CAX70529.1| hypotheticial protein [Schistosoma japonicum]gi|226470500|emb|CAX70530.1| hypotheticial protein [Schistosoma japonicum]	gi|56756963|gb|AAW26653.1|	8e-133	4465	2191.75	*	*
Treg_007182	SJCHGC06635 protein [Schistosoma japonicum]	gi|56753800|gb|AAW25097.1|	2e-33	2.5	1987.96		*
Treg_000100	basigin related [Schistosoma mansoni]gi|353231396|emb|CCD77814.1| basigin related [Schistosoma mansoni]	gi|256078884|ref|XP_002575723.1|	5e-171	2494.25	1833.25	*
Treg_007160	egf-like domain protein [Schistosoma mansoni]	gi|360044944|emb|CCD82492.1|	0.0	5.75	1773.75
Treg_007807	No hit			885.25	1767		*
Treg_007418	No hit			42.4575	1734.72
Treg_007122	hypothetical protein [Schistosoma mansoni]	gi|256070224|ref|XP_002571443.1|	2e-102	239.5	1529.5		*
Treg_006421	No hit			54.455	1313.43
Treg_004666	No hit			26.1675	1059.31		*
Treg_006900	No hit			34.75	986.25
Treg_007274	subfamily A1A unassigned peptidase (A01 family) [Schistosoma mansoni]gi|360043457|emb|CCD78870.1| subfamily A1A unassigned peptidase (A01 family) [Schistosoma mansoni]	gi|256074029|ref|XP_002573329.1|	7e-135	0	864.25		*
Treg_007039	No hit			0.25	832.023		*
Treg_000200	hypothetical protein [Schistosoma mansoni]	gi|256074503|ref|XP_002573564.1|	6e-70	1565.75	798.5	*	*
Treg_006885	No hit			0	747.135
Treg_004012	hypothetical protein [Schistosoma mansoni]gi|353231410|emb|CCD77828.1| hypothetical protein Smp_004710 [Schistosoma mansoni]	gi|256071204|ref|XP_002571931.1|	2e-36	1328.5	732.25	*	*
Treg_000367	No hit			613.445	699.258
Treg_003767	putative macroglobulin/complement [Schistosoma mansoni]	gi|353228487|emb|CCD74658.1|	0.0	530.53	690.482
Treg_007527	signaling protein wnt4 precursor [Schistosoma japonicum]	gi|110348933|gb|ABG73038.1|	0.0	108.25	642.75
Treg_006400	No hit			44.5	553.5
Treg_001333	SJCHGC04172 protein [Schistosoma japonicum]	gi|56753858|gb|AAW25126.1|	6e-48	1450.25	521	*	*
Treg_003003	SJCHGC07559 protein [Schistosoma japonicum]	gi|56757731|gb|AAW27006.1|	1e-18	22.2	504.567
Treg_001412	putative collagen alpha chain [Schistosoma mansoni]	gi|353228555|emb|CCD74726.1|	0.0	98.975	469.592		*
Treg_000532	No hit			105.918	468.717
Treg_001454	SJCHGC06047 protein [Schistosoma japonicum]gi|226481387|emb|CAX73591.1| Reticulocalbin-1 precursor [Schistosoma japonicum]	gi|56758330|gb|AAW27305.1|	2e-148	168.25	443
Treg_007642	SJCHGC02459 protein [Schistosoma japonicum]	gi|56756346|gb|AAW26346.1|	7e-20	4.75	432
Treg_003926	hypothetical protein [Schistosoma mansoni]gi|350645996|emb|CCD59273.1| hypothetical protein Smp_149080 [Schistosoma mansoni]	gi|256080128|ref|XP_002576335.1|	0.0	308.5	426		*
Treg_007497	No hit			32	426
Treg_001520	putative ww domain-binding protein 2 (WBP-2) [Schistosoma mansoni]	gi|360043623|emb|CCD81169.1|	6e-143	353.5	415		*
Treg_008130	No hit			0	406.75
Treg_007041	No hit			0	402.637		*
Treg_003277	SPO-1 protein [Schistosoma mansoni]gi|4590342|gb|AAD26535.1|AF109180_1 stage-specific protein SPO-1 [Schistosoma mansoni]gi|3641363|gb|AAC36363.1| stathmin-like protein [Schistosoma mansoni]	gi|4588483|gb|AAD26122.1|AF109181_1	1e-25	8	388.75		*
Treg_007791	No hit			83	388.25		*
Treg_007380	No hit			74	337
Treg_002474	Chitinase domain-containing protein 1 precursor [Schistosoma japonicum]	gi|226466718|emb|CAX69494.1|	0.0	122.25	307.75
Treg_006164	No hit			0	297.322		*
Treg_006501	putative rgs-gaip interacting protein gipc [Schistosoma mansoni]	gi|353232944|emb|CCD80299.1|	0.0	19.75	283.25		*
Treg_001539	hypothetical protein [Schistosoma japonicum]	gi|226480866|emb|CAX73530.1|	1e-70	289.75	273.5
Treg_001623	No hit			761.75	240.25	*
Treg_001067	No hit			180.65	236.218
Treg_000663	No hit			657.25	217.25	*
Treg_007794	No hit			47.66	187.377
Treg_001072	hypothetical protein Smp_198890 [Schistosoma mansoni]	gi|350645220|emb|CCD60093.1|	1e-129	762.75	182	*
Treg_003832	No hit			66.0825	181.512
Treg_002409	No hit			53.155	142.178
Treg_000671	deleted in oral cancer 1/cdk2-associated protein-like [Schistosoma mansoni]gi|360042810|emb|CCD78220.1| deleted in oral cancer 1/cdk2-associated protein-like [Schistosoma mansoni]	gi|256076128|ref|XP_002574366.1|	2e-45	86.4525	139.482
Treg_001715	unnamed protein product [Schistosoma mansoni]	gi|353229362|emb|CCD75533.1|	5e-12	214.25	135.25
Treg_006644	E1b-55kD-associated protein [Schistosoma mansoni]	gi|256082622|ref|XP_002577553.1|	0.0	0	132.493		*
Treg_003861	No hit			63.615	126.683
Treg_001558	family C83 unassigned peptidase (C83 family) [Schistosoma mansoni]	gi|256052410|ref|XP_002569764.1|	0.0	47.21	115.203
Treg_004549	serine/threonine protein kinase [Schistosoma mansoni]gi|360043639|emb|CCD81185.1| serine/threonine kinase [Schistosoma mansoni]	gi|256077810|ref|XP_002575193.1|	9e-94	160.512	110.358	*
Treg_002444	hypothetical protein [Schistosoma mansoni]	gi|256070086|ref|XP_002571379.1|	5e-17	62.2475	89.12
Treg_006956	No hit			108.25	85
Treg_004201	No hit			450.91	79.57	*
Treg_006191	hypothetical protein Smp_170100 [Schistosoma mansoni]	gi|360044538|emb|CCD82086.1|	5e-78	25.66	73.8025
Treg_000007	No hit			9789.24	66.7525	*
Treg_004831	No hit			117.25	61.25
Treg_007893	No hit			0	54.28		*
Treg_008091	No hit			25.78	50.81
Treg_005442	No hit			33.6	49.035
Treg_005603	ribonuclease t2 [Schistosoma mansoni]	gi|256052335|ref|XP_002569728.1|	2e-84	34.09	38.28
Treg_001893	No hit			82.5	31.25	*
Treg_000012	hypothetical protein [Schistosoma japonicum]	gi|226469038|emb|CAX69998.1|	2e-14	139.72	29.4175	*
Treg_004227	No hit			16.9325	28.5425
Treg_002539	multiple inositol polyphosphate phosphatase-related [Schistosoma mansoni]	gi|350644164|emb|CCD61071.1|	0.0	41.5075	26.92	*
Treg_007892	venom allergen-like (VAL) protein 12 [Schistosoma mansoni]gi|82659455|gb|ABB88844.1| venom allergen-like protein 12 [Schistosoma mansoni]gi|360043477|emb|CCD78890.1| venom allergen-like (VAL) protein 12 [Schistosoma mansoni]	gi|256070802|ref|XP_002571731.1|	4e-13	0	23.4475		*
Treg_001082	No hit			450.75	22	*
Treg_006050	No hit			0	20.2475		*
Treg_002935	No hit			7.75	15.75
Treg_003111	site-1 peptidase (S08 family) [Schistosoma mansoni]	gi|353232791|emb|CCD80147.1|	5e-31	2.695	14.815
Treg_000948	No hit			2065.5	13	*
Treg_001356	putative ephrin receptor [Schistosoma mansoni]	gi|353228594|emb|CCD74765.1|	0.0	28.73	11.9625	*
Treg_003818	No hit			154.012	10.9475	*
Treg_007538	No hit			3.2125	6.35
Treg_001989	No hit			13.75	4
Treg_000786	hypothetical protein [Schistosoma mansoni]gi|350646242|emb|CCD59076.1| neuropeptide Y precursor,putative [Schistosoma mansoni]	gi|256083892|ref|XP_002578169.1|	2e-31	238	3.75	*
Treg_004470	SJCHGC09710 protein [Schistosoma japonicum]	gi|60699369|gb|AAX31007.1|	1e-08	9.5	3.75
Treg_003865	No hit			13.4275	1.855
Treg_002941	hypothetical protein [Schistosoma japonicum]	gi|226466774|emb|CAX69522.1|	4e-28	18.5	1.75
Treg_000486	No hit			301.75	1	*
Treg_000356	hypothetical protein [Schistosoma japonicum]gi|226472330|emb|CAX77201.1|	gi|226472322|emb|CAX77197.1|	4e-20	41	0.75	*
Treg_000097	No hit			32.725	0.5175	*
Treg_001179	hypothetical protein [Schistosoma mansoni]gi|353230920|emb|CCD77337.1| hypothetical protein Smp_045360.3 [Schistosoma mansoni]	gi|256079153|ref|XP_002575854.1|	1e-49	35.4	0.4075	*
Treg_000549	No hit			17.25	0.25	*
Treg_003201	No hit			2.25	0.25
Treg_000452	venom allergen-like protein 8 [Schistosoma mansoni]	gi|159792922|gb|ABW98681.1|	2e-45	10336.8	0	*
Treg_000878	No hit			868.185	0	*
Treg_000935	No hit			1.5	0
Treg_000941	No hit			2425.75	0	*
Treg_001061	hypothetical protein [Schistosoma mansoni]gi|360043535|emb|CCD78948.1| hypothetical protein Smp_177100 [Schistosoma mansoni]	gi|256089463|ref|XP_002580829.1|	3e-12	33.5	0	*
Treg_001607	No hit			5.25	0
Treg_001849	chymotrypsin inhibitor precursor [Rhipicephalus microplus]	gi|194360417|gb|ACF57858.1|	6e-18	5.5	0
Treg_002290	No hit			104.5	0	*
Treg_002387	No hit			4.25	0
Treg_002472	No hit			31.75	0
Treg_002511	SJCHGC07515 protein [Schistosoma japonicum]	gi|56755984|gb|AAW26170.1|	4e-09	10	0
Treg_002830	No hit			29.25	0	*
Treg_003039	No hit			2.5	0
Treg_003062	No hit			20.75	0	*
Treg_003071	No hit			27	0
Treg_003136	No hit			13.25	0	*
Treg_003192	No hit			12.75	0
Treg_003195	No hit			2.5	0
Treg_003307	No hit			19.5	0	*
Treg_003340	No hit			8.75	0	*
Treg_003401	No hit			0	0
Treg_003406	No hit			1.25	0
Treg_003513	MEG 3.3 isoform 1 [Schistosoma mansoni]	gi|296244702|gb|ADH02209.1|	2e-16	14.25	0
Treg_003936	No hit			666.5	0	*
Treg_004032	No hit			187	0	*
Treg_004721	No hit			89.25	0	*
Treg_004856	SJCHGC08498 protein [Schistosoma japonicum]	gi|76157197|gb|AAX28195.2|	4e-20	1.6725	0
Treg_004933	No hit			2	0
Treg_005918	homeobox protein knotted-1 [Schistosoma mansoni]gi|353230922|emb|CCD77339.1| putative homeobox protein knotted-1 [Schistosoma mansoni]	gi|256079151|ref|XP_002575853.1|	2e-60	0	0
