# Supplementary material for: Comparative Transcriptomic Exploration Reveals Unique Molecular Adaptations of Neuropathogenic Trichobilharzia to Invade and Parasitize Its Avian Definitive Host
Source: PLoS Negl Trop Dis. 2016 Feb 10;10(2):e0004406. doi: 10.1371/journal.pntd.0004406 (PMC4749378; doi:10.1371/journal.pntd.0004406)
Supplement: S7 Table — (XLSX) [file pntd.0004406.s007.xlsx]

## Sheet: S7
S7 Table. Transcripts uniquely transcribed in either the cercaria or schistosomulum of Trichobilharzia regenti, classified using the Kyoto Encyclopedia of Genes and Genomes (KEGG) database.
	Cercariae							Schistosomula
KEGG classification	No. Kterms	No. Transcripts	Representative	Transcript ID		KEGG classification	No. Kterms	No. Transcripts	Representative	Transcript ID
Metabolism						Metabolism
KEGG pathways						KEGG pathways
Amino acid metabolism;Alanine, aspartate and glutamate metabolism (path:ko00250)	1	1	alanine transaminase [EC:2.6.1.2]	Treg_000412		Amino acid metabolism;Alanine, aspartate and glutamate metabolism (path:ko00250)	1	1	L-asparaginase [EC:3.5.1.1]	Treg_007450
Amino acid metabolism;Arginine and proline metabolism (path:ko00330)	1	1	creatine kinase [EC:2.7.3.2]	Treg_003590		Amino acid metabolism;Glycine, serine and threonine metabolism (path:ko00260)	1	1	primary-amine oxidase [EC:1.4.3.21]	Treg_010924
Amino acid metabolism;Lysine degradation (path:ko00310)	1	1	histone-lysine N-methyltransferase SETDB [EC:2.1.1.43]	Treg_005575		Amino acid metabolism;Lysine degradation (path:ko00310)	2	2	histone-lysine N-methyltransferase SETD1 [EC:2.1.1.43]	Treg_006252
Carbohydrate metabolism;Butanoate metabolism (path:ko00650)	1	1	pyruvate dehydrogenase E1 component subunit alpha [EC:1.2.4.1]	Treg_003703					histone-lysine N-methyltransferase SETD2 [EC:2.1.1.43]	Treg_007947
Carbohydrate metabolism;Citrate cycle (TCA cycle) (path:ko00020)	1	1	pyruvate dehydrogenase E1 component subunit alpha [EC:1.2.4.1]	Treg_003703		Amino acid metabolism;Arginine and proline metabolism (path:ko00330)	1	1	diamine oxidase [EC:1.4.3.22]	Treg_013130
Carbohydrate metabolism;Glycolysis / Gluconeogenesis (path:ko00010)	1	1	pyruvate dehydrogenase E1 component subunit alpha [EC:1.2.4.1]	Treg_003703		Amino acid metabolism;Histidine metabolism (path:ko00340)	1	1	diamine oxidase [EC:1.4.3.22]	Treg_013130
Carbohydrate metabolism;Inositol phosphate metabolism (path:ko00562)	1	1	phosphatidylinositol-4-phosphate 3-kinase [EC:2.7.1.154]	Treg_004471		Amino acid metabolism;Tyrosine metabolism (path:ko00350)	1	1	primary-amine oxidase [EC:1.4.3.21]	Treg_010924
Carbohydrate metabolism;Pyruvate metabolism (path:ko00620)	1	1	pyruvate dehydrogenase E1 component subunit alpha [EC:1.2.4.1]	Treg_003703		Amino acid metabolism;Phenylalanine metabolism (path:ko00360)	1	1	primary-amine oxidase [EC:1.4.3.21]	Treg_010924
Energy metabolism;Carbon fixation in photosynthetic organisms (path:ko00710)	1	1	alanine transaminase [EC:2.6.1.2]	Treg_000412		Amino acid metabolism;Tryptophan metabolism (path:ko00380)	2	2	arylformamidase [EC:3.5.1.9]	Treg_012829
Energy metabolism;Oxidative phosphorylation (path:ko00190)	1	1	NADH dehydrogenase (ubiquinone) Fe-S protein 3 [EC:1.6.5.3 1.6.99.3]	Treg_020644					diamine oxidase [EC:1.4.3.22]	Treg_013130
Nucleotide metabolism;Purine metabolism (path:ko00230)	1	1	3',5'-cyclic-nucleotide phosphodiesterase [EC:3.1.4.17]	Treg_005596		Biosynthesis of other secondary metabolites;Phenylpropanoid biosynthesis (path:ko00940)	1	1	beta-glucosidase [EC:3.2.1.21]	Treg_009334
KEGG protein class						Biosynthesis of other secondary metabolites;Isoquinoline alkaloid biosynthesis (path:ko00950)	1	1	primary-amine oxidase [EC:1.4.3.21]	Treg_010924
Amino acid related enzymes (br:ko01007)	1	1	alanine transaminase [EC:2.6.1.2]	Treg_000412		Biosynthesis of other secondary metabolites;Tropane, piperidine and pyridine alkaloid biosynthesis (path:ko00960)	1	1	primary-amine oxidase [EC:1.4.3.21]	Treg_010924
Heparan sulfate/heparin binding proteins (br:ko00536)	1	1	tissue factor pathway inhibitor	Treg_001831		Carbohydrate metabolism;Pyruvate metabolism (path:ko00620)	2	2	pyruvate dehydrogenase E1 component subunit alpha [EC:1.2.4.1]	Treg_000209
Peptidases (br:ko01002)	5	6	endothelin-converting enzyme [EC:3.4.24.71]	Treg_002038					pyruvate kinase [EC:2.7.1.40]	Treg_006480
			endothelin-converting enzyme [EC:3.4.24.71]	Treg_002039		Carbohydrate metabolism;Glyoxylate and dicarboxylate metabolism (path:ko00630)	1	1	arylformamidase [EC:3.5.1.9]	Treg_012829
			sentrin-specific protease 7 [EC:3.4.22.68]	Treg_005280		Carbohydrate metabolism;Butanoate metabolism (path:ko00650)	1	1	pyruvate dehydrogenase E1 component subunit alpha [EC:1.2.4.1]	Treg_000209
			tripeptidyl-peptidase II [EC:3.4.14.10]	Treg_020885		Carbohydrate metabolism;Amino sugar and nucleotide sugar metabolism (path:ko00520)	1	21	hexosaminidase [EC:3.2.1.52]	Treg_006008
			ubiquitin carboxyl-terminal hydrolase 9/24 [EC:3.1.2.15]	Treg_005928					hexosaminidase [EC:3.2.1.52]	Treg_007118
			ubiquitin carboxyl-terminal hydrolase BAP1 [EC:3.4.19.12]	Treg_020767					hexosaminidase [EC:3.2.1.52]	Treg_008394
Protein kinases (br:ko01001)	6	7	AP2-associated kinase [EC:2.7.11.1]	Treg_005385					hexosaminidase [EC:3.2.1.52]	Treg_009625
			calcium/calmodulin-dependent protein kinase (CaM kinase) II [EC:2.7.11.17]	Treg_005877					hexosaminidase [EC:3.2.1.52]	Treg_009837
			cyclin-dependent kinase-like [EC:2.7.11.22]	Treg_005648					hexosaminidase [EC:3.2.1.52]	Treg_011272
			elongation factor 2 kinase [EC:2.7.11.20]	Treg_004373					hexosaminidase [EC:3.2.1.52]	Treg_013277
			elongation factor 2 kinase [EC:2.7.11.20]	Treg_004374					hexosaminidase [EC:3.2.1.52]	Treg_015078
			serine/threonine-protein kinase haspin [EC:2.7.11.1]	Treg_020224					hexosaminidase [EC:3.2.1.52]	Treg_015334
			serine/threonine-protein kinase TTK/MPS1 [EC:2.7.12.1]	Treg_005939					hexosaminidase [EC:3.2.1.52]	Treg_015335
Protein phosphatases and associated proteins (br:ko01009)	2	3	calmodulin	Treg_000214					hexosaminidase [EC:3.2.1.52]	Treg_015336
			calmodulin	Treg_003763					hexosaminidase [EC:3.2.1.52]	Treg_015398
			transmembrane protein 132	Treg_005806					hexosaminidase [EC:3.2.1.52]	Treg_015400
Proteoglycans (br:ko00535)	1	1	chondroitin sulfate proteoglycan 4	Treg_020562					hexosaminidase [EC:3.2.1.52]	Treg_015937
Transport system (br:ko02000)	3	3	MFS transporter, ACS family, solute carrier family 17 (sodium-dependent inorganic phosphate cotransporter), member 6/7/8	Treg_002243					hexosaminidase [EC:3.2.1.52]	Treg_015938
			mitochondrial import inner membrane translocase subunit TIM9	Treg_001764					hexosaminidase [EC:3.2.1.52]	Treg_016910
			solute carrier family 3 (neutral and basic amino acid transporter), member 1	Treg_004029					hexosaminidase [EC:3.2.1.52]	Treg_017067
Genetic Information Processing									hexosaminidase [EC:3.2.1.52]	Treg_020191
KEGG pathways									hexosaminidase [EC:3.2.1.52]	Treg_020246
Folding, sorting and degradation;RNA degradation (path:ko03018)	2	2	PAB-dependent poly(A)-specific ribonuclease subunit 3	Treg_005868					hexosaminidase [EC:3.2.1.52]	Treg_020390
			CCR4-NOT transcription complex subunit 9	Treg_020753					hexosaminidase [EC:3.2.1.52]	Treg_020391
						Carbohydrate metabolism;Citrate cycle (TCA cycle) (path:ko00020)	1	1	pyruvate dehydrogenase E1 component subunit alpha [EC:1.2.4.1]	Treg_000209
Folding, sorting and degradation;Ubiquitin mediated proteolysis (path:ko04120)	1	1	E3 ubiquitin-protein ligase NEDD4-like [EC:6.3.2.19]	Treg_005443		Carbohydrate metabolism;Galactose metabolism (path:ko00052)	1	1	beta-galactosidase [EC:3.2.1.23]	Treg_015412
Replication and repair;Fanconi anemia pathway (path:ko03460)	1	1	structure-specific endonuclease subunit SLX4 (BTB/POZ domain-containing protein 12)	Treg_020829		Carbohydrate metabolism;Glycolysis / Gluconeogenesis (path:ko00010)	2	2	pyruvate dehydrogenase E1 component subunit alpha [EC:1.2.4.1]	Treg_000209
Transcription;Spliceosome (path:ko03040)	1	1	apoptotic chromatin condensation inducer in the nucleus	Treg_000652					pyruvate kinase [EC:2.7.1.40]	Treg_006480
Translation;mRNA surveillance pathway (path:ko03015)	3	3	apoptotic chromatin condensation inducer in the nucleus	Treg_000652		Carbohydrate metabolism;Pentose phosphate pathway (path:ko00030)	1	1	ribose 5-phosphate isomerase A [EC:5.3.1.6]	Treg_011403
			cleavage and polyadenylation specificity factor subunit 1	Treg_005951		Carbohydrate metabolism;Inositol phosphate metabolism (path:ko00562)	4	5	1-phosphatidylinositol-4-phosphate 5-kinase [EC:2.7.1.68]	Treg_002501
			RNA-binding protein Musashi	Treg_005971					inositol-polyphosphate multikinase [EC:2.7.1.151]	Treg_002326
Translation;Ribosome (path:ko03010)	1	1	large subunit ribosomal protein L28	Treg_005520					phosphatidylinositol 4-kinase [EC:2.7.1.67]	Treg_004134
Translation;RNA transport (path:ko03013)	2	2	apoptotic chromatin condensation inducer in the nucleus	Treg_000652					phosphatidylinositol-bisphosphatase [EC:3.1.3.36]	Treg_006067
			tRNA nucleotidyltransferase (CCA-adding enzyme) [EC:2.7.7.72 3.1.3.- 3.1.4.-]	Treg_004552					phosphatidylinositol-bisphosphatase [EC:3.1.3.36]	Treg_006069
KEGG protein class						Carbohydrate metabolism;Starch and sucrose metabolism (path:ko00500)	1	1	beta-glucosidase [EC:3.2.1.21]	Treg_009334
Chaperones and folding catalysts (br:ko03110)	1	1	tripeptidyl-peptidase II [EC:3.4.14.10]	Treg_020885		Energy metabolism;Carbon fixation in photosynthetic organisms (path:ko00710)	1	1	ribose 5-phosphate isomerase A [EC:5.3.1.6]	Treg_011403
Chromosome (br:ko03036)	7	8	amyotrophic lateral sclerosis 2 protein	Treg_005767		Glycan biosynthesis and metabolism;Glycosphingolipid biosynthesis - globo series (path:ko00603)	1	21	hexosaminidase [EC:3.2.1.52]	Treg_006008
			calmodulin	Treg_000214					hexosaminidase [EC:3.2.1.52]	Treg_007118
			calmodulin	Treg_003763					hexosaminidase [EC:3.2.1.52]	Treg_008394
			centrosomal protein CEP164	Treg_012256					hexosaminidase [EC:3.2.1.52]	Treg_009625
			histone-lysine N-methyltransferase SETDB [EC:2.1.1.43]	Treg_005575					hexosaminidase [EC:3.2.1.52]	Treg_009837
			polycystin 2	Treg_004619					hexosaminidase [EC:3.2.1.52]	Treg_011272
			serine/threonine-protein kinase haspin [EC:2.7.11.1]	Treg_020224					hexosaminidase [EC:3.2.1.52]	Treg_013277
			serine/threonine-protein kinase TTK/MPS1 [EC:2.7.12.1]	Treg_005939					hexosaminidase [EC:3.2.1.52]	Treg_015078
			amyotrophic lateral sclerosis 2 protein	Treg_005767					hexosaminidase [EC:3.2.1.52]	Treg_015334
DNA repair and recombination proteins (br:ko03400)	1	1	structure-specific endonuclease subunit SLX4 (BTB/POZ domain-containing protein 12)	Treg_020829					hexosaminidase [EC:3.2.1.52]	Treg_015335
Exosome (br:ko04147)	2	3	calmodulin	Treg_000214					hexosaminidase [EC:3.2.1.52]	Treg_015336
			calmodulin	Treg_003763					hexosaminidase [EC:3.2.1.52]	Treg_015398
			creatine kinase [EC:2.7.3.2]	Treg_003590					hexosaminidase [EC:3.2.1.52]	Treg_015400
Transcription factors (br:ko03000)	4	5	forkhead box protein A2, hepatocyte nuclear factor 3-beta	Treg_010645					hexosaminidase [EC:3.2.1.52]	Treg_015937
			forkhead box protein K	Treg_000395					hexosaminidase [EC:3.2.1.52]	Treg_015938
			growth factor independent 1	Treg_000153					hexosaminidase [EC:3.2.1.52]	Treg_016910
			growth factor independent 1	Treg_000154					hexosaminidase [EC:3.2.1.52]	Treg_017067
			serum response factor	Treg_003267					hexosaminidase [EC:3.2.1.52]	Treg_020191
Transcription machinery (RNA polymerase) (br:ko03021)	1	1	cleavage and polyadenylation specificity factor subunit 1	Treg_005951					hexosaminidase [EC:3.2.1.52]	Treg_020246
Transfer RNA biogenesis (br:ko03016)	1	1	tRNA nucleotidyltransferase (CCA-adding enzyme) [EC:2.7.7.72 3.1.3.- 3.1.4.-]	Treg_004552					hexosaminidase [EC:3.2.1.52]	Treg_020390
Ubiquitin system (br:ko04121)	6	6	E3 ubiquitin-protein ligase NEDD4-like [EC:6.3.2.19]	Treg_005443					hexosaminidase [EC:3.2.1.52]	Treg_020391
			F-box and WD-40 domain protein 9	Treg_017922		Glycan biosynthesis and metabolism;Glycosaminoglycan degradation (path:ko00531)	2	22	beta-galactosidase [EC:3.2.1.23]	Treg_015412
			sentrin-specific protease 7 [EC:3.4.22.68]	Treg_005280					hexosaminidase [EC:3.2.1.52]	Treg_006008
			structure-specific endonuclease subunit SLX4 (BTB/POZ domain-containing protein 12)	Treg_020829					hexosaminidase [EC:3.2.1.52]	Treg_007118
			ubiquitin carboxyl-terminal hydrolase 9/24 [EC:3.1.2.15]	Treg_005928					hexosaminidase [EC:3.2.1.52]	Treg_008394
			ubiquitin carboxyl-terminal hydrolase BAP1 [EC:3.4.19.12]	Treg_020767					hexosaminidase [EC:3.2.1.52]	Treg_009625
Environmental Information Processing									hexosaminidase [EC:3.2.1.52]	Treg_009837
KEGG pathways									hexosaminidase [EC:3.2.1.52]	Treg_011272
Signaling molecules and interaction;Neuroactive ligand-receptor interaction (path:ko04080)	3	3	glycine receptor alpha-3	Treg_005984					hexosaminidase [EC:3.2.1.52]	Treg_013277
			metabotropic glutamate receptor 2/3	Treg_005021					hexosaminidase [EC:3.2.1.52]	Treg_015078
			benzodiazapine receptor	Treg_014772					hexosaminidase [EC:3.2.1.52]	Treg_015334
Signal transduction;Calcium signaling pathway (path:ko04020)	2	3	calcium/calmodulin-dependent protein kinase (CaM kinase) II [EC:2.7.11.17]	Treg_005877					hexosaminidase [EC:3.2.1.52]	Treg_015335
			calmodulin	Treg_000214					hexosaminidase [EC:3.2.1.52]	Treg_015336
			calmodulin	Treg_003763					hexosaminidase [EC:3.2.1.52]	Treg_015398
Signal transduction;ErbB signaling pathway (path:ko04012)	1	1	calcium/calmodulin-dependent protein kinase (CaM kinase) II [EC:2.7.11.17]	Treg_005877					hexosaminidase [EC:3.2.1.52]	Treg_015400
Signal transduction;HIF-1 signaling pathway (path:ko04066)	2	2	calcium/calmodulin-dependent protein kinase (CaM kinase) II [EC:2.7.11.17]	Treg_005877					hexosaminidase [EC:3.2.1.52]	Treg_015937
			pyruvate dehydrogenase E1 component subunit alpha [EC:1.2.4.1]	Treg_003703					hexosaminidase [EC:3.2.1.52]	Treg_015938
									hexosaminidase [EC:3.2.1.52]	Treg_016910
Signal transduction;MAPK signaling pathway (path:ko04010)	2	2	serum response factor	Treg_003267					hexosaminidase [EC:3.2.1.52]	Treg_017067
			beta-arrestin	Treg_002218					hexosaminidase [EC:3.2.1.52]	Treg_020191
Signal transduction;Phosphatidylinositol signaling system (path:ko04070)	2	3	phosphatidylinositol-4-phosphate 3-kinase [EC:2.7.1.154]	Treg_004471					hexosaminidase [EC:3.2.1.52]	Treg_020246
			calmodulin	Treg_000214					hexosaminidase [EC:3.2.1.52]	Treg_020390
			calmodulin	Treg_003763					hexosaminidase [EC:3.2.1.52]	Treg_020391
Signal transduction;Rap1 signaling pathway (path:ko04015)	1	2	calmodulin	Treg_000214		Glycan biosynthesis and metabolism;N-Glycan biosynthesis (path:ko00510)	1	1	alpha-1,3-glucosyltransferase [EC:2.4.1.265]	Treg_017389
			calmodulin	Treg_003763		Glycan biosynthesis and metabolism;Glycosylphosphatidylinositol(GPI)-anchor biosynthesis (path:ko00563)	1	1	phosphatidylinositol glycan, class K [EC:2.6.-.-]	Treg_017313
Signal transduction;Ras signaling pathway (path:ko04014)	1	2	calmodulin	Treg_000214		Glycan biosynthesis and metabolism;Glycosphingolipid biosynthesis - ganglio series (path:ko00604)	2	22	beta-galactosidase [EC:3.2.1.23]	Treg_015412
			calmodulin	Treg_003763					hexosaminidase [EC:3.2.1.52]	Treg_006008
Signal transduction;Wnt signaling pathway (path:ko04310)	1	1	calcium/calmodulin-dependent protein kinase (CaM kinase) II [EC:2.7.11.17]	Treg_005877					hexosaminidase [EC:3.2.1.52]	Treg_007118
KEGG protein class									hexosaminidase [EC:3.2.1.52]	Treg_008394
Cell adhesion molecules and their ligands (br:ko04516)	2	2	chondroitin sulfate proteoglycan 4	Treg_020562					hexosaminidase [EC:3.2.1.52]	Treg_009625
			limbic system-associated membrane protein	Treg_001340					hexosaminidase [EC:3.2.1.52]	Treg_009837
G protein-coupled receptors (br:ko04030)	1	1	metabotropic glutamate receptor 2/3	Treg_005021					hexosaminidase [EC:3.2.1.52]	Treg_011272
Ion channels (br:ko04040)	3	3	glycine receptor alpha-3	Treg_005984					hexosaminidase [EC:3.2.1.52]	Treg_013277
			polycystin 2	Treg_004619					hexosaminidase [EC:3.2.1.52]	Treg_015078
			transient receptor potential cation channel subfamily M member 3	Treg_005825					hexosaminidase [EC:3.2.1.52]	Treg_015334
									hexosaminidase [EC:3.2.1.52]	Treg_015335
Mitochondrial biogenesis (br:ko03029)	2	2	huntingtin	Treg_005584					hexosaminidase [EC:3.2.1.52]	Treg_015336
			mitochondrial import inner membrane translocase subunit TIM9	Treg_001764					hexosaminidase [EC:3.2.1.52]	Treg_015398
Cellular Processes									hexosaminidase [EC:3.2.1.52]	Treg_015400
KEGG pathways									hexosaminidase [EC:3.2.1.52]	Treg_015937
Cell growth and death;Cell cycle (path:ko04110)	1	1	serine/threonine-protein kinase TTK/MPS1 [EC:2.7.12.1]	Treg_005939					hexosaminidase [EC:3.2.1.52]	Treg_015938
Cell growth and death;Cell cycle - yeast (path:ko04111)	1	1	serine/threonine-protein kinase TTK/MPS1 [EC:2.7.12.1]	Treg_005939					hexosaminidase [EC:3.2.1.52]	Treg_016910
Cell growth and death;Oocyte meiosis (path:ko04114)	2	3	calcium/calmodulin-dependent protein kinase (CaM kinase) II [EC:2.7.11.17]	Treg_005877					hexosaminidase [EC:3.2.1.52]	Treg_017067
			calmodulin	Treg_000214					hexosaminidase [EC:3.2.1.52]	Treg_020191
			calmodulin	Treg_003763					hexosaminidase [EC:3.2.1.52]	Treg_020246
Transport and catabolism;Endocytosis (path:ko04144)	2	2	beta-arrestin	Treg_002218					hexosaminidase [EC:3.2.1.52]	Treg_020390
			E3 ubiquitin-protein ligase NEDD4-like [EC:6.3.2.19]	Treg_005443					hexosaminidase [EC:3.2.1.52]	Treg_020391
KEGG protein class						Glycan biosynthesis and metabolism;Other glycan degradation (path:ko00511)	2	22	beta-galactosidase [EC:3.2.1.23]	Treg_015412
Cytoskeleton proteins (br:ko04812)	1	1	tubulin polyglutamylase TTLL9 [EC:6.-.-.-]	Treg_001993					hexosaminidase [EC:3.2.1.52]	Treg_006008
Ribosome (br:ko03011)	1	1	large subunit ribosomal protein L28	Treg_005520					hexosaminidase [EC:3.2.1.52]	Treg_007118
Ribosome biogenesis (br:ko03009)	1	1	nucleolar pre-ribosomal-associated protein 1	Treg_005853					hexosaminidase [EC:3.2.1.52]	Treg_008394
Spliceosome (br:ko03041)	4	4	apoptotic chromatin condensation inducer in the nucleus	Treg_000652					hexosaminidase [EC:3.2.1.52]	Treg_009625
			CUG-BP- and ETR3-like factor	Treg_004115					hexosaminidase [EC:3.2.1.52]	Treg_009837
			RNA-binding protein 15	Treg_020431					hexosaminidase [EC:3.2.1.52]	Treg_011272
			RNA binding protein fox-1	Treg_005859					hexosaminidase [EC:3.2.1.52]	Treg_013277
									hexosaminidase [EC:3.2.1.52]	Treg_015078
									hexosaminidase [EC:3.2.1.52]	Treg_015334
									hexosaminidase [EC:3.2.1.52]	Treg_015335
									hexosaminidase [EC:3.2.1.52]	Treg_015336
									hexosaminidase [EC:3.2.1.52]	Treg_015398
									hexosaminidase [EC:3.2.1.52]	Treg_015400
									hexosaminidase [EC:3.2.1.52]	Treg_015937
									hexosaminidase [EC:3.2.1.52]	Treg_015938
									hexosaminidase [EC:3.2.1.52]	Treg_016910
									hexosaminidase [EC:3.2.1.52]	Treg_017067
									hexosaminidase [EC:3.2.1.52]	Treg_020191
									hexosaminidase [EC:3.2.1.52]	Treg_020246
									hexosaminidase [EC:3.2.1.52]	Treg_020390
									hexosaminidase [EC:3.2.1.52]	Treg_020391
						Lipid metabolism;Fatty acid degradation (path:ko00071)	1	1	carnitine O-palmitoyltransferase 2 [EC:2.3.1.21]	Treg_002560
						Lipid metabolism;Glycerophospholipid metabolism (path:ko00564)	2	4	cytosolic phospholipase A2 [EC:3.1.1.4]	Treg_008924
									cytosolic phospholipase A2 [EC:3.1.1.4]	Treg_008925
									lysophospholipase III [EC:3.1.1.5]	Treg_011040
									lysophospholipase III [EC:3.1.1.5]	Treg_017620
						Lipid metabolism;Ether lipid metabolism (path:ko00565)	1	2	cytosolic phospholipase A2 [EC:3.1.1.4]	Treg_008924
									cytosolic phospholipase A2 [EC:3.1.1.4]	Treg_008925
						Lipid metabolism;Arachidonic acid metabolism (path:ko00590)	2	3	cytosolic phospholipase A2 [EC:3.1.1.4]	Treg_008924
									cytosolic phospholipase A2 [EC:3.1.1.4]	Treg_008925
									cytosolic prostaglandin-E synthase [EC:5.3.99.3]	Treg_015039
						Lipid metabolism;Linoleic acid metabolism (path:ko00591)	1	2	cytosolic phospholipase A2 [EC:3.1.1.4]	Treg_008924
									cytosolic phospholipase A2 [EC:3.1.1.4]	Treg_008925
						Lipid metabolism;alpha-Linolenic acid metabolism (path:ko00592)	1	2	cytosolic phospholipase A2 [EC:3.1.1.4]	Treg_008924
									cytosolic phospholipase A2 [EC:3.1.1.4]	Treg_008925
						Lipid metabolism;Sphingolipid metabolism (path:ko00600)	1	1	beta-galactosidase [EC:3.2.1.23]	Treg_015412
						Metabolism of other amino acids;beta-Alanine metabolism (path:ko00410)	1	1	primary-amine oxidase [EC:1.4.3.21]	Treg_010924
						Metabolism of other amino acids;Cyanoamino acid metabolism (path:ko00460)	2	2	beta-glucosidase [EC:3.2.1.21]	Treg_009334
									L-asparaginase [EC:3.5.1.1]	Treg_007450
						Metabolism of other amino acids;Glutathione metabolism (path:ko00480)	1	1	glutathione S-transferase [EC:2.5.1.18]	Treg_012320
						Metabolism of cofactors and vitamins;Thiamine metabolism (path:ko00730)	1	1	cysteine desulfurase [EC:2.8.1.7]	Treg_009565
						Metabolism of cofactors and vitamins;Pantothenate and CoA biosynthesis (path:ko00770)	1	2	phosphopantothenate-cysteine ligase [EC:6.3.2.5]	Treg_002817
									phosphopantothenate-cysteine ligase [EC:6.3.2.5]	Treg_004802
						Metabolism of cofactors and vitamins;Porphyrin and chlorophyll metabolism (path:ko00860)	1	1	ferritin heavy chain [EC:1.16.3.1]	Treg_011723
						Nucleotide metabolism;Purine metabolism (path:ko00230)	4	4	3',5'-cyclic-nucleotide phosphodiesterase [EC:3.1.4.17]	Treg_005774
									adenosine deaminase [EC:3.5.4.4]	Treg_014928
									nucleoside-diphosphate kinase [EC:2.7.4.6]	Treg_018119
									pyruvate kinase [EC:2.7.1.40]	Treg_006480
						Nucleotide metabolism;Pyrimidine metabolism (path:ko00240)	1	1	nucleoside-diphosphate kinase [EC:2.7.4.6]	Treg_018119
						KEGG protein class
						Cellular antigens (br:ko04090)	1	1	sodium/potassium-transporting ATPase subunit beta	Treg_012553
						Glycosyltransferases (br:ko01003)	1	1	alpha-1,3-glucosyltransferase [EC:2.4.1.265]	Treg_017389
						Heparan sulfate/heparin binding proteins (br:ko00536)	2	6	cathepsin B [EC:3.4.22.1]	Treg_015294
									cathepsin B [EC:3.4.22.1]	Treg_015853
									cathepsin B [EC:3.4.22.1]	Treg_018303
									cathepsin B [EC:3.4.22.1]	Treg_020247
									collagen, type VI, alpha	Treg_008130
									collagen, type VI, alpha	Treg_018920
						Protein kinases (br:ko01001)	5	5	ataxia telangiectasia mutated family protein [EC:2.7.11.1]	Treg_018014
									CDC-like kinase [EC:2.7.12.1]	Treg_003727
									mitogen-activated protein kinase kinase kinase 5 [EC:2.7.11.25]	Treg_016517
									PI-3-kinase-related kinase SMG-1	Treg_015075
									serine/threonine-protein kinase TTK/MPS1 [EC:2.7.12.1]	Treg_005074
						Peptidases (br:ko01002)	9	19	cathepsin A (carboxypeptidase C) [EC:3.4.16.5]	Treg_013943
									cathepsin B [EC:3.4.22.1]	Treg_015294
									cathepsin B [EC:3.4.22.1]	Treg_015853
									cathepsin B [EC:3.4.22.1]	Treg_018303
									cathepsin B [EC:3.4.22.1]	Treg_020247
									cathepsin D [EC:3.4.23.5]	Treg_007039
									cathepsin D [EC:3.4.23.5]	Treg_007041
									cathepsin D [EC:3.4.23.5]	Treg_007274
									cathepsin D [EC:3.4.23.5]	Treg_009554
									cathepsin D [EC:3.4.23.5]	Treg_015703
									cathepsin D [EC:3.4.23.5]	Treg_017006
									cathepsin D [EC:3.4.23.5]	Treg_018267
									cysteine protease ATG4 [EC:3.4.22.-]	Treg_005749
									dipeptidyl-peptidase III [EC:3.4.14.4]	Treg_013803
									legumain [EC:3.4.22.34]	Treg_006584
									legumain [EC:3.4.22.34]	Treg_008970
									leishmanolysin-like peptidase [EC:3.4.24.-]	Treg_005807
									protease, serine, 7 (enterokinase) [EC:3.4.21.9]	Treg_019821
									ubiquitin carboxyl-terminal hydrolase 22/27/51 [EC:3.1.2.15]	Treg_005910
						Protein phosphatases and associated proteins (br:ko01009)	3	3	host cell factor	Treg_005450
									IKAROS family zinc finger protein	Treg_013095
									synaptotagmin-like protein	Treg_011743
						Transport system (br:ko02000)	6	7	ATP-binding cassette, subfamily C (CFTR/MRP), member 4	Treg_009652
									MFS transporter, DHA1 family, solute carrier family 18 (vesicular amine transporter), member 1/2	Treg_019173
									MFS transporter, PCFT/HCP family, solute carrier family 46 (folate transporter), member 1/3	Treg_013584
									MFS transporter, SP family, solute carrier family 2 (facilitated glucose transporter), member 1	Treg_009879
									solute carrier family 35 (probable UDP-sugar transporter), member A4	Treg_013796
									solute carrier family 7 (cationic amino acid transporter), member 1	Treg_010799
									solute carrier family 7 (cationic amino acid transporter), member 1	Treg_011940
						Ubiquitin system (br:ko04121)	13	13	anaphase-promoting complex subunit 5	Treg_005079
									breast cancer 2 susceptibility protein	Treg_012333
									E3 ubiquitin-protein ligase RNF146 [EC:6.3.2.19]	Treg_013214
									E3 ubiquitin-protein ligase ZSWIM2 [EC:6.3.2.19]	Treg_012707
									F-box and WD-40 domain protein 9	Treg_020547
									F-box protein 36	Treg_019874
									F-box protein 47	Treg_011075
									RING finger protein 121	Treg_009793
									transcriptional repressor NF-X1 [EC:6.3.2.-]	Treg_005685
									tripartite motif-containing protein 56 [EC:6.3.2.19]	Treg_005855
									ubiquitin carboxyl-terminal hydrolase 22/27/51 [EC:3.1.2.15]	Treg_005910
									ubiquitin-like 1-activating enzyme E1 B [EC:6.3.2.19]	Treg_002798
									ubiquitin-protein ligase E3 B [EC:6.3.2.19]	Treg_005794
						Environmental Information Processing
						KEGG pathways
						Membrane transport;ABC transporters (path:ko02010)	1	1	ATP-binding cassette, subfamily C (CFTR/MRP), member 4	Treg_009652
						Signal transduction;MAPK signaling pathway (path:ko04010)	2	3	cytosolic phospholipase A2 [EC:3.1.1.4]	Treg_008924
									cytosolic phospholipase A2 [EC:3.1.1.4]	Treg_008925
									mitogen-activated protein kinase kinase kinase 5 [EC:2.7.11.25]	Treg_016517
						Signal transduction;Ras signaling pathway (path:ko04014)	1	2	cytosolic phospholipase A2 [EC:3.1.1.4]	Treg_008924
									cytosolic phospholipase A2 [EC:3.1.1.4]	Treg_008925
						Signal transduction;NF-kappa B signaling pathway (path:ko04064)	1	1	ataxia telangiectasia mutated family protein [EC:2.7.11.1]	Treg_018014
						Signal transduction;HIF-1 signaling pathway (path:ko04066)	2	2	MFS transporter, SP family, solute carrier family 2 (facilitated glucose transporter), member 1	Treg_009879
									pyruvate dehydrogenase E1 component subunit alpha [EC:1.2.4.1]	Treg_000209
						Signal transduction;Phosphatidylinositol signaling system (path:ko04070)	3	4	1-phosphatidylinositol-4-phosphate 5-kinase [EC:2.7.1.68]	Treg_002501
									phosphatidylinositol 4-kinase [EC:2.7.1.67]	Treg_004134
									phosphatidylinositol-bisphosphatase [EC:3.1.3.36]	Treg_006067
									phosphatidylinositol-bisphosphatase [EC:3.1.3.36]	Treg_006069
						Signaling molecules and interaction;Neuroactive ligand-receptor interaction (path:ko04080)	2	2	dopamine D2-like receptor	Treg_012858
						Signal transduction;PI3K-Akt signaling pathway (path:ko04151)	1	2	collagen, type VI, alpha	Treg_008130
									collagen, type VI, alpha	Treg_018920
						Signal transduction;Notch signaling pathway (path:ko04330)	1	1	segment polarity protein dishevelled	Treg_004873
						Signal transduction;VEGF signaling pathway (path:ko04370)	1	2	cytosolic phospholipase A2 [EC:3.1.1.4]	Treg_008924
						Signal transduction;Wnt signaling pathway (path:ko04310)	1	1	segment polarity protein dishevelled	Treg_004873
									cytosolic phospholipase A2 [EC:3.1.1.4]	Treg_008925
						Signal transduction;Hippo signaling pathway (path:ko04390)	2	2	connective tissue growth factor	Treg_009114
						Signaling molecules and interaction;ECM-receptor interaction (path:ko04512)	1	2	collagen, type VI, alpha	Treg_008130
									collagen, type VI, alpha	Treg_018920
						Signal transduction;TNF signaling pathway (path:ko04668)	1	1	mitogen-activated protein kinase kinase kinase 5 [EC:2.7.11.25]	Treg_016517
						KEGG protein class
						Cell adhesion molecules and their ligands (br:ko04516)	2	3	collagen, type VI, alpha	Treg_008130
									collagen, type VI, alpha	Treg_018920
									connective tissue growth factor	Treg_009114
						Lectins (br:ko04091)	1	1	protein OS-9	Treg_018546
						Mitochondrial biogenesis (br:ko03029)	4	4	ATP-dependent DNA helicase PIF1 [EC:3.6.4.12]	Treg_012423
									cysteine protease ATG4 [EC:3.4.22.-]	Treg_005749
									host cell factor	Treg_005450
									small subunit ribosomal protein S16	Treg_018642
						Secretion system (Protein transport system (br:ko02044)	1	1	protein transport protein SEC61 subunit beta	Treg_007398
						Genetic Information Processing
						KEGG pathways
						Folding, sorting and degradation;Ubiquitin mediated proteolysis (path:ko04120)	3	3	anaphase-promoting complex subunit 5	Treg_005079
									ubiquitin-like 1-activating enzyme E1 B [EC:6.3.2.19]	Treg_002798
									ubiquitin-protein ligase E3 B [EC:6.3.2.19]	Treg_005794
						Folding, sorting and degradation;Sulfur relay system (path:ko04122)	1	1	cysteine desulfurase [EC:2.8.1.7]	Treg_009565
						Folding, sorting and degradation;Protein processing in endoplasmic reticulum (path:ko04141)	3	3	mitogen-activated protein kinase kinase kinase 5 [EC:2.7.11.25]	Treg_016517
									protein OS-9	Treg_018546
									protein transport protein SEC61 subunit beta	Treg_007398
						Folding, sorting and degradation;Proteasome (path:ko03050)	1	1	proteasome activator subunit 3 (PA28 gamma)	Treg_010984
						Folding, sorting and degradation;Protein export (path:ko03060)	1	1	protein transport protein SEC61 subunit beta	Treg_007398
						Replication and repair;Base excision repair (path:ko03410)	1	1	AP endonuclease 1 [EC:4.2.99.18]	Treg_009693
						Replication and repair;Homologous recombination (path:ko03440)	1	1	breast cancer 2 susceptibility protein	Treg_012333
						Replication and repair;Fanconi anemia pathway (path:ko03460)	2	2	breast cancer 2 susceptibility protein	Treg_012333
									WD repeat-containing protein 48	Treg_001669
									glucagon receptor	Treg_014212
						Translation;Ribosome (path:ko03010)	3	3	small subunit ribosomal protein S16	Treg_018642
									small subunit ribosomal protein S7	Treg_006104
									small subunit ribosomal protein S7e	Treg_014429
						Translation;mRNA surveillance pathway (path:ko03015)	2	2	cleavage and polyadenylation specificity factor subunit 1	Treg_004746
									PI-3-kinase-related kinase SMG-1	Treg_015075
						Transcription;Spliceosome (path:ko03040)	3	3	pre-mRNA-splicing factor ISY1	Treg_018352
									small nuclear ribonucleoprotein D3	Treg_016306
									U1 small nuclear ribonucleoprotein C	Treg_016765
						KEGG protein class
						Chaperones and folding catalysts (br:ko03110)	5	28	cathepsin A (carboxypeptidase C) [EC:3.4.16.5]	Treg_013943
									cathepsin B [EC:3.4.22.1]	Treg_015294
									cathepsin B [EC:3.4.22.1]	Treg_015853
									cathepsin B [EC:3.4.22.1]	Treg_018303
									cathepsin B [EC:3.4.22.1]	Treg_020247
									hexosaminidase [EC:3.2.1.52]	Treg_006008
									hexosaminidase [EC:3.2.1.52]	Treg_007118
									hexosaminidase [EC:3.2.1.52]	Treg_008394
									hexosaminidase [EC:3.2.1.52]	Treg_009625
									hexosaminidase [EC:3.2.1.52]	Treg_009837
									hexosaminidase [EC:3.2.1.52]	Treg_011272
									hexosaminidase [EC:3.2.1.52]	Treg_013277
									hexosaminidase [EC:3.2.1.52]	Treg_015078
									hexosaminidase [EC:3.2.1.52]	Treg_015334
									hexosaminidase [EC:3.2.1.52]	Treg_015335
									hexosaminidase [EC:3.2.1.52]	Treg_015336
									hexosaminidase [EC:3.2.1.52]	Treg_015398
									hexosaminidase [EC:3.2.1.52]	Treg_015400
									hexosaminidase [EC:3.2.1.52]	Treg_015937
									hexosaminidase [EC:3.2.1.52]	Treg_015938
									hexosaminidase [EC:3.2.1.52]	Treg_016910
									hexosaminidase [EC:3.2.1.52]	Treg_017067
									hexosaminidase [EC:3.2.1.52]	Treg_020191
									hexosaminidase [EC:3.2.1.52]	Treg_020246
									hexosaminidase [EC:3.2.1.52]	Treg_020390
									hexosaminidase [EC:3.2.1.52]	Treg_020391
									prefoldin subunit 4	Treg_006990
									suppressor of tumorigenicity protein 13	Treg_015649
						Chromosome (br:ko03036)	19	21	anaphase-promoting complex subunit 5	Treg_005079
									B9 domain-containing protein 2	Treg_011683
									breast cancer 2 susceptibility protein	Treg_012333
									C2 domain-containing protein 3	Treg_019514
									chromodomain-helicase-DNA-binding protein 5 [EC:3.6.4.12]	Treg_015407
									chromosome transmission fidelity protein 8	Treg_017298
									histone H4	Treg_012656
									histone-lysine N-methyltransferase EZH2 [EC:2.1.1.43]	Treg_017996
									histone-lysine N-methyltransferase SETD1 [EC:2.1.1.43]	Treg_006252
									histone-lysine N-methyltransferase SETD2 [EC:2.1.1.43]	Treg_007947
									host cell factor	Treg_005450
									leishmanolysin-like peptidase [EC:3.4.24.-]	Treg_005807
									NAD-dependent deacetylase sirtuin 2 [EC:3.5.1.-]	Treg_016447
									nephrocystin-4	Treg_011418
									serine/threonine-protein kinase TTK/MPS1 [EC:2.7.12.1]	Treg_005074
									tetratricopeptide repeat protein 8	Treg_019318
									tubulin alpha	Treg_011032
									tubulin alpha	Treg_017293
									tubulin alpha	Treg_018505
									tubulin epsilon	Treg_011228
									ubiquitin carboxyl-terminal hydrolase 22/27/51 [EC:3.1.2.15]	Treg_005910
						DNA repair and recombination proteins (br:ko03400)	6	6	AP endonuclease 1 [EC:4.2.99.18]	Treg_009693
									ataxia telangiectasia mutated family protein [EC:2.7.11.1]	Treg_018014
									ATP-dependent DNA helicase HFM1/MER3 [EC:3.6.4.12]	Treg_011206
									breast cancer 2 susceptibility protein	Treg_012333
									meiotic recombination protein SPO11	Treg_018610
									WD repeat-containing protein 48	Treg_001669
						DNA replication proteins (br:ko03032)	4	4	ataxia telangiectasia mutated family protein [EC:2.7.11.1]	Treg_018014
									ATP-dependent DNA helicase PIF1 [EC:3.6.4.12]	Treg_012423
									GINS complex subunit 3	Treg_017534
									small nuclear ribonucleoprotein D3	Treg_016306
						Exosome (br:ko04147)	9	14	annexin A7/11	Treg_010125
									cathepsin B [EC:3.4.22.1]	Treg_015294
									cathepsin B [EC:3.4.22.1]	Treg_015853
									cathepsin B [EC:3.4.22.1]	Treg_018303
									cathepsin B [EC:3.4.22.1]	Treg_020247
									ferritin heavy chain [EC:1.16.3.1]	Treg_011723
									kinesin family member 5	Treg_014487
									proteasome activator subunit 3 (PA28 gamma)	Treg_010984
									pyruvate kinase [EC:2.7.1.40]	Treg_006480
									septin 6/8/11	Treg_007483
									septin 7	Treg_001794
									tubulin alpha	Treg_011032
									tubulin alpha	Treg_017293
									tubulin alpha	Treg_018505
						Proteasome (br:ko03051)	1	1	proteasome activator subunit 3 (PA28 gamma)	Treg_010984
						Transcription factors (br:ko03000)	7	7	hairy and enhancer of split related with YRPW motif	Treg_013648
									heart-and neural crest derivatives-expressed protein	Treg_012049
									IKAROS family zinc finger protein	Treg_013095
									neurogenic differentiation factor 1	Treg_011326
									odd-skipped	Treg_019400
									transcriptional repressor NF-X1 [EC:6.3.2.-]	Treg_005685
									Y-box-binding protein 1	Treg_012397
						Transfer RNA biogenesis (br:ko03016)	2	2	cysteine desulfurase [EC:2.8.1.7]	Treg_009565
									tRNASer (uridine44-2'-O)-methyltransferase [EC:2.1.1.211]	Treg_020394
						Transcription machinery (RNA polymerase) (br:ko03021)	2	2	cleavage and polyadenylation specificity factor subunit 1	Treg_004746
									ubiquitin carboxyl-terminal hydrolase 22/27/51 [EC:3.1.2.15]	Treg_005910
						Cellular Processes
						KEGG pathways
						Cell growth and death;Apoptosis (path:ko04210)	1	1	ataxia telangiectasia mutated family protein [EC:2.7.11.1]	Treg_018014
									segment polarity protein dishevelled	Treg_004873
						Cell communication;Focal adhesion (path:ko04510)	1	2	collagen, type VI, alpha	Treg_008130
									collagen, type VI, alpha	Treg_018920
						Cell communication;Tight junction (path:ko04530)	1	1	exocyst complex component 4	Treg_004278
						Cell communication;Gap junction (path:ko04540)	1	3	tubulin alpha	Treg_011032
									tubulin alpha	Treg_017293
									tubulin alpha	Treg_018505
						Cell motility;Regulation of actin cytoskeleton (path:ko04810)	1	1	1-phosphatidylinositol-4-phosphate 5-kinase [EC:2.7.1.68]	Treg_002501
						Cell growth and death;Cell cycle (path:ko04110)	3	3	anaphase-promoting complex subunit 5	Treg_005079
									ataxia telangiectasia mutated family protein [EC:2.7.11.1]	Treg_018014
									serine/threonine-protein kinase TTK/MPS1 [EC:2.7.12.1]	Treg_005074
						Cell growth and death;Cell cycle - yeast (path:ko04111)	2	2	anaphase-promoting complex subunit 5	Treg_005079
									serine/threonine-protein kinase TTK/MPS1 [EC:2.7.12.1]	Treg_005074
						Cell growth and death;Meiosis - yeast (path:ko04113)	2	2	anaphase-promoting complex subunit 5	Treg_005079
									meiotic recombination protein SPO11	Treg_018610
						Cell growth and death;Oocyte meiosis (path:ko04114)	1	1	anaphase-promoting complex subunit 5	Treg_005079
						Cell growth and death;p53 signaling pathway (path:ko04115)	1	1	ataxia telangiectasia mutated family protein [EC:2.7.11.1]	Treg_018014
						Cytoskeleton proteins (br:ko04812)	11	15	dynein heavy chain, axonemal	Treg_011876
									dynein light chain 4, axonemal	Treg_012099
									dynein light chain LC8-type	Treg_011138
									dynein light chain LC8-type	Treg_014939
									kinesin family member 1	Treg_012301
									kinesin family member 5	Treg_014487
									myosin VII	Treg_018192
									septin 6/8/11	Treg_007483
									septin 7	Treg_001794
									tubulin alpha	Treg_011032
									tubulin alpha	Treg_017293
									tubulin alpha	Treg_018505
									tubulin epsilon	Treg_011228
									tubulin polyglutamylase TTLL5 [EC:6.-.-.-]	Treg_012495
									tubulin polyglutamylase TTLL5 [EC:6.-.-.-]	Treg_019513
						Transport and catabolism;Regulation of autophagy (path:ko04140)	1	1	cysteine protease ATG4 [EC:3.4.22.-]	Treg_005749
						Transport and catabolism;Lysosome (path:ko04142)	7	38	beta-galactosidase [EC:3.2.1.23]	Treg_015412
									cathepsin A (carboxypeptidase C) [EC:3.4.16.5]	Treg_013943
									cathepsin B [EC:3.4.22.1]	Treg_015294
									cathepsin B [EC:3.4.22.1]	Treg_015853
									cathepsin B [EC:3.4.22.1]	Treg_018303
									cathepsin B [EC:3.4.22.1]	Treg_020247
									cathepsin D [EC:3.4.23.5]	Treg_007039
									cathepsin D [EC:3.4.23.5]	Treg_007041
									cathepsin D [EC:3.4.23.5]	Treg_007274
									cathepsin D [EC:3.4.23.5]	Treg_009554
									cathepsin D [EC:3.4.23.5]	Treg_015703
									cathepsin D [EC:3.4.23.5]	Treg_017006
									cathepsin D [EC:3.4.23.5]	Treg_018267
									hexosaminidase [EC:3.2.1.52]	Treg_006008
									hexosaminidase [EC:3.2.1.52]	Treg_007118
									hexosaminidase [EC:3.2.1.52]	Treg_008394
									hexosaminidase [EC:3.2.1.52]	Treg_009625
									hexosaminidase [EC:3.2.1.52]	Treg_009837
									hexosaminidase [EC:3.2.1.52]	Treg_011272
									hexosaminidase [EC:3.2.1.52]	Treg_013277
									hexosaminidase [EC:3.2.1.52]	Treg_015078
									hexosaminidase [EC:3.2.1.52]	Treg_015334
									hexosaminidase [EC:3.2.1.52]	Treg_015335
									hexosaminidase [EC:3.2.1.52]	Treg_015336
									hexosaminidase [EC:3.2.1.52]	Treg_015398
									hexosaminidase [EC:3.2.1.52]	Treg_015400
									hexosaminidase [EC:3.2.1.52]	Treg_015937
									hexosaminidase [EC:3.2.1.52]	Treg_015938
									hexosaminidase [EC:3.2.1.52]	Treg_016910
									hexosaminidase [EC:3.2.1.52]	Treg_017067
									hexosaminidase [EC:3.2.1.52]	Treg_020191
									hexosaminidase [EC:3.2.1.52]	Treg_020246
									hexosaminidase [EC:3.2.1.52]	Treg_020390
									hexosaminidase [EC:3.2.1.52]	Treg_020391
									legumain [EC:3.4.22.34]	Treg_006584
									legumain [EC:3.4.22.34]	Treg_008970
									lysophospholipase III [EC:3.1.1.5]	Treg_011040
									lysophospholipase III [EC:3.1.1.5]	Treg_017620
						Transport and catabolism;Endocytosis (path:ko04144)	1	1	1-phosphatidylinositol-4-phosphate 5-kinase [EC:2.7.1.68]	Treg_002501
						Transport and catabolism;Phagosome (path:ko04145)	2	4	protein transport protein SEC61 subunit beta	Treg_007398
									tubulin alpha	Treg_011032
									tubulin alpha	Treg_017293
									tubulin alpha	Treg_018505
						Transport and catabolism;Peroxisome (path:ko04146)	1	1	superoxide dismutase, Cu-Zn family [EC:1.15.1.1]	Treg_006015
						KEGG protein class
						Ribosome (br:ko03011)	3	3	small subunit ribosomal protein S16	Treg_018642
									small subunit ribosomal protein S7	Treg_006104
									small subunit ribosomal protein S7e	Treg_014429
						Spliceosome (br:ko03041)	11	11	CDC-like kinase [EC:2.7.12.1]	Treg_003727
									DNA/RNA-binding protein KIN17	Treg_005761
									pre-mRNA-splicing factor CWC22	Treg_005957
									pre-mRNA-splicing factor ISY1	Treg_018352
									protein FAM50	Treg_009932
									RNA-binding protein 5/10	Treg_000142
									small nuclear ribonucleoprotein D3	Treg_016306
									splicing factor, arginine/serine-rich 12	Treg_020326
									U11/U12 small nuclear ribonucleoprotein 65 kDa protein	Treg_005574
									U1 small nuclear ribonucleoprotein C	Treg_016765
									Y-box-binding protein 1	Treg_012397
									ATP-dependent DNA helicase HFM1/MER3 [EC:3.6.4.12]	Treg_011206
									breast cancer 2 susceptibility protein	Treg_012333
									meiotic recombination protein SPO11	Treg_018610
									WD repeat-containing protein 48	Treg_001669
						DNA replication proteins (br:ko03032)	4	4	ataxia telangiectasia mutated family protein [EC:2.7.11.1]	Treg_018014
									ATP-dependent DNA helicase PIF1 [EC:3.6.4.12]	Treg_012423
									GINS complex subunit 3	Treg_017534
									small nuclear ribonucleoprotein D3	Treg_016306
						Exosome (br:ko04147)	9	14	annexin A7/11	Treg_010125
									cathepsin B [EC:3.4.22.1]	Treg_015294
									cathepsin B [EC:3.4.22.1]	Treg_015853
									cathepsin B [EC:3.4.22.1]	Treg_018303
									cathepsin B [EC:3.4.22.1]	Treg_020247
									ferritin heavy chain [EC:1.16.3.1]	Treg_011723
									kinesin family member 5	Treg_014487
									proteasome activator subunit 3 (PA28 gamma)	Treg_010984
									pyruvate kinase [EC:2.7.1.40]	Treg_006480
									septin 6/8/11	Treg_007483
									septin 7	Treg_001794
									tubulin alpha	Treg_011032
									tubulin alpha	Treg_017293
									tubulin alpha	Treg_018505
						Proteasome (br:ko03051)	1	1	proteasome activator subunit 3 (PA28 gamma)	Treg_010984
						Transcription factors (br:ko03000)	7	7	hairy and enhancer of split related with YRPW motif	Treg_013648
									heart-and neural crest derivatives-expressed protein	Treg_012049
									IKAROS family zinc finger protein	Treg_013095
									neurogenic differentiation factor 1	Treg_011326
									odd-skipped	Treg_019400
									transcriptional repressor NF-X1 [EC:6.3.2.-]	Treg_005685
									Y-box-binding protein 1	Treg_012397
						Transfer RNA biogenesis (br:ko03016)	2	2	cysteine desulfurase [EC:2.8.1.7]	Treg_009565
									tRNASer (uridine44-2'-O)-methyltransferase [EC:2.1.1.211]	Treg_020394
						Transcription machinery (RNA polymerase) (br:ko03021)	2	2	cleavage and polyadenylation specificity factor subunit 1	Treg_004746
									ubiquitin carboxyl-terminal hydrolase 22/27/51 [EC:3.1.2.15]	Treg_005910
						Cellular Processes
						KEGG pathways
						Cell growth and death;Apoptosis (path:ko04210)	1	1	ataxia telangiectasia mutated family protein [EC:2.7.11.1]	Treg_018014
									segment polarity protein dishevelled	Treg_004873
						Cell communication;Focal adhesion (path:ko04510)	1	2	collagen, type VI, alpha	Treg_008130
									collagen, type VI, alpha	Treg_018920
						Cell communication;Tight junction (path:ko04530)	1	1	exocyst complex component 4	Treg_004278
						Cell communication;Gap junction (path:ko04540)	1	3	tubulin alpha	Treg_011032
									tubulin alpha	Treg_017293
									tubulin alpha	Treg_018505
						Cell motility;Regulation of actin cytoskeleton (path:ko04810)	1	1	1-phosphatidylinositol-4-phosphate 5-kinase [EC:2.7.1.68]	Treg_002501
						Cell growth and death;Cell cycle (path:ko04110)	3	3	anaphase-promoting complex subunit 5	Treg_005079
									ataxia telangiectasia mutated family protein [EC:2.7.11.1]	Treg_018014
									serine/threonine-protein kinase TTK/MPS1 [EC:2.7.12.1]	Treg_005074
						Cell growth and death;Cell cycle - yeast (path:ko04111)	2	2	anaphase-promoting complex subunit 5	Treg_005079
									serine/threonine-protein kinase TTK/MPS1 [EC:2.7.12.1]	Treg_005074
						Cell growth and death;Meiosis - yeast (path:ko04113)	2	2	anaphase-promoting complex subunit 5	Treg_005079
									meiotic recombination protein SPO11	Treg_018610
						Cell growth and death;Oocyte meiosis (path:ko04114)	1	1	anaphase-promoting complex subunit 5	Treg_005079
						Cell growth and death;p53 signaling pathway (path:ko04115)	1	1	ataxia telangiectasia mutated family protein [EC:2.7.11.1]	Treg_018014
						Cytoskeleton proteins (br:ko04812)	11	15	dynein heavy chain, axonemal	Treg_011876
									dynein light chain 4, axonemal	Treg_012099
									dynein light chain LC8-type	Treg_011138
									dynein light chain LC8-type	Treg_014939
									kinesin family member 1	Treg_012301
									kinesin family member 5	Treg_014487
									myosin VII	Treg_018192
									septin 6/8/11	Treg_007483
									septin 7	Treg_001794
									tubulin alpha	Treg_011032
									tubulin alpha	Treg_017293
									tubulin alpha	Treg_018505
									tubulin epsilon	Treg_011228
									tubulin polyglutamylase TTLL5 [EC:6.-.-.-]	Treg_012495
									tubulin polyglutamylase TTLL5 [EC:6.-.-.-]	Treg_019513
						Transport and catabolism;Regulation of autophagy (path:ko04140)	1	1	cysteine protease ATG4 [EC:3.4.22.-]	Treg_005749
						Transport and catabolism;Lysosome (path:ko04142)	7	38	beta-galactosidase [EC:3.2.1.23]	Treg_015412
									cathepsin A (carboxypeptidase C) [EC:3.4.16.5]	Treg_013943
									cathepsin B [EC:3.4.22.1]	Treg_015294
									cathepsin B [EC:3.4.22.1]	Treg_015853
									cathepsin B [EC:3.4.22.1]	Treg_018303
									cathepsin B [EC:3.4.22.1]	Treg_020247
									cathepsin D [EC:3.4.23.5]	Treg_007039
									cathepsin D [EC:3.4.23.5]	Treg_007041
									cathepsin D [EC:3.4.23.5]	Treg_007274
									cathepsin D [EC:3.4.23.5]	Treg_009554
									cathepsin D [EC:3.4.23.5]	Treg_015703
									cathepsin D [EC:3.4.23.5]	Treg_017006
									cathepsin D [EC:3.4.23.5]	Treg_018267
									hexosaminidase [EC:3.2.1.52]	Treg_006008
									hexosaminidase [EC:3.2.1.52]	Treg_007118
									hexosaminidase [EC:3.2.1.52]	Treg_008394
									hexosaminidase [EC:3.2.1.52]	Treg_009625
									hexosaminidase [EC:3.2.1.52]	Treg_009837
									hexosaminidase [EC:3.2.1.52]	Treg_011272
									hexosaminidase [EC:3.2.1.52]	Treg_013277
									hexosaminidase [EC:3.2.1.52]	Treg_015078
									hexosaminidase [EC:3.2.1.52]	Treg_015334
									hexosaminidase [EC:3.2.1.52]	Treg_015335
									hexosaminidase [EC:3.2.1.52]	Treg_015336
									hexosaminidase [EC:3.2.1.52]	Treg_015398
									hexosaminidase [EC:3.2.1.52]	Treg_015400
									hexosaminidase [EC:3.2.1.52]	Treg_015937
									hexosaminidase [EC:3.2.1.52]	Treg_015938
									hexosaminidase [EC:3.2.1.52]	Treg_016910
									hexosaminidase [EC:3.2.1.52]	Treg_017067
									hexosaminidase [EC:3.2.1.52]	Treg_020191
									hexosaminidase [EC:3.2.1.52]	Treg_020246
									hexosaminidase [EC:3.2.1.52]	Treg_020390
									hexosaminidase [EC:3.2.1.52]	Treg_020391
									legumain [EC:3.4.22.34]	Treg_006584
									legumain [EC:3.4.22.34]	Treg_008970
									lysophospholipase III [EC:3.1.1.5]	Treg_011040
									lysophospholipase III [EC:3.1.1.5]	Treg_017620
						Transport and catabolism;Endocytosis (path:ko04144)	1	1	1-phosphatidylinositol-4-phosphate 5-kinase [EC:2.7.1.68]	Treg_002501
						Transport and catabolism;Phagosome (path:ko04145)	2	4	protein transport protein SEC61 subunit beta	Treg_007398
									tubulin alpha	Treg_011032
									tubulin alpha	Treg_017293
									tubulin alpha	Treg_018505
						Transport and catabolism;Peroxisome (path:ko04146)	1	1	superoxide dismutase, Cu-Zn family [EC:1.15.1.1]	Treg_006015
						KEGG protein class
						Ribosome (br:ko03011)	3	3	small subunit ribosomal protein S16	Treg_018642
									small subunit ribosomal protein S7	Treg_006104
									small subunit ribosomal protein S7e	Treg_014429
						Spliceosome (br:ko03041)	11	11	CDC-like kinase [EC:2.7.12.1]	Treg_003727
									DNA/RNA-binding protein KIN17	Treg_005761
									pre-mRNA-splicing factor CWC22	Treg_005957
									pre-mRNA-splicing factor ISY1	Treg_018352
									protein FAM50	Treg_009932
									RNA-binding protein 5/10	Treg_000142
									small nuclear ribonucleoprotein D3	Treg_016306
									splicing factor, arginine/serine-rich 12	Treg_020326
									U11/U12 small nuclear ribonucleoprotein 65 kDa protein	Treg_005574
									U1 small nuclear ribonucleoprotein C	Treg_016765
									Y-box-binding protein 1	Treg_012397
