# Supplementary material for: Comparative Transcriptomic Exploration Reveals Unique Molecular Adaptations of Neuropathogenic Trichobilharzia to Invade and Parasitize Its Avian Definitive Host
Source: PLoS Negl Trop Dis. 2016 Feb 10;10(2):e0004406. doi: 10.1371/journal.pntd.0004406 (PMC4749378; doi:10.1371/journal.pntd.0004406)
Supplement: S8 Table — Sorted in descending based on log2-fold change of differential transcription. (XLSX) [file pntd.0004406.s008.xlsx]

## Sheet: S8
	S8 Table. Summary of transcripts upregulated in the cercaria stage of Trichobilharzia regenti based on read mapping to the (consensus) transcriptome with National Center for Biotechnology Information (NCBI) annotation. Sorted in descending based on log2-fold change of differential transcription.
		Expected counts based on RSEM
		Cercariae replicates				Schistosomula replicates
	Transcript ID	C1	C2	C3	C4	S1	S2	S3	S4	Log2 fold change	False discovery rate	NCBI annotation
	Treg_000002	29900	33440	18496	29570	0	0	0	0	-18.43	1.36e-276	NO HIT
	Treg_000452	12115	10016	8742	10474	0	0	0	0	-18.33	1.25e-248	gi|159792922|gb|ABW98681.1| venom allergen-like protein 8 [Schistosoma mansoni]
	Treg_000248	7985	8018	3918	8456	0	0	0	0	-17.51	3.36e-129	gi|256052720|ref|XP_002569901.1| tegumental protein [Schistosoma mansoni]gi|225200249|gb|ACN82431.1| tegumental allergen-like protein [Schistosoma mansoni]gi|353230233|emb|CCD76404.1| putative tegumental protein [Schistosoma mansoni]
	Treg_003587	50599.7	38787.6	19052	25890.5	0	3	0	0	-17.11	4.55e-234	NO HIT
	Treg_003763	7104.2	5420.7	4269.7	7032.7	0	0	0	0	-16.51	5.01e-211	gi|256075345|ref|XP_002573980.1| Calcium-binding protein 2 (CaBP2) [Schistosoma mansoni]gi|360044816|emb|CCD82364.1| putative calcium-binding protein 2 (CaBP2) [Schistosoma mansoni]
	Treg_000203	4125	4554	2383	3863	0	0	0	0	-15.9	1.15e-168	NO HIT
	Treg_000153	12242	12449	5414	11564	0	1.3	0	0	-15.45	7.99e-127	gi|454247|emb|CAA82847.1| zinc finger protein (putative) [Schistosoma mansoni]
	Treg_000941	2684	2186	1975	2858	0	0	0	0	-15.34	2.74e-191	NO HIT
	Treg_000009	3630.8	2596.3	818.8	2013.7	0	2	1.2	0	-15.32	2.21e-96	gi|256084831|ref|XP_002578629.1| hypothetical protein [Schistosoma mansoni]gi|360045153|emb|CCD82701.1| conserved Schistosoma protein, unknown function [Schistosoma mansoni]
	Treg_000069	7240.3	4941.6	2578.7	5688.7	1	3	2	1	-15.27	4.64e-126	NO HIT
	Treg_000112	24849	16624	13409	24832	3	5	3	2	-15.13	3.74e-239	gi|256074546|ref|XP_002573585.1| glutamine synthetase bacteria [Schistosoma mansoni]gi|360044414|emb|CCD81962.1| putative glutamine synthetase bacteria [Schistosoma mansoni]
	Treg_003585	23615.8	24768.1	10194.3	22322.3	0.5	1	0.8	1.7	-15.1	2.25e-249	gi|256084831|ref|XP_002578629.1| hypothetical protein [Schistosoma mansoni]gi|360045153|emb|CCD82701.1| conserved Schistosoma protein, unknown function [Schistosoma mansoni]
	Treg_000514	1202	1347	567	1126	0	0	0	0	-14.59	1.9e-105	gi|256076875|ref|XP_002574734.1| Calmodulin (CaM) [Schistosoma mansoni]gi|360044076|emb|CCD81623.1| putative calmodulin (CaM) [Schistosoma mansoni]
	Treg_000442	1216	1237	802	1211	0	0	0	0	-14.41	1.53e-131	NO HIT
	Treg_000878	951.9	934.9	554	1032	0	0	0	0	-14.27	5.2e-130	NO HIT
	Treg_003936	719	776	504	667	0	0	0	0	-14.12	5.53e-125	NO HIT
	Treg_000031	13901	13318	6232	10168	2	0	0	0	-14.04	2.18e-113	gi|226485052|emb|CAX79803.1| Calcium-binding EF-hand,domain-containing protein [Schistosoma japonicum]
	Treg_000619	775	973	321	856	0	0	0	0	-13.96	2.53e-68	NO HIT
	Treg_000633	929	568	434	669	0	0	0	0	-13.89	2.06e-137	gi|256076881|ref|XP_002574737.1| calmodulin [Schistosoma mansoni]gi|360044079|emb|CCD81626.1| putative calmodulin [Schistosoma mansoni]
	Treg_000137	2973.8	3898.1	1881.7	3041.4	2	0	1	2	-13.87	5.51e-119	NO HIT
	Treg_000778	3229.3	3103.7	1979.3	3448.7	1.8	1.9	0	0	-13.8	1.08e-136	gi|256070967|ref|XP_002571813.1| venom allergen-like (VAL) 6 protein [Schistosoma mansoni]gi|353228625|emb|CCD74796.1| venom allergen-like (VAL) 6 protein [Schistosoma mansoni]
	Treg_000370	3168.6	1103.9	874.8	1569.6	0	0	2	0	-13.71	1.28e-123	NO HIT
	Treg_000275	5606	5264	3877	4631	1	2	1	3	-13.53	5.14e-167	NO HIT
	Treg_000058	517.6	141.1	556.2	665.8	0	0	0	0	-13.37	1.83e-83	NO HIT
	Treg_003619	2553	2012	928	1339	0	1	1	0	-13.25	8.25e-93	NO HIT
	Treg_000255	860.9	1263	674.9	1038	1	0	0	0	-13.09	4.11e-101	NO HIT
	Treg_005689	349.9	164.6	303.9	464.1	0	0	0	0	-12.86	1.23e-134	NO HIT
	Treg_004285	403	157	329	427	0	0	0	0	-12.59	1.03e-105	gi|353232801|emb|CCD80157.1| hypothetical protein Smp_159200 [Schistosoma mansoni]
	Treg_002119	273	235	3047	528	0	0	2	0	-12.56	3.54e-21	gi|339283814|gb|AEJ38175.1| RNA-dependent RNA polymerase [Gouleako virus]
	Treg_000950	2057	2356	1321	2962	2	1	2	2	-12.52	2.08e-127	gi|353229013|emb|CCD75184.1| putative sodium-dependent neurotransmitter transporter [Schistosoma mansoni]
	Treg_003721	268	278	160	226	0	0	0	0	-12.22	1.39e-82	NO HIT
	Treg_001362	712	993	438	1040	1	4	1	1	-12.1	7.77e-88	gi|256090094|ref|XP_002581053.1| purine nucleoside phosphorylase [Schistosoma mansoni]
	Treg_000026	67615.3	97296.2	38030.1	79627.2	1.8	9	3.7	3.6	-12.04	6.31e-186	NO HIT
	Treg_000257	323	150	232	243	0	0	0	0	-12.02	1.71e-103	NO HIT
	Treg_005330	710.2	472.8	636	728.2	1	0	0	1	-12.01	3.5e-167	NO HIT
	Treg_002924	131	130	128	147	0	0	0	0	-11.96	4.32e-105	gi|358338146|dbj|GAA56456.1| hypothetical protein CLF_110927 [Clonorchis sinensis]
	Treg_002392	169	46	216	173	0	0	0	0	-11.81	4.64e-56	NO HIT
	Treg_003698	243	96	208	170	0	0	0	0	-11.79	7.81e-82	NO HIT
	Treg_004032	246	153	162	187	0	0	0	0	-11.78	5.45e-97	NO HIT
	Treg_000741	177	56	198	134	0	0	0	0	-11.73	4.41e-62	NO HIT
	Treg_000737	331	292	135	295	0	0	0	0	-11.65	3.28e-80	NO HIT
	Treg_002473	262	270	200	289	0	0	0	0	-11.62	5.09e-101	gi|256093071|ref|XP_002582199.1| venom allergen-like (VAL) 28 protein [Schistosoma mansoni]gi|353233281|emb|CCD80636.1| venom allergen-like (VAL) 28 protein [Schistosoma mansoni]gi|353233283|emb|CCD80638.1| venom allergen-like (VAL) 26 protein [Schistosoma mansoni]
	Treg_003343	124	109	2079	301	0	1	0	1	-11.46	6.49e-19	gi|395805312|gb|AFN73042.1| polymerase, partial [Manawa virus]
	Treg_001384	177	148	137	182	0	0	0	0	-11.42	1.31e-89	gi|56755984|gb|AAW26170.1| SJCHGC07515 protein [Schistosoma japonicum]
	Treg_003770	212.4	49.1	197.2	168.4	0	0	0	1	-11.4	1.91e-48	NO HIT
	Treg_000021	57248.5	22360.6	29529.4	47703.8	84	64.5	125.2	189.2	-11.38	2.3e-77	gi|353230362|emb|CCD76533.1| putative atp:guanidino kinase (Smc74) [Schistosoma mansoni]
	Treg_000655	235	198	90	174	0	0	0	0	-11.36	6.05e-57	NO HIT
	Treg_000798	240	216	141	290	0	0	0	1	-11.15	3.03e-108	gi|74768210|sp|Q5BQU6.1|SJ803_SCHJA RecName: Full=Uncharacterized protein SJCHGC09803; Flags: Precursorgi|60700985|gb|AAX31090.1| SJCHGC09803 protein [Schistosoma japonicum]
	Treg_000431	3013	2982	1329	2612	7	5	10	9	-11.12	8.17e-121	gi|2623832|gb|AAB86564.1| unknown [Schistosoma mansoni]
	Treg_004029	160.9	74.7	148.1	128.2	0	0	0	0	-11.05	7.93e-63	gi|353232546|emb|CCD79901.1| putative alpha-amylase [Schistosoma mansoni]
	Treg_002218	71	40	66	90	0	0	0	0	-11.05	4.15e-74	gi|256089415|ref|XP_002580805.1| beta-arrestin 1 [Schistosoma mansoni]gi|360043506|emb|CCD78919.1| putative beta-arrestin 1 [Schistosoma mansoni]
	Treg_001117	6423	2277	12756	6255	35	43	50	62	-11.04	5.48e-42	gi|360043658|emb|CCD81204.1| putative fibrocystin l [Schistosoma mansoni]
	Treg_001027	955	894	605	1179	3	5	5	1	-10.91	2.52e-130	gi|226468082|emb|CAX76268.1| putative Retinol dehydrogenase 11 [Schistosoma japonicum]
	Treg_001668	94	158	100	161	0	0	0	0	-10.86	1.47e-63	NO HIT
	Treg_002290	100	102	67	149	0	0	0	0	-10.8	2.31e-54	NO HIT
	Treg_003974	128.5	18.9	131.5	147.5	0	0	0	0	-10.75	1.23e-27	gi|256079438|ref|XP_002575994.1| hypothetical protein [Schistosoma mansoni]gi|353231246|emb|CCD77664.1| putative wd40 protein [Schistosoma mansoni]
	Treg_000232	1694	753	793	1979	4	2	4	2	-10.73	5.4e-148	gi|256084833|ref|XP_002578630.1| hypothetical protein [Schistosoma mansoni]gi|360045154|emb|CCD82702.1| conserved Schistosoma protein, unknown function [Schistosoma mansoni]
	Treg_001831	105.4	131.5	78.3	121.9	1	0	0	0	-10.69	3.12e-51	gi|513192686|ref|XP_004942466.1| PREDICTED: tissue factor pathway inhibitor isoform X12 [Gallus gallus]
	Treg_000215	2060.3	2002.4	1721.5	2616.3	3	0	1	0	-10.59	1.24e-161	gi|256088823|ref|XP_002580523.1| calcium-binding protein [Schistosoma mansoni]gi|1711398|sp|Q07167.1|SM16_SCHMA RecName: Full=16 kDa calcium-binding protein; AltName: Full=Egg antigen SME16gi|294856|gb|AAA29859.1| calcium-binding protein, partial [Schistosoma mansoni]
	Treg_004721	71	112	54	120	0	0	0	0	-10.5	3.51e-50	NO HIT
	Treg_000985	132	24.9	80.3	64	0	0	0	0	-10.48	1.87e-33	NO HIT
	Treg_000502	2097.6	2034.6	1112.5	2243.4	4.9	6.6	9.7	9.8	-10.48	1e-106	gi|256084835|ref|XP_002578631.1| hypothetical protein [Schistosoma mansoni]gi|238664011|emb|CAZ34869.1| conserved Schistosoma protein, unknown function [Schistosoma mansoni]
	Treg_005500	31.1	22.7	35.9	56.8	0	0	0	0	-10.4	6.66e-50	NO HIT
	Treg_003834	358	435	355	502	2	5	0	1	-10.37	3.04e-118	NO HIT
	Treg_002247	34	24	31	33	0	0	0	0	-10.22	3.39e-51	gi|256089463|ref|XP_002580829.1| hypothetical protein [Schistosoma mansoni]gi|360043535|emb|CCD78948.1| hypothetical protein Smp_177100 [Schistosoma mansoni]
	Treg_005864	27	4.3	58.4	22.3	0	0	0	0	-10.04	5.17e-23	NO HIT
	Treg_000183	24779.7	23708.1	14557.4	28079.5	122.9	100.4	108.7	91.3	-10.04	3.18e-81	gi|226487582|emb|CAX74661.1| Dehydrogenase/reductase SDR family member 1 [Schistosoma japonicum]
	Treg_002039	105.6	70.1	41.5	131.9	0	0	0	0	-9.99	3.32e-33	gi|226489609|emb|CAX74955.1| Endothelin-converting enzyme 1 [Schistosoma japonicum]
	Treg_001001	672	769	513	733	4	0	6	4	-9.97	8.86e-112	gi|358333478|dbj|GAA51988.1| cornifelin [Clonorchis sinensis]
	Treg_000486	275	352	236	344	1	1	1	1	-9.91	1.07e-98	NO HIT
	Treg_002597	50	63	77	49	0	0	0	0	-9.88	2.78e-31	gi|256062297|ref|XP_002570303.1| hypothetical protein [Schistosoma mansoni]gi|227294234|emb|CAY19136.1| hypothetical protein Smp_121070 [Schistosoma mansoni]
	Treg_002028	78	60	48	74	0	0	0	0	-9.86	6.87e-40	NO HIT
	Treg_000019	19947.6	44689.8	10545	17783.1	88.5	134.8	88.8	43.6	-9.85	8.24e-37	gi|353230362|emb|CCD76533.1| putative atp:guanidino kinase (Smc74) [Schistosoma mansoni]
	Treg_003645	22987.7	23315.4	12963.3	23201.1	379	341	267.2	281.4	-9.82	5.81e-81	NO HIT
	Treg_002675	40	14	74	47	0	0	0	0	-9.81	2.15e-30	NO HIT
	Treg_001979	171	27	122	108	1	0	0	0	-9.78	3.32e-39	NO HIT
	Treg_000429	581	200	492	380	0	0	1	0	-9.77	5.61e-123	NO HIT
	Treg_001061	48	27	36	23	0	0	0	0	-9.72	1.87e-32	gi|256089463|ref|XP_002580829.1| hypothetical protein [Schistosoma mansoni]gi|360043535|emb|CCD78948.1| hypothetical protein Smp_177100 [Schistosoma mansoni]
	Treg_002735	50	34	34	30	0	0	0	0	-9.7	2.28e-37	NO HIT
	Treg_002284	220	260	136	271	0	0	4	2	-9.67	2.68e-79	gi|56754704|gb|AAW25537.1| SJCHGC06318 protein [Schistosoma japonicum]gi|226478012|emb|CAX72699.1| Actin 5C [Schistosoma japonicum]gi|226478032|emb|CAX72709.1| Actin 5C [Schistosoma japonicum]gi|226478046|emb|CAX72716.1| Actin 5C [Schistosoma japonicum]gi|226478054|emb|CAX72720.1| Actin 5C [Schistosoma japonicum]gi|226478074|emb|CAX72730.1| Actin 5C [Schistosoma japonicum]gi|226478084|emb|CAX7273…
	Treg_001746	655	446	447	634	3	2	1	3	-9.63	2.41e-160	gi|256066178|ref|XP_002570489.1| hypothetical protein [Schistosoma mansoni]gi|227299168|emb|CAY18011.1| hypothetical protein Smp_179200 [Schistosoma mansoni]
	Treg_003597	531.8	459.2	264.5	592	4	2	1	0	-9.62	3.54e-114	NO HIT
	Treg_003234	11	49	41	32	0	0	0	0	-9.5	7.01e-19	NO HIT
	Treg_000249	1650	1443	1382	1839	7	20	8	11	-9.5	1.18e-133	gi|353230029|emb|CCD76200.1| putative heat shock protein hsp16 [Schistosoma mansoni]
	Treg_000007	8385.7	11252.7	7741.5	11777.1	61.8	86.5	69.4	49.4	-9.42	1.92e-165	NO HIT
	Treg_005829	27.5	24.2	26.2	27.3	0	0	0	0	-9.4	3.26e-35	NO HIT
	Treg_003891	182	144	101	128	0	1	0	1	-9.39	1.36e-63	NO HIT
	Treg_002777	30	28	15	34	0	0	0	0	-9.38	2.53e-32	gi|256070373|ref|XP_002571517.1| hypothetical protein [Schistosoma mansoni]gi|350645343|emb|CCD59966.1| hypothetical protein Smp_000500.1 [Schistosoma mansoni]
	Treg_001043	848	1017.5	752.7	1187.5	8	4	5	8	-9.26	1.91e-117	NO HIT
	Treg_002029	13	4	83	5	0	0	0	0	-9.21	8.25e-15	gi|256089818|ref|XP_002580952.1| hypothetical protein [Schistosoma mansoni]
	Treg_000511	1004	1342	621	1212	9	2	6	2	-9.2	5.2e-102	gi|256077084|ref|XP_002574838.1| phosphatidylcholine transfer protein [Schistosoma mansoni]
	Treg_004323	56	14.5	67	33	0	0	0	0	-9.19	1.08e-18	NO HIT
	Treg_000136	48.3	22.5	36.2	38.9	0	0	0	0	-9.17	2.99e-29	NO HIT
	Treg_001859	44	39	20	35	0	0	0	1	-9.11	9.76e-25	NO HIT
	Treg_003062	39	4	20	20	0	0	0	0	-9.09	3.25e-22	NO HIT
	Treg_003584	232.3	261	122.9	281.1	1.5	0	0	2.3	-8.98	5.67e-78	gi|256084831|ref|XP_002578629.1| hypothetical protein [Schistosoma mansoni]gi|360045153|emb|CCD82701.1| conserved Schistosoma protein, unknown function [Schistosoma mansoni]
	Treg_002772	4	14	12	7	0	0	0	0	-8.85	7.13e-18	NO HIT
	Treg_000683	3101	2706	1800	3376	25	38	33	31	-8.8	6.82e-143	gi|256079188|ref|XP_002575871.1| annexin [Schistosoma mansoni]gi|353231762|emb|CCD79117.1| putative annexin [Schistosoma mansoni]
	Treg_001730	177	165	123	183	0	1	2	3	-8.79	3.57e-81	gi|331269999|ref|YP_004396491.1| cytidine deaminase [Clostridium botulinum BKT015925]gi|503491347|ref|WP_013726008.1| cytidine deaminase [Clostridium botulinum]gi|329126549|gb|AEB76494.1| cytidine deaminase [Clostridium botulinum BKT015925]
	Treg_010231	24685.7	31137.1	13724.3	30541.4	645.9	848.4	917.3	768.6	-8.77	2.51e-80	gi|256076391|ref|XP_002574496.1| glycerol-3-phosphate dehydrogenase [Schistosoma mansoni]gi|238659702|emb|CAZ30729.1| glycerol-3-phosphate dehydrogenase, putative [Schistosoma mansoni]
	Treg_003340	13	8	5	9	0	0	0	0	-8.76	3.62e-24	gi|256089465|ref|XP_002580830.1| hypothetical protein [Schistosoma mansoni]
	Treg_000523	2788.6	2751.6	1655.4	2793.2	4	4	6	5	-8.75	1.66e-120	gi|256088402|ref|XP_002580327.1| CAI-2 protein [Schistosoma mansoni]gi|350646068|emb|CCD59245.1| CAI-2 protein , putative [Schistosoma mansoni]
	Treg_002525	32	30	16	34	0	0	0	0	-8.73	1.05e-22	NO HIT
	Treg_003603	25986.6	21849.7	22028.8	25827.7	388	377.1	241.2	348.6	-8.7	1.76e-117	NO HIT
	Treg_005707	309.3	269.1	161.2	287.8	1.3	1.2	1.3	2.4	-8.61	3.48e-86	NO HIT
	Treg_002830	40	15	37	25	0	0	0	0	-8.59	6.49e-19	gi|157389026|gb|ABO09814.2| venom allergen-like protein 10 [Schistosoma mansoni]
	Treg_002372	114	171	82	152	0	0	1	0	-8.57	1.94e-70	gi|256082783|ref|XP_002577632.1| ectopic virus integration site [Schistosoma mansoni]gi|353230216|emb|CCD76387.1| putative zinc finger domain protein [Schistosoma mansoni]
	Treg_002038	32.4	28.9	34.5	52.1	0	0	0	0	-8.57	2.56e-23	gi|226489611|emb|CAX74956.1| Endothelin-converting enzyme 1 [Schistosoma japonicum]
	Treg_000346	16920	12226	9140	18304	147	188	196	168	-8.56	1.22e-188	gi|226482506|emb|CAX73852.1| asparaginyl-tRNA synthetase [Schistosoma japonicum]
	Treg_003307	27	23	9	19	0	0	0	0	-8.56	8.9e-19	NO HIT
	Treg_017922	29	24	28	56	0	0	0	0	-8.5	7.93e-21	gi|256086787|ref|XP_002579569.1| hypothetical protein [Schistosoma mansoni]
	Treg_003665	18.9	8.5	13.2	13.7	0	0	0	0	-8.45	4.3e-22	NO HIT
	Treg_002060	306	220	193	320	2	1	3	3	-8.41	4.97e-104	gi|360044239|emb|CCD81786.1| glycine dehydrogenase (decarboxylating) [Schistosoma mansoni]
	Treg_003136	16	8	15	14	0	0	0	0	-8.4	5.87e-21	NO HIT
	Treg_000730	1525	1181	1187	1525	17	11	16	16	-8.39	6.34e-156	gi|76154819|gb|AAX26231.2| SJCHGC03325 protein [Schistosoma japonicum]
	Treg_000273	619	209	228	280	1	0	0	0	-8.36	1.95e-64	NO HIT
	Treg_000008	34.1	26.6	18.1	33.9	0	1	0	0	-8.3	8.3e-34	NO HIT
	Treg_002470	7	12	6	7	0	0	0	0	-8.3	1.2e-19	gi|256075008|ref|XP_002573813.1| oxalate:formate antiporter [Schistosoma mansoni]
	Treg_003617	787.3	391.1	719.1	851	5	11	11	5	-8.3	3.68e-132	NO HIT
	Treg_002978	7	9	5	9	0	0	0	0	-8.28	2.61e-20	NO HIT
	Treg_020476	7000.4	8804.3	4601.5	6923.9	54.2	94.6	105.6	67.6	-8.28	3.74e-153	NO HIT
	Treg_001172	60	48	54	61	0	1	1	0	-8.27	8.52e-48	gi|226488975|emb|CAX74837.1| hypothetical protein [Schistosoma japonicum]gi|226488981|emb|CAX74840.1| hypothetical protein [Schistosoma japonicum]
	Treg_000115	4315.2	2443.5	2578.4	4055.3	6.5	12.7	17.2	3.6	-8.23	8.72e-121	gi|256078245|ref|XP_002575407.1| hypothetical protein [Schistosoma mansoni]gi|353230396|emb|CCD76567.1| hypothetical protein Smp_144240 [Schistosoma mansoni]
	Treg_001307	924	718	559	1194	1	2	1	5	-8.23	5.16e-111	gi|256077417|ref|XP_002575001.1| hypothetical protein [Schistosoma mansoni]
	Treg_000786	255	231	205	261	4	4	3	4	-8.13	9.26e-125	gi|256083892|ref|XP_002578169.1| hypothetical protein [Schistosoma mansoni]gi|350646242|emb|CCD59076.1| neuropeptide Y precursor,putative [Schistosoma mansoni]
	Treg_003997	601	666	503	799	1	1	2	4	-8.05	5.18e-98	gi|76162535|gb|AAX30441.2| SJCHGC03649 protein [Schistosoma japonicum]
	Treg_005223	13	19	14	23	0	0	0	0	-8.01	8.13e-17	gi|360043824|emb|CCD81370.1| unnamed protein product [Schistosoma mansoni]
	Treg_000072	5587	7615	2969	6304	86	104	112	83	-7.97	1.74e-100	gi|256080956|ref|XP_002576741.1| thioredoxin 2 [Schistosoma mansoni]gi|50402589|gb|AAT76629.1| thioredoxin 2 [Schistosoma mansoni]gi|360044995|emb|CCD82543.1| Thioredoxin, Trx2 [Schistosoma mansoni]
	Treg_003740	1160	1153.1	727.3	1046.4	23.6	57.6	5.7	32	-7.97	2.63e-79	gi|256071474|ref|XP_002572065.1| phosphoenolpyruvate carboxykinase [Schistosoma mansoni]gi|353229703|emb|CCD75874.1| putative phosphoenolpyruvate carboxykinase [Schistosoma mansoni]
	Treg_001179	37.2	22.7	34.6	47.2	1.6	0	0	0	-7.94	1.13e-40	gi|256079153|ref|XP_002575854.1| hypothetical protein [Schistosoma mansoni]gi|353230920|emb|CCD77337.1| hypothetical protein Smp_045360.3 [Schistosoma mansoni]
	Treg_002440	14	21	13	18	0	0	0	0	-7.93	9.72e-16	NO HIT
	Treg_000016	61674.3	53177.4	34018.5	62103.1	651.7	769.6	655.5	538.9	-7.93	1.89e-178	gi|226481459|emb|CAX73627.1| arginine kinase [Schistosoma japonicum]
	Treg_000240	683.9	351.2	563.3	839.4	3.4	13.2	11.1	9.2	-7.88	2.4e-126	gi|29841304|gb|AAP06336.1| hypothetical protein [Schistosoma japonicum]
	Treg_004582	40	30	37	27	0	2	1	0	-7.87	4.78e-27	gi|360043819|emb|CCD81365.1| unnamed protein product [Schistosoma mansoni]
	Treg_004619	104	58	69	63	0	0	1	0	-7.85	5.71e-77	gi|256085960|ref|XP_002579176.1| hypothetical protein [Schistosoma mansoni]gi|353233128|emb|CCD80483.1| hypothetical protein Smp_165660 [Schistosoma mansoni]
	Treg_002370	91.4	56.7	57.4	88.6	2	0	0	2	-7.84	3.92e-58	gi|226481623|emb|CAX73709.1| Sushi/SCR/CCP,domain-containing protein [Schistosoma japonicum]
	Treg_000018	20382.5	10160	8977.7	14835	182.7	342.2	319.6	351.8	-7.75	9.38e-100	gi|353230362|emb|CCD76533.1| putative atp:guanidino kinase (Smc74) [Schistosoma mansoni]
	Treg_002586	4	5	4	4	0	0	0	0	-7.73	3.63e-15	NO HIT
	Treg_000095	1339.7	955.4	730.1	1099	11.2	26.7	16	20.8	-7.56	5.51e-119	NO HIT
	Treg_005329	7161.8	5639.4	5739.1	6710.6	205.7	220.4	141.8	229.9	-7.5	9.62e-127	NO HIT
	Treg_000272	9148	9392	6390	10083	105	126	131	119	-7.48	2.62e-132	gi|256082096|ref|XP_002577298.1| arginase [Schistosoma mansoni]gi|41393747|gb|AAP94031.1| arginase [Schistosoma mansoni]gi|353229313|emb|CCD75484.1| putative arginase [Schistosoma mansoni]
	Treg_000287	2050	1559	1512	2392	31	34	45	36	-7.46	1.21e-152	gi|256077425|ref|XP_002575005.1| glycerol kinase [Schistosoma mansoni]
	Treg_000948	2132	2031	1615	2484	15	11	20	6	-7.24	5.63e-98	gi|76153902|gb|AAX25471.2| SJCHGC05509 protein [Schistosoma japonicum]
	Treg_004206	84.9	21.9	142.9	106.3	0	4.8	0	0	-7.2	1.64e-24	NO HIT
	Treg_000214	62.8	56.6	39.5	65.8	0	1	0	1	-7.08	5.64e-66	gi|256088823|ref|XP_002580523.1| calcium-binding protein [Schistosoma mansoni]gi|1711398|sp|Q07167.1|SM16_SCHMA RecName: Full=16 kDa calcium-binding protein; AltName: Full=Egg antigen SME16gi|294856|gb|AAA29859.1| calcium-binding protein, partial [Schistosoma mansoni]
	Treg_003720	4599	5207	3170	5464	95	114	168	135	-7.06	6.07e-75	gi|56755291|gb|AAW25825.1| SJCHGC02336 protein [Schistosoma japonicum]
	Treg_003790	9294	9435	5452	9275	513	554	655	551	-7.06	3.3e-90	gi|29841046|gb|AAP06059.1| SJCHGC01855 protein [Schistosoma japonicum]gi|226474338|emb|CAX71655.1| BAR,domain-containing protein [Schistosoma japonicum]
	Treg_003668	859	919	580	794	0	1	6	1	-7.05	1.62e-78	NO HIT
	Treg_004230	702.4	440.6	433.4	762.8	11.4	16.4	17.5	17.6	-7.05	3.12e-139	gi|256073308|ref|XP_002572973.1| choline/ethanolamine kinase [Schistosoma mansoni]gi|360043552|emb|CCD78965.1| putative choline/ethanolamine kinase [Schistosoma mansoni]
	Treg_000097	50	42.9	12.5	25.5	0	0	0	2.1	-7.04	8.35e-20	NO HIT
	Treg_001830	22.6	22.5	23.8	53.1	0	0	0	1	-7.04	2.44e-39	NO HIT
	Treg_000615	5313.7	4997	3863.2	5954.1	170.9	194.1	186.3	141.8	-6.93	2.44e-134	gi|358333287|dbj|GAA42671.2| oxalate:formate antiporter [Clonorchis sinensis]
	Treg_000015	9445.3	1666.4	4931.8	7051.8	242.2	244.8	327	214.5	-6.91	1.52e-58	gi|353230362|emb|CCD76533.1| putative atp:guanidino kinase (Smc74) [Schistosoma mansoni]
	Treg_004993	166	104	102	121	3	2	5	4	-6.9	2.92e-84	gi|56753471|gb|AAW24939.1| SJCHGC05089 protein [Schistosoma japonicum]
	Treg_001435	210.9	86.4	160.2	262.2	0	10.2	0	11	-6.9	6.99e-76	gi|256086242|ref|XP_002579311.1| hypothetical protein [Schistosoma mansoni]
	Treg_000297	15948	9326	10449	19403	189	191	169	190	-6.87	2.85e-140	gi|256077845|ref|XP_002575210.1| map kinase phosphatase [Schistosoma mansoni]gi|360044658|emb|CCD82206.1| putative map kinase phosphatase [Schistosoma mansoni]
	Treg_000048	44979.5	30908.6	27959.2	41874.4	1852.4	1967.6	2026.9	1663	-6.82	5.6e-58	gi|256088022|ref|XP_002580159.1| glutamine synthetase 1 2 (glutamate-amonia ligase) (gs) [Schistosoma mansoni]gi|353230130|emb|CCD76301.1| putative glutamine synthetase 1, 2 (glutamate-amonia ligase) (gs) [Schistosoma mansoni]
	Treg_001400	389	445	349	462	20	30	18	20	-6.78	1.23e-93	gi|256077665|ref|XP_002575122.1| epididymal membrane protein E9-related [Schistosoma mansoni]gi|353230698|emb|CCD77115.1| epididymal membrane protein E9-related [Schistosoma mansoni]
	Treg_001353	154.7	157.8	127.9	208.2	3	6.9	9.5	12.9	-6.75	1.02e-82	gi|256087497|ref|XP_002579905.1| d-amino acid oxidase [Schistosoma mansoni]gi|353230574|emb|CCD76991.1| putative d-amino acid oxidase [Schistosoma mansoni]
	Treg_003050	18	32	29	24	0	0	1	1	-6.73	8.18e-23	gi|358333112|dbj|GAA51685.1| hypothetical protein CLF_106621 [Clonorchis sinensis]
	Treg_002577	41	13	34	29	1	0	0	2	-6.62	1.85e-19	gi|358335867|dbj|GAA54466.1| guanine nucleotide binding protein (G protein) alpha inhibiting activity polypeptide [Clonorchis sinensis]
	Treg_000020	590.4	218	587.1	611.3	23.5	39	37.3	27.4	-6.6	6.46e-63	gi|391358187|sp|P16641.3|KTRC_SCHMA RecName: Full=Taurocyamine kinase; AltName: Full=ATP:guanidino kinase Smc74; AltName: Full=ATP:guanidino phosphotransferase; Short=SmGK
	Treg_004154	79	86	57	94	4	8	1	1	-6.6	1.32e-53	gi|256083969|ref|XP_002578207.1| TATA-binding protein-associated phosphoprotein [Schistosoma mansoni]
	Treg_002129	32	41	25	29	2	0	1	3	-6.56	9.37e-31	gi|256085490|ref|XP_002578954.1| ank repeat-containing [Schistosoma mansoni]gi|353233526|emb|CCD80881.1| putative ank repeat-containing [Schistosoma mansoni]
	Treg_000879	52.5	65.8	35.9	81.7	1	0	0	0	-6.54	3.38e-40	NO HIT
	Treg_001584	299	296	215	321	13	16	13	6	-6.51	1.35e-98	gi|256078079|ref|XP_002575325.1| hypothetical protein [Schistosoma mansoni]
	Treg_008398	21986	13164	13351	21928	1940	2315	2199	1993	-6.5	1.1e-54	gi|358341698|dbj|GAA43144.2| calponin-3 [Clonorchis sinensis]
	Treg_001512	52	52	64	48	0	0	2	1	-6.5	1.2e-53	gi|226480544|emb|CAX73369.1| hypothetical protein [Schistosoma japonicum]
	Treg_000024	72.7	39.4	52.8	37.3	1	1	2	2	-6.49	3e-24	NO HIT
	Treg_000313	27959.5	20458.5	16681.5	26997.5	1012.4	1144.3	1090	983.4	-6.48	1.34e-76	gi|256071474|ref|XP_002572065.1| phosphoenolpyruvate carboxykinase [Schistosoma mansoni]gi|353229703|emb|CCD75874.1| putative phosphoenolpyruvate carboxykinase [Schistosoma mansoni]
	Treg_002369	53.6	43.3	30.6	49.4	0	4	2	0	-6.45	6.57e-36	gi|226481621|emb|CAX73708.1| Sushi/SCR/CCP,domain-containing protein [Schistosoma japonicum]
	Treg_003580	11242.8	10284.2	6275.8	13364.3	437.2	477.4	746.6	629	-6.43	4e-106	gi|29841093|gb|AAP06106.1| similar to XM_053164 citrate synthase precursor in Homo sapiens [Schistosoma japonicum]
	Treg_003829	51.5	23.5	35	55.8	1.8	4.4	1.5	0	-6.43	2.54e-31	gi|256082114|ref|XP_002577307.1| protein kinase [Schistosoma mansoni]
	Treg_000295	13740	12406	8037	16301	285	382	341	333	-6.41	1.85e-139	gi|256083038|ref|XP_002577757.1| lim domain [Schistosoma mansoni]gi|353231267|emb|CCD77685.1| putative lim domain [Schistosoma mansoni]
	Treg_003803	608.7	168.4	802.5	776.5	22.7	36.8	25.8	34.3	-6.37	3.99e-47	NO HIT
	Treg_000751	2935	3459	2399	3401	98	86	119	108	-6.36	9.1e-111	gi|256089068|ref|XP_002580639.1| P25 alpha-related [Schistosoma mansoni]gi|350646774|emb|CCD58495.1| P25 alpha-related [Schistosoma mansoni]
	Treg_015169	21591.4	17693.9	15349.5	26085.6	1056.9	1389.7	1310	1143.1	-6.34	1.88e-100	gi|358336203|dbj|GAA31628.2| cysteine and glycine-rich protein [Clonorchis sinensis]
	Treg_007853	4251.4	6230.2	3288	5210	224.4	213.7	250	228.7	-6.33	1.34e-107	gi|226471076|emb|CAX70619.1| Heat shock protein 67B2 [Schistosoma japonicum]gi|226471078|emb|CAX70620.1| Heat shock protein 67B2 [Schistosoma japonicum]
	Treg_002517	30	10	21	37	2	0	0	0	-6.32	5.31e-28	NO HIT
	Treg_006772	35796.1	33780.9	20189.1	37900.4	1857.9	2327.1	2327.8	1917.1	-6.29	2.58e-101	gi|56759284|gb|AAW27782.1| SJCHGC00653 protein [Schistosoma japonicum]
	Treg_000975	86	40	58	82	4	5	4	2	-6.27	5.9e-64	NO HIT
	Treg_019539	29	38	14	35	1	1	2	0	-6.26	2.38e-18	NO HIT
	Treg_001926	61	40	38	38	0	3	3	1	-6.26	1.1e-36	gi|256078075|ref|XP_002575323.1| calbindin-32 [Schistosoma mansoni]gi|360045378|emb|CCD82926.1| putative calbindin-32 [Schistosoma mansoni]
	Treg_000366	3163	2145	3124	3284	108	130	149	138	-6.24	2.56e-135	gi|256086226|ref|XP_002579303.1| guanosine-diphosphatase [Schistosoma mansoni]gi|238664730|emb|CAZ35542.1| guanosine-diphosphatase, putative [Schistosoma mansoni]
	Treg_001141	20	14	26	18	0	2	1	0	-6.24	8.33e-22	gi|226482672|emb|CAX73935.1| TNF receptor-associated factor 3 [Schistosoma japonicum]
	Treg_003684	88.8	65.7	100.6	125.5	2.9	14.7	0	3.4	-6.24	1.35e-42	gi|256079139|ref|XP_002575847.1| hypothetical protein [Schistosoma mansoni]gi|353230928|emb|CCD77345.1| hypothetical protein Smp_045250 [Schistosoma mansoni]
	Treg_000549	13	20	14	22	0	0	1	0	-6.22	1.57e-30	NO HIT
	Treg_003820	335.4	116.4	311.5	258.7	1.1	3.4	3.3	3.2	-6.22	8.31e-92	gi|256084835|ref|XP_002578631.1| hypothetical protein [Schistosoma mansoni]gi|238664011|emb|CAZ34869.1| conserved Schistosoma protein, unknown function [Schistosoma mansoni]
	Treg_001738	55	73	70	69	4	7	2	7	-6.22	1.97e-38	gi|256056764|ref|XP_002570235.1| short chain dehydrogenase [Schistosoma mansoni]gi|360045338|emb|CCD82886.1| putative short chain dehydrogenase [Schistosoma mansoni]
	Treg_000025	57.4	47.5	39.8	43.5	2.2	0	5.3	3.4	-6.2	6.37e-32	NO HIT
	Treg_019613	103	115	90	124	3	7	7	8	-6.19	2.18e-53	gi|56754227|gb|AAW25301.1| SJCHGC05612 protein [Schistosoma japonicum]
	Treg_000356	37	44	25	58	0	2	1	0	-6.19	1.23e-45	gi|226472322|emb|CAX77197.1| hypothetical protein [Schistosoma japonicum]gi|226472330|emb|CAX77201.1| hypothetical protein [Schistosoma japonicum]gi|226472332|emb|CAX77202.1| hypothetical protein [Schistosoma japonicum]gi|226472334|emb|CAX77203.1| hypothetical protein [Schistosoma japonicum]
	Treg_000448	3373	3356	2289	4422	282	368	339	298	-6.17	1.44e-93	gi|226487568|emb|CAX74654.1| Loss of heterozygosity 11 chromosomal region 2 gene A protein homolog [Schistosoma japonicum]
	Treg_000471	1283	914	1009	1144	12	26	15	14	-6.16	4.2e-109	gi|256092978|ref|XP_002582154.1| hypothetical protein [Schistosoma mansoni]gi|353228786|emb|CCD74957.1| hypothetical protein Smp_035550 [Schistosoma mansoni]
	Treg_001352	37.3	27.2	25.1	60.8	0	1.1	2.5	1.1	-6.16	2.84e-31	gi|256087497|ref|XP_002579905.1| d-amino acid oxidase [Schistosoma mansoni]gi|353230574|emb|CCD76991.1| putative d-amino acid oxidase [Schistosoma mansoni]
	Treg_004248	74.2	17.9	62.6	85.2	3.8	0	0	8.3	-6.15	2.85e-28	gi|76155583|gb|AAX26875.2| SJCHGC03720 protein [Schistosoma japonicum]
	Treg_000353	84.4	49.1	81.4	81.7	1.1	7.8	3.4	7.7	-6.08	9.36e-43	gi|76155493|gb|AAX26785.2| SJCHGC05057 protein [Schistosoma japonicum]
	Treg_002992	37	33	46	33	1	1	4	1	-6	9.53e-25	gi|360044536|emb|CCD82084.1| hypothetical protein Smp_088090 [Schistosoma mansoni]
	Treg_001683	28	59.7	24.8	36.8	3.1	4.6	1.7	4.4	-5.98	8.46e-19	gi|60603294|gb|AAX28104.1| unknown [Schistosoma japonicum]
	Treg_008788	955.2	1626.3	769.2	1589.8	80.4	119.7	107.2	99.7	-5.98	8.57e-61	gi|360044006|emb|CCD81552.1| putative carbonyl reductase [Schistosoma mansoni]
	Treg_000519	42.1	65.5	58.6	91.9	2.8	0	2.7	0	-5.98	5.42e-40	gi|353232816|emb|CCD80172.1| unnamed protein product [Schistosoma mansoni]
	Treg_001555	52	41	55	81	2	0	0	0	-5.97	1.28e-28	NO HIT
	Treg_003899	692	927	556	862	12	16	13	14	-5.96	3.48e-70	NO HIT
	Treg_004153	82	69	62	88	0	4	5	4	-5.94	4.18e-42	gi|226490162|emb|CAX69323.1| Leishmanolysin homolog precursor [Schistosoma japonicum]
	Treg_002611	18	17	24	22	1	0	0	1	-5.93	2.25e-35	NO HIT
	Treg_003742	329.2	135.3	423.1	405	12.8	36.4	1.6	17.7	-5.93	9.41e-34	gi|56753812|gb|AAW25103.1| SJCHGC06900 protein [Schistosoma japonicum]
	Treg_003911	259.3	42.5	297.2	214.6	8.3	17.4	14.6	11.4	-5.93	5.52e-29	gi|226480822|emb|CAX73508.1| Ubiquitin carboxyl-terminal hydrolase 2 [Schistosoma japonicum]
	Treg_003719	6773	4492	5265	6248	76	93	89	94	-5.93	1.35e-128	gi|350646749|emb|CCD58470.1| hypothetical protein Smp_137360 [Schistosoma mansoni]
	Treg_003886	4046	5971	2734	5367	257	311	391	237	-5.89	1.11e-85	NO HIT
	Treg_003591	99.3	18.3	94.6	88.1	0	9.1	5.6	7.1	-5.88	5.35e-23	gi|353230362|emb|CCD76533.1| putative atp:guanidino kinase (Smc74) [Schistosoma mansoni]
	Treg_005350	279.7	87.5	404.1	295.4	8	16.1	10.1	7.5	-5.83	8.63e-37	gi|256079141|ref|XP_002575848.1| 5-aminolevulinic acid synthase [Schistosoma mansoni]gi|353230927|emb|CCD77344.1| 5-aminolevulinic acid synthase [Schistosoma mansoni]
	Treg_000036	3136	2980.7	2109.9	2772.2	163.3	210.8	165.3	136.8	-5.82	1.87e-82	gi|256052744|ref|XP_002569912.1| crp1/csrp1/crip1 [Schistosoma mansoni]gi|353232209|emb|CCD79564.1| putative crp1/csrp1/crip1 [Schistosoma mansoni]
	Treg_009469	12307	3641	8306	12695	659	752	611	697	-5.82	5.87e-60	gi|353231110|emb|CCD77528.1| hypothetical protein Smp_156510 [Schistosoma mansoni]
	Treg_003594	493.5	201.6	383.4	432	22.6	36	19.3	30.6	-5.79	3.98e-85	gi|76155391|gb|AAX26674.2| SJCHGC06211 protein [Schistosoma japonicum]
	Treg_000665	590	400	400	479	33	42	32	31	-5.78	5.49e-112	gi|256078150|ref|XP_002575360.1| dynein light intermediate chain [Schistosoma mansoni]
	Treg_004909	22	21	16	18	0	1	0	1	-5.78	1.1e-35	NO HIT
	Treg_003674	2685.6	3618.3	1816.8	2727.3	192.8	178.9	185.9	115.6	-5.77	3.85e-58	NO HIT
	Treg_003818	163	76.1	161.3	215.6	6	18.6	8.3	10.8	-5.73	1.69e-70	gi|358332882|dbj|GAA51478.1| spondin-1 [Clonorchis sinensis]
	Treg_002722	80.4	43.5	28.9	46.5	7.9	2.3	2.3	0	-5.7	1.16e-22	gi|256083739|ref|XP_002578096.1| hypothetical protein [Schistosoma mansoni]gi|360044927|emb|CCD82475.1| putative hypothetical protein [Schistosoma mansoni]
	Treg_003762	235.8	190.3	147.3	231.3	20	18	14	8	-5.69	1.79e-83	gi|256075345|ref|XP_002573980.1| Calcium-binding protein 2 (CaBP2) [Schistosoma mansoni]gi|360044816|emb|CCD82364.1| putative calcium-binding protein 2 (CaBP2) [Schistosoma mansoni]
	Treg_000469	1153.9	738	815.9	1178.6	78.9	89	66.7	109.5	-5.66	6.76e-102	gi|256073918|ref|XP_002573274.1| hypothetical protein [Schistosoma mansoni]gi|360042762|emb|CCD78172.1| hypothetical protein Smp_132210 [Schistosoma mansoni]
	Treg_000800	938.3	1198.5	626.5	979.3	7	14	6	7	-5.65	1.72e-90	NO HIT
	Treg_008370	16156	15827	12390	16962	1602	1830	2064	1672	-5.65	4.85e-86	gi|353232899|emb|CCD80254.1| putative annexin [Schistosoma mansoni]
	Treg_000887	3650	4609	2772	4112	304	330	436	360	-5.64	2.99e-92	gi|256076895|ref|XP_002574744.1| L-lactate dehydrogenase [Schistosoma mansoni]gi|360044086|emb|CCD81633.1| putative l-lactate dehydrogenase [Schistosoma mansoni]
	Treg_000616	50.8	15.3	43.7	49.5	3.5	2.8	3.4	0	-5.64	2.61e-22	gi|226477892|emb|CAX72653.1| oxalate/formate antiporter [Schistosoma japonicum]
	Treg_000347	5949.3	5177.8	2184.1	3976.5	58.6	93.1	73.6	68	-5.61	8.57e-58	gi|256076393|ref|XP_002574497.1| glycerol-3-phosphate dehydrogenase [Schistosoma mansoni]gi|238659703|emb|CAZ30730.1| glycerol-3-phosphate dehydrogenase, putative [Schistosoma mansoni]
	Treg_000927	1936	2234	1387	3038	202	298	349	240	-5.6	6.61e-77	gi|257206598|emb|CAX82927.1| glycerol-3-phosphate dehydrogenase [Schistosoma japonicum]
	Treg_005452	54.5	18	58.1	70	3	7.2	4.2	3.1	-5.59	4.49e-25	gi|256071075|ref|XP_002571867.1| hypothetical protein [Schistosoma mansoni]gi|353228572|emb|CCD74743.1| hypothetical protein Smp_124340 [Schistosoma mansoni]
	Treg_003773	2866	2546	1728	3336	198	244	289	272	-5.58	9.27e-74	gi|256071858|ref|XP_002572255.1| alanine aminotransferase [Schistosoma mansoni]gi|360043820|emb|CCD81366.1| putative alanine aminotransferase [Schistosoma mansoni]
	Treg_000013	71824.2	172375	1.15342e+06	242198	18476.1	14997.4	9595.6	11078.3	-5.57	1.7358133676108e-3gi|84579145|dbj|BAE73006.1|	hypothetical protein [Macaca fascicularis]
	Treg_001210	701.5	395.3	470.6	898.5	27.1	90.9	61	45.2	-5.5	9.02e-65	gi|256066445|ref|XP_002570518.1| glycolipid transfer protein-related [Schistosoma mansoni]
	Treg_005751	4465.9	4010	3207.9	4722.2	299	313.9	319	275	-5.5	2.43e-81	gi|56754259|gb|AAW25317.1| SJCHGC01155 protein [Schistosoma japonicum]
	Treg_003815	3948	3704	2625	4409	316	408	390	361	-5.48	4.8e-90	gi|256070323|ref|XP_002571492.1| D2013.10 [Schistosoma mansoni]gi|350646276|emb|CCD59002.1| D2013.10 [Schistosoma mansoni]
	Treg_000566	367.2	303.2	305.9	419.7	34.1	48.4	64.2	21	-5.48	6.94e-90	gi|226482342|emb|CAX73770.1| Islet cell autoantigen 1 [Schistosoma japonicum]
	Treg_000447	1100.4	227.2	786	925.5	70.8	101	60	55.1	-5.47	2.58e-44	gi|256088471|ref|XP_002580358.1| protein phosphatase pp2a regulatory subunit B [Schistosoma mansoni]gi|238665920|emb|CAZ36597.1| protein phosphatase pp2a regulatory subunit B,putative [Schistosoma mansoni]
	Treg_010611	2153.1	1128.3	1533	2180.8	148	156	188	176	-5.47	1.01e-108	gi|256080570|ref|XP_002576553.1| alpha-amylase [Schistosoma mansoni]
	Treg_007881	9191	13045	7513	11567	862	1012	1274	868	-5.47	1.53e-46	gi|226475308|emb|CAX71942.1| tryparedoxin peroxidase [Schistosoma japonicum]
	Treg_001892	91	34	54	76	7	5	11	7	-5.46	2.21e-35	NO HIT
	Treg_000831	2325	1151	1616	2283	128	151	98	113	-5.45	3.61e-102	gi|353233214|emb|CCD80569.1| hypothetical protein Smp_172460 [Schistosoma mansoni]
	Treg_001946	104	12	110	104	6	5	2	11	-5.42	2.2e-17	gi|226483537|emb|CAX74069.1| Headcase protein [Schistosoma japonicum]
	Treg_001487	113.4	67.7	58.9	113	20.9	5.9	0	0	-5.42	5.85e-21	gi|353230899|emb|CCD77316.1| putative rap gtpase-activating protein [Schistosoma mansoni]
	Treg_002839	43	18	34	32	2	4	2	4	-5.42	1.39e-32	gi|256075658|ref|XP_002574134.1| GTP cyclohydrolase I [Schistosoma mansoni]gi|360043436|emb|CCD78849.1| GTP cyclohydrolase I [Schistosoma mansoni]
	Treg_003105	12	11	9	18	0	3	1	1	-5.41	1.79e-20	gi|349942073|dbj|GAA29911.1| plastin-1 [Clonorchis sinensis]
	Treg_000496	663	587	465	699	52	77	66	63	-5.4	1.65e-89	gi|256071674|ref|XP_002572164.1| DNA photolyase [Schistosoma mansoni]gi|353229929|emb|CCD76100.1| putative DNA photolyase [Schistosoma mansoni]
	Treg_000438	9388.1	7981.6	5686.3	10052.1	1436.2	1713.2	1812.9	1319.7	-5.38	2.35e-81	gi|29841010|gb|AAP06023.1| SJCHGC06138 protein [Schistosoma japonicum]gi|226486972|emb|CAX75351.1| S-phase kinase-associated protein 1A [Schistosoma japonicum]gi|226486974|emb|CAX75352.1| S-phase kinase-associated protein 1A [Schistosoma japonicum]
	Treg_000322	5405.3	3884.3	4259.1	6082.6	258.4	254.6	266.6	237.6	-5.36	7.31e-114	gi|256075010|ref|XP_002573814.1| oxalate:formate antiporter [Schistosoma mansoni]gi|360043925|emb|CCD81471.1| putative oxalate:formate antiporter [Schistosoma mansoni]
	Treg_017778	1327	1252	875	1196	10	12	19	14	-5.35	1.07e-97	NO HIT
	Treg_001244	79.3	33.1	81.9	66.3	5.7	8	5.6	11	-5.35	3.12e-32	gi|76156360|gb|AAX27572.2| SJCHGC09561 protein [Schistosoma japonicum]
	Treg_003917	5610	6506	3572	7878	502	662	621	537	-5.34	4.49e-55	gi|226478858|emb|CAX72924.1| Ts translation elongation factor, mitochondrial [Schistosoma japonicum]
	Treg_000129	109.7	53.5	113.8	96.9	11.6	12.2	11.7	8.2	-5.34	8.3e-47	gi|29841466|gb|AAP06498.1| similar to GenBank Accession Number Z29075 myophilin antigen in Echinococcus granulosus [Schistosoma japonicum]gi|48596229|gb|AAT46028.1| myophilin-like protein [Echinococcus granulosus]gi|226467099|emb|CAX76030.1| Myophilin [Schistosoma japonicum]
	Treg_003777	2623.1	1366.7	1239.7	2456.9	196	112.6	85.8	160.7	-5.32	2.52e-46	gi|256052491|ref|XP_002569800.1| calponin homolog [Schistosoma mansoni]gi|350646635|emb|CCD58662.1| calponin homolog, putative [Schistosoma mansoni]
	Treg_001923	8	5	7	8	0	0	0	1	-5.31	2.01e-21	NO HIT
	Treg_001679	109.1	71.7	58.9	69	1.6	4	5	0	-5.31	1.05e-48	gi|350644922|emb|CCD60383.1| hypothetical protein Smp_179410 [Schistosoma mansoni]
	Treg_000890	2413	2590	1954	2879	245	213	242	215	-5.31	2.39e-101	gi|256079198|ref|XP_002575876.1| annexin [Schistosoma mansoni]gi|353231759|emb|CCD79114.1| putative annexin [Schistosoma mansoni]
	Treg_001745	254	64	176	187	9	18	14	29	-5.3	1.12e-35	gi|256081753|ref|XP_002577132.1| hypothetical protein [Schistosoma mansoni]gi|360044663|emb|CCD82211.1| hypothetical protein Smp_153600 [Schistosoma mansoni]
	Treg_002740	29	28	18	29	0	4	3	5	-5.3	8.12e-28	gi|358336873|dbj|GAA55327.1| peroxiredoxin (alkyl hydroperoxide reductase subunit C) [Clonorchis sinensis]
	Treg_000818	1922	1739	1209	2319	223	269	330	282	-5.29	2.55e-82	gi|257205632|emb|CAX82467.1| Long-chain-fatty-acid--CoA ligase 5 [Schistosoma japonicum]gi|257205646|emb|CAX82474.1| Long-chain-fatty-acid--CoA ligase 5 [Schistosoma japonicum]
	Treg_004360	61.8	19.5	83	96	10	0	0	0	-5.29	3.1e-07	gi|226483537|emb|CAX74069.1| Headcase protein [Schistosoma japonicum]
	Treg_000348	583.1	521.4	694.9	1133	83.9	168	148.7	99.8	-5.28	2.13e-68	gi|56757954|gb|AAW27117.1| SJCHGC01663 protein [Schistosoma japonicum]
	Treg_003864	28.7	34.9	39.6	21.7	2.4	2.5	0	3.1	-5.27	6.75e-21	gi|226477892|emb|CAX72653.1| oxalate/formate antiporter [Schistosoma japonicum]
	Treg_018327	372.7	583.9	304.9	631.9	39.6	36	53.4	39.7	-5.24	3.67e-48	gi|256076889|ref|XP_002574741.1| calmodulin [Schistosoma mansoni]gi|360044083|emb|CCD81630.1| similar to 16 kDa calcium-binding protein [Schistosoma mansoni]
	Treg_010868	1948	1669	1599	2180	35	66	58	54	-5.24	1.54e-93	gi|256052612|ref|XP_002569856.1| uridine phosphorylase [Schistosoma mansoni]gi|360042691|emb|CCD78101.1| putative uridine phosphorylase [Schistosoma mansoni]
	Treg_002689	57	41	53	49	1	2	2	2	-5.21	1.39e-56	gi|256079013|ref|XP_002575786.1| calcium-binding protein [Schistosoma mansoni]gi|360043977|emb|CCD81523.1| putative calcium-binding protein [Schistosoma mansoni]
	Treg_003866	220.2	98.4	280.7	292.5	30.1	23.3	6.5	16.2	-5.2	4.48e-40	gi|226477892|emb|CAX72653.1| oxalate/formate antiporter [Schistosoma japonicum]
	Treg_005473	282	293	202	409	29	30	41	33	-5.19	6.69e-72	gi|256087106|ref|XP_002579718.1| hypothetical protein [Schistosoma mansoni]gi|353231141|emb|CCD77559.1| hypothetical protein Smp_169050 [Schistosoma mansoni]
	Treg_004080	728.8	421.9	464.6	891.6	20.9	11.4	19.8	20.2	-5.19	8.92e-81	gi|256071079|ref|XP_002571869.1| carbonic anhydrase [Schistosoma mansoni]gi|353228570|emb|CCD74741.1| putative carbonic anhydrase [Schistosoma mansoni]
	Treg_015540	3645	4515.4	2848.6	4399.8	694.8	873.8	766.1	650.3	-5.18	3.5e-48	gi|256052152|ref|XP_002569641.1| skp1-related [Schistosoma mansoni]
	Treg_000587	49.5	59.6	38.5	67.1	0	15.9	5.8	0.7	-5.15	1.29e-22	gi|256072068|ref|XP_002572359.1| phospholipid scramblase 1 [Schistosoma mansoni]
	Treg_001834	611	717	508	728	85	144	142	121	-5.15	3.76e-77	gi|226468082|emb|CAX76268.1| putative Retinol dehydrogenase 11 [Schistosoma japonicum]
	Treg_015929	3947.4	4424	3091.2	4894.7	799.3	857.2	958.4	797.7	-5.14	2.38e-70	gi|256072875|ref|XP_002572759.1| inosine-5-monophosphate dehydrogenase [Schistosoma mansoni]gi|353229128|emb|CCD75299.1| putative inosine-5-monophosphate dehydrogenase [Schistosoma mansoni]
	Treg_003685	56.3	25.9	65.6	82.5	5.1	0	8.3	3.7	-5.13	2.71e-21	gi|226487582|emb|CAX74661.1| Dehydrogenase/reductase SDR family member 1 [Schistosoma japonicum]
	Treg_004854	43	35	91	48	2	6	9	6	-5.12	3.46e-19	NO HIT
	Treg_010847	1126	1098	749	1174	72	190	203	148	-5.12	4.31e-60	gi|256075960|ref|XP_002574283.1| threonine dehydratase/deaminase [Schistosoma mansoni]
	Treg_000227	1585	1582	942	2204	45	51	52	55	-5.1	8.45e-70	gi|256080903|ref|XP_002576715.1| retinal rod rhodopsin-sensitive cgmp 3'5'-cyclic phosphodiesterase [Schistosoma mansoni]gi|350645361|emb|CCD59984.1| retinal rod rhodopsin-sensitive cgmp 3',5'-cyclic phosphodiesterase, putative [Schistosoma mansoni]
	Treg_006235	16898.2	19034.3	11147	20459.3	2703.6	3565.3	3460.6	2609.4	-5.1	2.21e-79	gi|226475346|emb|CAX71961.1| Aldolase [Schistosoma japonicum]
	Treg_001177	306	205	188	342	2	13	11	15	-5.08	5.34e-54	gi|349972945|dbj|GAA31871.1| protein kinase A [Clonorchis sinensis]
	Treg_006411	5313.3	6649.8	3944.8	6034.2	563.7	695.1	833.1	661.7	-5.07	1.5e-58	gi|226468440|emb|CAX69897.1| Protein FAM82B [Schistosoma japonicum]
	Treg_003890	427	194	316	435	38	40	23	34	-5.07	9.6e-81	gi|76153405|gb|AAX25034.2| SJCHGC06715 protein [Schistosoma japonicum]
	Treg_003986	88.8	68.9	88.6	114.6	5.9	16.6	2.9	18.7	-5.07	7.58e-39	gi|256074089|ref|XP_002573359.1| eh domain containing/past-1-related [Schistosoma mansoni]gi|350646820|emb|CCD58541.1| eh domain containing/past-1-related [Schistosoma mansoni]
	Treg_006048	869.3	1002.4	581.5	901.2	62.7	83.6	124.3	46.2	-5.06	2.04e-47	gi|56754531|gb|AAW25453.1| SJCHGC02549 protein [Schistosoma japonicum]
	Treg_011449	2317	1706	1513	2930	247	306	251	243	-5.06	1.53e-92	gi|256082024|ref|XP_002577263.1| adenylsulfate kinase [Schistosoma mansoni]gi|353233284|emb|CCD80639.1| putative adenylsulfate kinase [Schistosoma mansoni]
	Treg_005828	16.5	34.2	61.1	17.2	12.2	0	0	0	-5.06	3.8e-08	gi|256071714|ref|XP_002572184.1| hypothetical protein [Schistosoma mansoni]
	Treg_001685	212.8	89.1	166.8	261.9	23.5	17	36.7	19.3	-5.04	7.9e-48	gi|350644504|emb|CCD60770.1| hypothetical protein Smp_199070 [Schistosoma mansoni]
	Treg_002183	102	71	107	95	4	4	2	5	-5.03	1.83e-65	gi|226479994|emb|CAX73293.1| hypothetical protein [Schistosoma japonicum]
	Treg_005382	1920	2085.2	865.2	1726.8	148	149.1	199	113	-5.02	5.73e-40	gi|256075349|ref|XP_002573982.1| calmodulin [Schistosoma mansoni]
	Treg_000003	10015.8	4280.1	4779.2	8297.4	827.7	1039.9	848.5	769.1	-5.02	8.33e-55	gi|29841093|gb|AAP06106.1| similar to XM_053164 citrate synthase precursor in Homo sapiens [Schistosoma japonicum]
	Treg_015894	26862	10583	17716	22219	4100	5015	4628	4129	-5	5.33e-12	gi|256090608|ref|XP_002581276.1| titin [Schistosoma mansoni]gi|353229606|emb|CCD75777.1| putative titin [Schistosoma mansoni]
	Treg_001703	81	96	74	98	6	12	6	2	-5	1.1e-35	gi|256081491|ref|XP_002577003.1| hypothetical protein [Schistosoma mansoni]gi|353229464|emb|CCD75635.1| hypothetical protein Smp_057060 [Schistosoma mansoni]
	Treg_014894	287.6	286.8	218.3	285.1	33.2	24.4	41.8	31.9	-4.98	9.14e-75	gi|226484492|emb|CAX74155.1| Protein FAM82B [Schistosoma japonicum]
	Treg_000468	2608.1	1950	1790.1	2989.4	174.1	214	216.3	174.5	-4.96	3.03e-101	gi|29841270|gb|AAP06302.1| similar to GenBank Accession Number AE003544 CG11658 gene product in Drosophila melanogaster [Schistosoma japonicum]
	Treg_016442	20563.6	15406.4	14473	20949.5	1637.6	2033	1970.4	1628.5	-4.95	6.55e-104	gi|4104873|gb|AAD11976.1| calponin homolog [Schistosoma japonicum]
	Treg_003807	273.5	250.7	219.2	257.5	17.9	14.8	5.2	4.6	-4.94	5.93e-52	gi|358334884|dbj|GAA53302.1| nicotinamide riboside kinase 1 [Clonorchis sinensis]
	Treg_005343	556	424	378	520	46	50	47	48	-4.94	1.58e-94	gi|226469968|emb|CAX70265.1| SDR1 protein [Schistosoma japonicum]
	Treg_000582	1159	1258	765	1236	122	158	186	191	-4.93	7.67e-53	gi|256053005|ref|XP_002570007.1| cd63 antigen-like [Schistosoma mansoni]gi|353231401|emb|CCD77819.1| cd63 antigen-like [Schistosoma mansoni]
	Treg_005398	111.3	44.5	80.3	111.6	13.2	22.1	6.6	0	-4.92	4.17e-25	gi|350644569|emb|CCD60690.1| hypothetical protein Smp_174850 [Schistosoma mansoni]
	Treg_000130	225.8	82.4	275.2	182.4	19.2	39.4	10.2	23.4	-4.91	1.11e-36	gi|29841466|gb|AAP06498.1| similar to GenBank Accession Number Z29075 myophilin antigen in Echinococcus granulosus [Schistosoma japonicum]gi|48596229|gb|AAT46028.1| myophilin-like protein [Echinococcus granulosus]gi|226467099|emb|CAX76030.1| Myophilin [Schistosoma japonicum]
	Treg_000445	220.3	52	313.3	213.4	33.7	42.2	17.8	35.7	-4.91	5.22e-22	NO HIT
	Treg_001235	3274	5426	2533	5008	434	608	568	451	-4.91	1.16e-65	gi|29841291|gb|AAP06323.1| SJCHGC06193 protein [Schistosoma japonicum]gi|226469862|emb|CAX70212.1| hypothetical protein [Schistosoma japonicum]gi|226487676|emb|CAX74708.1| hypothetical protein [Schistosoma japonicum]gi|226487678|emb|CAX74709.1| hypothetical protein [Schistosoma japonicum]
	Treg_005408	1820.6	539.7	1557.1	1924.5	125.3	131.8	128.9	149.5	-4.91	1.59e-65	gi|226480822|emb|CAX73508.1| Ubiquitin carboxyl-terminal hydrolase 2 [Schistosoma japonicum]
	Treg_004789	80.1	21	74	48	8	12.4	2	8	-4.9	5.8e-24	NO HIT
	Treg_005357	5259.8	1489.2	3807.2	6724.6	396.2	540.2	358.5	419.5	-4.9	3.11e-47	gi|353229246|emb|CCD75417.1| hypothetical protein Smp_161790.1 [Schistosoma mansoni]
	Treg_003615	4095	4694	2683	4787	1038	1036	1179	849	-4.9	5.39e-39	gi|256071198|ref|XP_002571928.1| interferon-related developmental regulator-related [Schistosoma mansoni]gi|353231407|emb|CCD77825.1| interferon-related developmental regulator-related [Schistosoma mansoni]
	Treg_000223	10908	7031	7484	11073	1098	1381	1165	1067	-4.89	2.15e-63	gi|349917426|dbj|GAA28195.1| sarcoplasmic calcium-binding protein [Clonorchis sinensis]
	Treg_003789	3777	2324	3128	4433	674	871	760	705	-4.87	2.12e-101	gi|358336879|dbj|GAA55333.1| glycogen debranching enzyme, partial [Clonorchis sinensis]
	Treg_003642	19.7	34.7	17	22.7	4.2	0	0	5	-4.86	2.49e-13	gi|256062491|ref|XP_002570340.1| Antolefinin (Antolefinine) [Schistosoma mansoni]gi|353232143|emb|CCD79498.1| putative antolefinin (Antolefinine) [Schistosoma mansoni]
	Treg_001160	39.5	77.1	47.1	55.9	5.9	12.7	8.1	8	-4.86	1.47e-26	gi|256071484|ref|XP_002572070.1| hypothetical protein [Schistosoma mansoni]gi|353229698|emb|CCD75869.1| hypothetical protein Smp_005960 [Schistosoma mansoni]
	Treg_000392	315.6	114	260.9	378.4	23	7.7	6.9	6.6	-4.84	1.47e-40	gi|226479230|emb|CAX73110.1| putative Eps8 [Schistosoma japonicum]
	Treg_000396	14296	5626	9277	11605	396	555	478	477	-4.84	4.92e-86	gi|256072851|ref|XP_002572747.1| four and A half lim domains [Schistosoma mansoni]gi|353229113|emb|CCD75284.1| putative four and A half lim domains [Schistosoma mansoni]
	Treg_001634	672	664	596	852	108	109	125	96	-4.84	4.41e-82	gi|56753609|gb|AAW25007.1| SJCHGC08973 protein [Schistosoma japonicum]
	Treg_002399	93	79	42	91	8	17	14	13	-4.84	8.38e-32	gi|226480732|emb|CAX73463.1| hypothetical protein [Schistosoma japonicum]
	Treg_000211	4301	6158.4	3653.9	5286.7	501.4	766.3	841.2	566.9	-4.82	2.46e-50	gi|256071789|ref|XP_002572221.1| hypothetical protein [Schistosoma mansoni]gi|360043800|emb|CCD81346.1| hypothetical protein Smp_007450.1 [Schistosoma mansoni]
	Treg_012242	145.6	95.5	77.3	96.6	0	2	1	3	-4.82	6.5e-35	NO HIT
	Treg_003119	30	22	21	31	1	2	3	0	-4.82	8.72e-34	gi|556521914|emb|CDJ25210.1| hypothetical protein EgrG_000391100 [Echinococcus granulosus]
	Treg_000221	160.7	27.6	115.4	154.7	7.9	15	26.7	11.5	-4.82	3.24e-21	gi|353233603|emb|CCD80957.1| hypothetical protein Smp_003270 [Schistosoma mansoni]
	Treg_003821	288.7	197.5	185.4	284.1	32	26.4	43	25.9	-4.81	1.42e-69	gi|56757918|gb|AAW27099.1| SJCHGC06797 protein [Schistosoma japonicum]
	Treg_001071	2689	2162	2197	2863	268	278	313	274	-4.81	1.27e-96	gi|56757702|gb|AAW26992.1| SJCHGC06586 protein [Schistosoma japonicum]
	Treg_000517	10086.9	9194	5798	11444.9	589.9	791.4	710.9	625.7	-4.81	6.37e-85	gi|56753748|gb|AAW25071.1| SJCHGC06340 protein [Schistosoma japonicum]
	Treg_002654	67	60	38.4	58.7	4	1	4	1	-4.8	2.28e-35	gi|353228487|emb|CCD74658.1| putative macroglobulin/complement [Schistosoma mansoni]
	Treg_000577	897	339	681	711	21	31	20	34	-4.79	1.72e-78	gi|256080772|ref|XP_002576651.1| hypothetical protein [Schistosoma mansoni]gi|353232050|emb|CCD79405.1| hypothetical protein Smp_150830 [Schistosoma mansoni]
	Treg_005530	48.9	55.3	40.1	43	3.4	0	0	6	-4.79	2.89e-14	gi|350644922|emb|CCD60383.1| hypothetical protein Smp_179410 [Schistosoma mansoni]
	Treg_001659	366.9	362	213.8	383.6	28.7	41.5	51	34.1	-4.78	3.39e-62	gi|56754389|gb|AAW25382.1| SJCHGC03376 protein [Schistosoma japonicum]
	Treg_005775	70.8	42.7	101.3	136.6	13.5	7.2	15.5	12.8	-4.78	7.05e-26	gi|256079438|ref|XP_002575994.1| hypothetical protein [Schistosoma mansoni]gi|353231246|emb|CCD77664.1| putative wd40 protein [Schistosoma mansoni]
	Treg_001038	37	17	24	44	1	2	2	2	-4.75	3.72e-37	gi|256084530|ref|XP_002578481.1| hypothetical protein [Schistosoma mansoni]gi|353229237|emb|CCD75408.1| hypothetical protein Smp_161770 [Schistosoma mansoni]
	Treg_002184	232	46	120	105	15	17	20	17	-4.75	1.31e-35	gi|256074933|ref|XP_002573776.1| hypothetical protein [Schistosoma mansoni]
	Treg_002163	77	44	69	90	5	4	2	3	-4.73	2.31e-56	gi|256079098|ref|XP_002575827.1| hypothetical protein [Schistosoma mansoni]gi|360044016|emb|CCD81562.1| hypothetical protein Smp_146470 [Schistosoma mansoni]
	Treg_003652	6323.6	6846.2	4312.1	7762.7	878	1133.8	1080.4	850.4	-4.72	3.81e-60	gi|76154755|gb|AAX26177.2| SJCHGC09515 protein [Schistosoma japonicum]
	Treg_007088	28.5	15.9	28.9	142.7	10.9	0	14.5	0	-4.72	3.19e-08	gi|56758158|gb|AAW27219.1| SJCHGC06288 protein [Schistosoma japonicum]
	Treg_000157	45.6	3.7	61.4	50.4	1.6	14.4	0	6.4	-4.7	1.58e-09	gi|256078729|ref|XP_002575647.1| hexokinase [Schistosoma mansoni]gi|18277270|sp|Q26609.2|HXK_SCHMA RecName: Full=Hexokinasegi|157830239|pdb|1BDG|A Chain A, Hexokinase From Schistosoma Mansoni Complexed With Glucosegi|11387389|gb|AAA29894.2| hexokinase [Schistosoma mansoni]gi|353232005|emb|CCD79360.1| hexokinase [Schistosoma mansoni]
	Treg_004547	82	58	72	62	1	13	4	7	-4.69	4.82e-28	NO HIT
	Treg_004019	6315.5	2750.5	5067.6	7706.4	733	911.5	800.8	702.6	-4.68	3.32e-77	gi|256071914|ref|XP_002572283.1| tensin [Schistosoma mansoni]
	Treg_010282	1011	1138	672	1469	47	37	61	37	-4.68	2.9e-51	gi|56758786|gb|AAW27533.1| unknown [Schistosoma japonicum]
	Treg_001082	523	409	304	567	24	30	13	21	-4.66	3.23e-65	gi|226467642|emb|CAX69697.1| hypothetical protein [Schistosoma japonicum]
	Treg_000029	8783	5355	5533	11054	895	1138	1040	1008	-4.65	1.64e-85	gi|226480678|emb|CAX73436.1| succinate-Coenzyme A ligase, ADP-forming, beta subunit [Schistosoma japonicum]
	Treg_007243	48217	66603	24545	55832	4682	5930	6202	4804	-4.64	5e-69	gi|56754309|gb|AAW25342.1| SJCHGC02792 protein [Schistosoma japonicum]gi|226475158|emb|CAX71873.1| ATP:ADP antiporter [Schistosoma japonicum]gi|226475160|emb|CAX71874.1| ATP:ADP antiporter [Schistosoma japonicum]gi|226475162|emb|CAX71875.1| ATP:ADP antiporter [Schistosoma japonicum]gi|226475168|emb|CAX71878.1| ATP:ADP antiporter [Schistosoma japonicum]gi|226477322|emb|CAX78314.1| ATP:ADP antiport…
	Treg_017953	2383	2239	1595	2863	382	429	388	380	-4.62	6.92e-55	gi|56753175|gb|AAW24797.1| SJCHGC04876 protein [Schistosoma japonicum]
	Treg_016089	4361	3245	3258	5200	445	505	469	440	-4.62	4.23e-97	gi|256085085|ref|XP_002578754.1| hypothetical protein [Schistosoma mansoni]gi|350646179|emb|CCD59163.1| hypothetical protein Smp_075770 [Schistosoma mansoni]
	Treg_000861	1279	764	821	1423	150	164	203	171	-4.62	3.03e-84	gi|256072226|ref|XP_002572437.1| diacylglycerol O-acyltransferase 1 [Schistosoma mansoni]
	Treg_002175	252.3	104.3	133.8	245.9	32.1	38	46.4	21.8	-4.6	1.75e-46	gi|256081511|ref|XP_002577013.1| sodium/calcium exchanger [Schistosoma mansoni]gi|353229476|emb|CCD75647.1| putative sodium/calcium exchanger [Schistosoma mansoni]
	Treg_016398	5546	3461.9	4271.7	6044.4	1198	1468.4	1408.7	1270.2	-4.6	5.97e-81	gi|358332882|dbj|GAA51478.1| spondin-1 [Clonorchis sinensis]
	Treg_000298	6774	3733	4397	7473	527	718	655	618	-4.6	3.48e-88	gi|256077230|ref|XP_002574910.1| alpha-actinin [Schistosoma mansoni]gi|353229042|emb|CCD75213.1| putative alpha-actinin [Schistosoma mansoni]
	Treg_020847	370	44.1	379.5	361.6	33.1	68.4	55.2	53	-4.59	1.49e-19	gi|256090720|ref|XP_002581330.1| nuclear lim interactor-interacting factor (nli-interacting factor) (nli-if) [Schistosoma mansoni]gi|353230271|emb|CCD76442.1| putative nuclear lim interactor-interacting factor (nli-interacting factor) (nli-if) [Schistosoma mansoni]
	Treg_000692	237	93	208	222	13	8	10	13	-4.57	7.44e-66	NO HIT
	Treg_002591	66	17	65	57	6	6	8	9	-4.57	7.7e-18	gi|256077258|ref|XP_002574924.1| hypothetical protein [Schistosoma mansoni]gi|353229057|emb|CCD75228.1| hypothetical protein Smp_034680 [Schistosoma mansoni]
	Treg_004634	20.7	4.7	67.8	27.6	0	0	0	4	-4.56	2.49e-06	NO HIT
	Treg_003880	242.6	227.9	175.8	234.2	28.8	34.8	34.6	37.7	-4.56	8.53e-73	gi|256080535|ref|XP_002576536.1| TRABID protein (C64 family) [Schistosoma mansoni]gi|360043106|emb|CCD78518.1| TRABID protein (C64 family) [Schistosoma mansoni]
	Treg_002609	600	481	517	771	88	68	74	84	-4.55	1.02e-73	gi|256087106|ref|XP_002579718.1| hypothetical protein [Schistosoma mansoni]gi|353231141|emb|CCD77559.1| hypothetical protein Smp_169050 [Schistosoma mansoni]
	Treg_000066	1154.4	1221.4	911.9	1413.5	190.5	183.1	228.1	190.2	-4.53	2.18e-72	gi|186462281|gb|ACC78612.1| fructose bisphosphate aldolase [Schistosoma bovis]
	Treg_000740	920	720	461	831	148	167	166	91	-4.53	2.23e-49	NO HIT
	Treg_003708	114.4	8.5	137	109.5	13.7	18.8	11	16.7	-4.53	4.05e-15	gi|256084546|ref|XP_002578489.1| hypothetical protein [Schistosoma mansoni]
	Treg_003756	677	622	496	887	87	99	100	106	-4.53	1.4e-84	gi|360044518|emb|CCD82066.1| putative choline dehydrogenase [Schistosoma mansoni]
	Treg_000139	3987	4753	3212	5282	652	888	798	662	-4.53	2.33e-78	gi|256083078|ref|XP_002577777.1| serine/threonine protein kinase [Schistosoma mansoni]gi|353231287|emb|CCD77705.1| serine/threonine kinase [Schistosoma mansoni]
	Treg_003761	66.2	29.9	84.3	97.6	11.6	5.1	4.3	4.6	-4.53	1.74e-22	gi|256072875|ref|XP_002572759.1| inosine-5-monophosphate dehydrogenase [Schistosoma mansoni]gi|353229128|emb|CCD75299.1| putative inosine-5-monophosphate dehydrogenase [Schistosoma mansoni]
	Treg_000454	3290.5	3457.3	2375.8	3365.5	157.1	169.2	200.8	149.4	-4.51	2.39e-69	gi|358334884|dbj|GAA53302.1| nicotinamide riboside kinase 1 [Clonorchis sinensis]
	Treg_003673	10239.9	11965.4	7113.7	13804	722.5	873.8	875.2	801.8	-4.51	6.2e-66	gi|29841411|gb|AAP06443.1|SJCHGC06823 protein [Schistosoma japonicum]gi|226468042|emb|CAX76248.1| Gamma-aminobutyric acid receptor-associated protein-like 2 [Schistosoma japonicum]gi|226468044|emb|CAX76249.1| Gamma-aminobutyric acid receptor-associated protein-like 2 [Schistosoma japonicum]gi|226468046|emb|CAX76250.1| Gamma-aminobutyric acid receptor-associated protein-like 2 [Schistosoma japonic…
	Treg_003776	521.3	469.9	381.3	533.6	56.4	70.4	74.8	72.8	-4.49	3.1e-78	gi|4104873|gb|AAD11976.1| calponin homolog [Schistosoma japonicum]
	Treg_003588	28630	43154	17431	27710	3728	4720	5734	3887	-4.48	2.61e-57	gi|256083535|ref|XP_002577998.1| fibrillin 2 [Schistosoma mansoni]gi|353231661|emb|CCD79016.1| putative fibrillin 2 [Schistosoma mansoni]
	Treg_001368	786	808	744	1007	104	140	118	152	-4.48	4.19e-84	gi|256052709|ref|XP_002569896.1| adenylate cyclase [Schistosoma mansoni]
	Treg_011012	2177.4	1289.1	1581.2	2372.8	328.2	394.2	326.4	347.3	-4.47	1.2e-86	gi|256080535|ref|XP_002576536.1| TRABID protein (C64 family) [Schistosoma mansoni]gi|360043106|emb|CCD78518.1| TRABID protein (C64 family) [Schistosoma mansoni]
	Treg_003930	1346.4	932.1	966	1665.4	246	257.9	267	165.4	-4.45	3.85e-70	gi|256084214|ref|XP_002578326.1| adenylate kinase [Schistosoma mansoni]gi|353229153|emb|CCD75324.1| putative adenylate kinase [Schistosoma mansoni]
	Treg_000617	95.6	37.3	82.8	80.6	4.6	24.8	10.6	17	-4.45	8.72e-25	gi|358342685|dbj|GAA50134.1| monocarboxylate transporter 14 [Clonorchis sinensis]
	Treg_020257	339.2	290	264.8	363	79.8	114	21.1	74.4	-4.45	8.29e-39	gi|256076937|ref|XP_002574765.1| double-stranded rna-binding protein zn72d [Schistosoma mansoni]
	Treg_000235	10666.5	12272	7638.6	12231.9	1598.9	1951.5	1901.6	1494	-4.43	3.5e-56	gi|226471034|emb|CAX70598.1| ornithine aminotransferase [Schistosoma japonicum]gi|226471036|emb|CAX70599.1| ornithine aminotransferase [Schistosoma japonicum]gi|226487328|emb|CAX75529.1| ornithine aminotransferase [Schistosoma japonicum]gi|226487330|emb|CAX75530.1| ornithine aminotransferase [Schistosoma japonicum]gi|226487332|emb|CAX75531.1| ornithine aminotransferase [Schistosoma japonicum]
	Treg_000213	379.3	133.5	272.1	361.7	51.2	70.7	43.2	57.3	-4.43	3.27e-48	gi|56756901|gb|AAW26622.1| SJCHGC01809 protein [Schistosoma japonicum]
	Treg_000529	1900.1	622.3	1595.2	1348.2	166.1	670.8	347.9	239.4	-4.43	1.25e-21	gi|350645955|emb|CCD59362.1| protein phosphatase 1 regulatory subunit 12b (myosin phosphatase targeting subunit 2), putative [Schistosoma mansoni]
	Treg_005351	3957.3	4853.9	2493	5258.8	677.3	791.6	866.8	641.1	-4.43	5.55e-50	gi|256079141|ref|XP_002575848.1| 5-aminolevulinic acid synthase [Schistosoma mansoni]gi|353230927|emb|CCD77344.1| 5-aminolevulinic acid synthase [Schistosoma mansoni]
	Treg_001305	343.1	48.4	327.7	318	63.6	73.7	35.5	67.4	-4.42	6.48e-18	gi|358339585|dbj|GAA47620.1| solute carrier family 12 member 6 [Clonorchis sinensis]
	Treg_008765	1424	1042	1051	1621	303	332	385	353	-4.42	3.1e-83	gi|56755409|gb|AAW25884.1| SJCHGC06350 protein [Schistosoma japonicum]
	Treg_001441	303	279	184	348	31	62	92	49	-4.41	1.71e-45	gi|226480080|emb|CAX73336.1| hypothetical protein [Schistosoma japonicum]
	Treg_000156	107.9	17	101.2	96.2	13.7	21.4	6.6	18.1	-4.4	4.49e-15	gi|256078729|ref|XP_002575647.1| hexokinase [Schistosoma mansoni]gi|18277270|sp|Q26609.2|HXK_SCHMA RecName: Full=Hexokinasegi|157830239|pdb|1BDG|A Chain A, Hexokinase From Schistosoma Mansoni Complexed With Glucosegi|11387389|gb|AAA29894.2| hexokinase [Schistosoma mansoni]gi|353232005|emb|CCD79360.1| hexokinase [Schistosoma mansoni]
	Treg_004119	105	21.9	64.4	63	0	0	10.4	0	-4.4	4.71e-05	gi|76154381|gb|AAX25868.2| SJCHGC06937 protein [Schistosoma japonicum]
	Treg_003644	1569.1	1151.9	909.3	1202.1	166.9	201.5	130.7	199.9	-4.39	1.28e-56	NO HIT
	Treg_000186	5767	5662	4125	6023	703	811	907	715	-4.39	5.48e-61	gi|56757942|gb|AAW27111.1| SJCHGC08995 protein [Schistosoma japonicum]
	Treg_005221	10	24	6	14	6	6	1	0	-4.39	5.24e-11	gi|256077470|ref|XP_002575027.1| hypothetical protein [Schistosoma mansoni]gi|360043948|emb|CCD81494.1| hypothetical protein Smp_036670 [Schistosoma mansoni]
	Treg_000371	3124	3152	2181	3852	325	409	401	336	-4.38	3.62e-76	gi|56758724|gb|AAW27502.1| SJCHGC02194 protein [Schistosoma japonicum]
	Treg_000276	3053	3018	2204	3193	491	598	614	505	-4.38	8.81e-54	gi|56753381|gb|AAW24894.1| SJCHGC05721 protein [Schistosoma japonicum]
	Treg_002366	63	73	43	66	10	15	12	13	-4.38	5.91e-33	gi|256081591|ref|XP_002577052.1| hypothetical protein [Schistosoma mansoni]
	Treg_003982	309.4	50.9	357.7	214.5	40.3	54.3	37.8	41.1	-4.37	1.53e-22	NO HIT
	Treg_007666	960	1009	764	1022	178	224	257	234	-4.37	1.4e-71	gi|256070413|ref|XP_002571537.1| ornithine transporter 2 (solute carrier family 25 member 2) [Schistosoma mansoni]gi|350645322|emb|CCD59945.1| ornithine transporter 2 (solute carrier family 25 member 2) [Schistosoma mansoni]
	Treg_003362	1640	2226	1281	2717	469	609	596	523	-4.36	4.32e-43	gi|256080086|ref|XP_002576314.1| NAD dehydrogenase [Schistosoma mansoni]gi|350646021|emb|CCD59298.1| NAD dehydrogenase, putative [Schistosoma mansoni]
	Treg_004669	35	20	32	48	2	4	2	1	-4.36	7.76e-34	gi|556982704|ref|XP_005997595.1| PREDICTED: leucine-rich repeat-containing protein 72 isoform X1 [Latimeria chalumnae]
	Treg_000343	5483	6841	3680	7635	1676	2212	2052	1808	-4.36	3.28e-45	gi|226482326|emb|CAX73762.1| Ubiquinol-cytochrome-c reductase complex core protein 2, mitochondrial precursor [Schistosoma japonicum]gi|226482328|emb|CAX73763.1| Ubiquinol-cytochrome-c reductase complex core protein 2, mitochondrial precursor [Schistosoma japonicum]
	Treg_000686	90.7	22.2	113.2	154.8	9.7	13.3	0	32.8	-4.34	1.47e-10	gi|76154339|gb|AAX25827.2| SJCHGC09098 protein [Schistosoma japonicum]
	Treg_000758	3163	3764	2139	4788	964	1188	1147	956	-4.34	4.62e-39	gi|256074868|ref|XP_002573744.1| unc-13 (munc13) [Schistosoma mansoni]
	Treg_000842	1018	672	698	1246	174	208	191	176	-4.33	7.69e-80	gi|350646530|emb|CCD58840.1| fbxl4, putative [Schistosoma mansoni]
	Treg_000872	913	596	771	936	35	42.7	55.2	51	-4.33	3.29e-76	gi|553727571|emb|CDI70539.1| expressed conserved protein [Echinococcus multilocularis]
	Treg_000289	1445	872	950	1235	52	77	54	73	-4.33	9.64e-77	gi|256080474|ref|XP_002576506.1| hypothetical protein [Schistosoma mansoni]gi|353231718|emb|CCD79073.1| hypothetical protein Smp_150030 [Schistosoma mansoni]
	Treg_001205	398	410	313	533	50	61	74	68	-4.3	9.38e-68	gi|353232903|emb|CCD80258.1| crp-related [Schistosoma mansoni]
	Treg_009149	8496.7	6333.7	5451.2	8802.8	683.9	820.2	870.7	695.8	-4.3	5.14e-84	gi|29841304|gb|AAP06336.1| hypothetical protein [Schistosoma japonicum]
	Treg_005823	44.5	23.8	30.9	22.5	18.7	0	0	0	-4.3	2.86e-06	gi|257206694|emb|CAX82975.1| SID1 transmembrane family member 1 precursor [Schistosoma japonicum]
	Treg_003796	2251	2990	1628	2938	511	579	571	486	-4.3	5.3e-38	gi|256085345|ref|XP_002578882.1| nitrogen fixation protein nifu [Schistosoma mansoni]gi|360045568|emb|CCD83116.1| putative nitrogen fixation protein nifu [Schistosoma mansoni]
	Treg_000198	2371.7	2437.7	1592.8	2655	504.9	589.9	659.4	613.8	-4.3	3.45e-61	gi|256083510|ref|XP_002577986.1| programmed cell death protein [Schistosoma mansoni]gi|350645071|emb|CCD60197.1| programmed cell death protein, putative [Schistosoma mansoni]
	Treg_001209	272.5	246.7	141.4	317.5	42.9	25.1	54	37.8	-4.28	1.95e-43	gi|256066445|ref|XP_002570518.1| glycolipid transfer protein-related [Schistosoma mansoni]
	Treg_001901	36.8	23.3	29.2	55	8.7	4.4	6.9	4.4	-4.27	3.92e-21	gi|555934003|emb|CDJ11122.1| Zinc finger, RING type [Hymenolepis microstoma]
	Treg_000586	1251	1450.4	755.7	1698.2	157	205.1	225.2	179.8	-4.27	6.15e-47	gi|256072068|ref|XP_002572359.1| phospholipid scramblase 1 [Schistosoma mansoni]
	Treg_002615	74	61	55	62	5	4	7	4	-4.26	4.69e-49	gi|256079118|ref|XP_002575837.1| hypothetical protein [Schistosoma mansoni]
	Treg_000210	10134.1	12335.9	5878.8	12600.2	1278.2	1643	1698.1	1354.6	-4.26	6.41e-64	gi|360044419|emb|CCD81967.1| putative pyruvate dehydrogenase [Schistosoma mansoni]
	Treg_001525	270.5	156	174	287.3	30.6	68.6	24.6	24.3	-4.26	8.59e-49	gi|256087277|ref|XP_002579799.1| hypothetical protein [Schistosoma mansoni]gi|360043499|emb|CCD78912.1| hypothetical protein Smp_169700.2 [Schistosoma mansoni]
	Treg_004002	668.3	776	555.4	822.3	133.5	198.6	220.7	191.2	-4.26	5.14e-65	gi|256079241|ref|XP_002575897.1| Exosome complex exonuclease RRP43 [Schistosoma mansoni]gi|350645838|emb|CCD59477.1| Exosome complex exonuclease RRP43, putative [Schistosoma mansoni]
	Treg_001195	368	386	286	494	17	30	31	30	-4.25	1.9e-60	NO HIT
	Treg_004784	49.1	26.2	37.4	47.2	5.3	5	10.6	5.4	-4.25	7.71e-30	gi|76155403|gb|AAX26687.2| SJCHGC09167 protein [Schistosoma japonicum]
	Treg_003636	237.8	152	165.1	242.6	21.1	36.3	43.9	31.8	-4.25	2.08e-71	gi|405975232|gb|EKC39813.1| hypothetical protein CGI_10025367 [Crassostrea gigas]
	Treg_000106	17426	20627	11439	22420	1697	1951	2318	1586	-4.25	4.21e-40	gi|29841130|gb|AAP06143.1| SJCHGC06082 protein [Schistosoma japonicum]gi|226468854|emb|CAX76455.1| Cytochrome c proximal [Schistosoma japonicum]gi|226468856|emb|CAX76456.1| Cytochrome c proximal [Schistosoma japonicum]gi|226468858|emb|CAX76457.1| Cytochrome c proximal [Schistosoma japonicum]gi|226468860|emb|CAX76458.1| Cytochrome c proximal [Schistosoma japonicum]gi|226468862|emb|CAX76459.1| Cyto…
	Treg_008933	1548	1347	1031	1840	220	308	282	281	-4.25	3.75e-78	gi|256083781|ref|XP_002578116.1| Mername-AA248 (C02 family) [Schistosoma mansoni]gi|353228551|emb|CCD74722.1| Mername-AA248 (C02 family) [Schistosoma mansoni]
	Treg_004125	209	188.5	142.7	198.4	45.9	57.4	45.3	40.8	-4.24	9.8e-58	gi|556515322|emb|CDJ18551.1| nicotinamide mononucleotide adenylyltransferase [Echinococcus granulosus]
	Treg_015353	6820	9510	4471	8605	1435	2063	1820	1410	-4.24	3.9e-52	gi|256086569|ref|XP_002579470.1| hypothetical protein [Schistosoma mansoni]gi|353229673|emb|CCD75844.1| hypothetical protein Smp_083710 [Schistosoma mansoni]
	Treg_000433	1550.9	1743.2	1087.9	1947.8	380	493.9	525.7	392.9	-4.24	6.09e-59	gi|256080486|ref|XP_002576512.1| f-box only protein [Schistosoma mansoni]gi|353231711|emb|CCD79066.1| putative f-box only protein [Schistosoma mansoni]
	Treg_000119	56145	62451	32160	55611	19213	21673	23900	17596	-4.24	2.66e-29	gi|226472934|emb|CAX71153.1| Actin 5C [Schistosoma japonicum]
	Treg_001972	282	409	259	379	77	79	87	74	-4.23	1.54e-45	NO HIT
	Treg_003732	1067	1049	668	1342	183	243	222	191	-4.23	2.97e-67	gi|256073455|ref|XP_002573046.1| atpase n2b [Schistosoma mansoni]
	Treg_000757	102	17	85	65	12	17	12	16	-4.23	6.75e-20	gi|256088981|ref|XP_002580598.1| GATA binding factor-1b (transcription factor xgata-1b) [Schistosoma mansoni]gi|360042778|emb|CCD78188.1| putative gata binding factor [Schistosoma mansoni]
	Treg_004541	27	11	14	17	2	2	0	2	-4.22	5.84e-23	NO HIT
	Treg_001758	35.9	0	59	59.2	0	17.6	0	8.6	-4.21	4.01e-05	gi|350644869|emb|CCD60432.1| hypothetical protein Smp_180230 [Schistosoma mansoni]
	Treg_003881	223.9	95.9	243.7	186.1	33.1	50.4	27	32.6	-4.21	1.09e-44	NO HIT
	Treg_004551	58.1	54.8	25.5	53.2	7	14.9	9.9	6.3	-4.21	1.18e-19	gi|256052504|ref|XP_002569806.1| homeobox protein [Schistosoma mansoni]
	Treg_007520	5284.8	5199.3	3353.7	7214.4	636.9	892.3	868.6	868.2	-4.21	1.29e-61	gi|226482484|emb|CAX73841.1| 1-aminocyclopropane-1-carboxylate synthase/ alanine transaminase/ transferase, transferring nitrogenous groups [Schistosoma japonicum]
	Treg_005191	27	29	18	20	2	3	6	3	-4.2	1.51e-13	NO HIT
	Treg_018052	327.9	265.9	205.1	332.4	40.3	77	39.5	36.7	-4.19	1.18e-57	gi|56754389|gb|AAW25382.1| SJCHGC03376 protein [Schistosoma japonicum]
	Treg_002138	9.4	11.6	6.5	8.5	2.6	0	3.3	1.2	-4.18	3.58e-13	gi|256077270|ref|XP_002574930.1| transcription factor mrg-related [Schistosoma mansoni]gi|353229062|emb|CCD75233.1| transcription factor mrg-related [Schistosoma mansoni]
	Treg_000138	13255	10663	8729	15294	1706	2098	2033	1926	-4.17	2.43e-68	gi|256082671|ref|XP_002577577.1| aconitate hydratase [Schistosoma mansoni]
	Treg_003953	212.5	55.6	137.4	270.5	15.9	39.1	22.7	37.3	-4.17	3.05e-27	gi|226486572|emb|CAX74363.1| solute carrier family 33 (acetyl-CoA transporter), member 1 [Schistosoma japonicum]
	Treg_005199	31	8	36	49	2	8	4	7	-4.17	2.21e-14	NO HIT
	Treg_002530	56	50	38	96	2	5	6	6	-4.16	7.07e-36	NO HIT
	Treg_005178	6	2	15	10	0	0	2	0	-4.15	1e-07	NO HIT
	Treg_005688	90.7	12.6	104.7	55.3	15.7	12.9	18.3	15.4	-4.13	1.16e-12	NO HIT
	Treg_004191	189	65	121	161	14	28	31	27	-4.13	4.19e-42	gi|256089177|ref|XP_002580691.1| camp-dependent rap1 guanine-nucleotide exchange factor [Schistosoma mansoni]
	Treg_006360	20379.8	33372.8	241754	67754.6	15499	11598.6	6761.4	9913.7	-4.12	2.25e-19	gi|84579145|dbj|BAE73006.1| hypothetical protein [Macaca fascicularis]
	Treg_001797	57	67	63	95	14	15	20	16	-4.11	2.52e-37	NO HIT
	Treg_003713	77.4	14.7	75.9	52.6	0	14.6	0	30.1	-4.11	1.07e-06	gi|29841304|gb|AAP06336.1| hypothetical protein [Schistosoma japonicum]
	Treg_001013	221.4	295	145.3	485.5	105.5	51.1	57	119.3	-4.1	4.93e-22	gi|350646119|emb|CCD59221.1| hypothetical protein Smp_151720 [Schistosoma mansoni]
	Treg_003582	6723	2369	5511	6900	1140	1167	1136	1132	-4.1	3.04e-60	gi|256070126|ref|XP_002571397.1| hypothetical protein [Schistosoma mansoni]
	Treg_010605	758	1098	636	930	220	260	314	191	-4.09	4.85e-45	gi|226488959|emb|CAX74829.1| mRNA turnover protein 4 homolog [Schistosoma japonicum]
	Treg_001864	525	360	302	489	66	75	95	78	-4.09	7.88e-71	gi|4104017|gb|AAD01923.1| tryptophan hydroxylase [Schistosoma mansoni]
	Treg_000795	544	596	465	733	140	149	161	144	-4.09	2.51e-57	gi|358340352|dbj|GAA29617.2| LAO/AO transport system kinase [Clonorchis sinensis]
	Treg_002230	444	235	401	529	67	78	74	76	-4.09	1.24e-72	gi|256085721|ref|XP_002579062.1| serine palmitoyltransferase 2 [Schistosoma mansoni]
	Treg_008210	2153.8	2903.3	1607.3	2419.5	408.6	642.5	673.7	449.4	-4.09	5.15e-32	gi|256079610|ref|XP_002576079.1| ferritin light chain [Schistosoma mansoni]gi|353230823|emb|CCD77240.1| putative ferritin [Schistosoma mansoni]
	Treg_000771	390	357	233	503	67	88	86	84	-4.08	6.93e-57	gi|226477892|emb|CAX72653.1| oxalate/formate antiporter [Schistosoma japonicum]
	Treg_006406	2399	3838	1861	3478	1017	1025	1279	830	-4.08	4.53e-26	gi|256071773|ref|XP_002572213.1| hypothetical protein [Schistosoma mansoni]gi|353229401|emb|CCD75572.1| hypothetical protein Smp_007300 [Schistosoma mansoni]
	Treg_007854	208.6	208.4	136.1	233.3	36.2	48	59.8	28.4	-4.08	2.12e-46	gi|256071791|ref|XP_002572222.1| hypothetical protein [Schistosoma mansoni]gi|360043799|emb|CCD81345.1| hypothetical protein Smp_007450.2 [Schistosoma mansoni]
	Treg_009640	2098	2574	1690	2472	386	382	475	370	-4.08	2.97e-46	gi|256052722|ref|XP_002569902.1| hypothetical protein [Schistosoma mansoni]gi|353230234|emb|CCD76405.1| hypothetical protein Smp_169200 [Schistosoma mansoni]gi|390124516|emb|CCE94319.1| tegumental antigen [Schistosoma mansoni]
	Treg_005076	8	7	9	14	0	1	1	1	-4.08	3.32e-19	gi|358340538|dbj|GAA48409.1| hypothetical protein CLF_101572 [Clonorchis sinensis]
	Treg_000065	17272.9	13645.3	9563.3	17778.4	2546.7	2317.4	3154	2922.1	-4.08	1.95e-69	gi|256078562|ref|XP_002575564.1| fructose 16-bisphosphate aldolase [Schistosoma mansoni]gi|1703248|sp|P53442.1|ALF_SCHMA RecName: Full=Fructose-bisphosphate aldolasegi|605647|gb|AAA57567.1| fructose 1,6 bisphosphate aldolase [Schistosoma mansoni]gi|2598926|gb|AAB84014.1| fructose bisphosphate aldolase [Schistosoma mansoni]gi|353232335|emb|CCD79690.1| putative fructose 1,6-bisphosphate aldolase [S…
	Treg_003897	269.4	231	189.4	344.3	54.9	61.3	43.6	30.7	-4.08	1.72e-54	gi|226483303|emb|CAX73952.1| fumarate hydratase 1 [Schistosoma japonicum]
	Treg_000791	371	494	252	434	73	92	67	65	-4.07	6.97e-38	gi|256072191|ref|XP_002572420.1| deoxycytidylate deaminase [Schistosoma mansoni]gi|353230192|emb|CCD76363.1| putative deoxycytidylate deaminase [Schistosoma mansoni]
	Treg_020306	50.3	75.9	74.7	0	41.8	0	0	0	-4.07	0.00443	gi|256084713|ref|XP_002578571.1| hypothetical protein [Schistosoma mansoni]gi|350644776|emb|CCD60530.1| hypothetical protein Smp_074000 [Schistosoma mansoni]
	Treg_000146	2720.1	1691.6	981.3	2217	408.5	448.3	627.8	403.2	-4.06	8.47e-43	gi|29841411|gb|AAP06443.1| SJCHGC06823 protein [Schistosoma japonicum]gi|226468042|emb|CAX76248.1| Gamma-aminobutyric acid receptor-associated protein-like 2 [Schistosoma japonicum]gi|226468044|emb|CAX76249.1| Gamma-aminobutyric acid receptor-associated protein-like 2 [Schistosoma japonicum]gi|226468046|emb|CAX76250.1| Gamma-aminobutyric acid receptor-associated protein-like 2 [Schistosoma japoni…
	Treg_005902	39	0	22.8	30.5	0	7.3	8	0	-4.06	1.18e-05	gi|76154248|gb|AAX25739.2| SJCHGC09232 protein [Schistosoma japonicum]
	Treg_014518	2822.9	1382.3	1995.1	3076.5	369.2	369.5	459.9	421.1	-4.06	2.51e-68	gi|256073164|ref|XP_002572902.1| sodium-dependent neurotransmitter transporter [Schistosoma mansoni]gi|353229012|emb|CCD75183.1| putative sodium-dependent neurotransmitter transporter [Schistosoma mansoni]
	Treg_001576	852	802	568	1248	257	319	377	296	-4.06	4.63e-54	gi|226487534|emb|CAX74637.1| Grave disease carrier protein homolog [Schistosoma japonicum]
	Treg_001072	911	622	656	862	202	203	168	155	-4.05	3.02e-64	gi|350645220|emb|CCD60093.1| hypothetical protein Smp_198890 [Schistosoma mansoni]
	Treg_020528	105	26.5	100.9	105.3	2	59.7	0	8.3	-4.05	1.14e-05	gi|256076088|ref|XP_002574346.1| hypothetical protein [Schistosoma mansoni]gi|360042790|emb|CCD78200.1| hypothetical protein Smp_137830 [Schistosoma mansoni]
	Treg_001021	1447	732	871	1371	177	185	237	178	-4.04	2.49e-73	gi|256074400|ref|XP_002573513.1| hypothetical protein [Schistosoma mansoni]gi|350645430|emb|CCD59878.1| hypothetical protein Smp_133370 [Schistosoma mansoni]
	Treg_004020	1903.5	810.6	1509.4	2198.6	362.1	289.5	326.2	398.5	-4.04	5.71e-56	gi|256071914|ref|XP_002572283.1| tensin [Schistosoma mansoni]
	Treg_005719	8454.9	7745.1	5957.9	8423.3	668.8	628.6	873.4	677.8	-4.04	1.08e-52	gi|353229246|emb|CCD75417.1| hypothetical protein Smp_161790.1 [Schistosoma mansoni]
	Treg_001107	18.6	14.4	13	30.8	4.3	5.8	6.7	3.6	-4.04	8.04e-15	gi|256082114|ref|XP_002577307.1| protein kinase [Schistosoma mansoni]
	Treg_001914	34.6	44.8	42.3	46.7	3	16.7	7.4	9.4	-4.04	3.29e-18	gi|256078261|ref|XP_002575415.1| cancer-associatedprotein protein [Schistosoma mansoni]gi|353230407|emb|CCD76578.1| putative cancer-associatedprotein protein [Schistosoma mansoni]
	Treg_002268	88	129	62	115	21	23	25	15	-4.04	1.6e-29	gi|226469066|emb|CAX70012.1| putative thioesterase superfamily member 2 [Schistosoma japonicum]
	Treg_000478	587	473	449	620	85	121	115	112	-4.03	5.26e-74	gi|256079525|ref|XP_002576037.1| serine/threonine protein kinase [Schistosoma mansoni]
	Treg_004245	622	277.9	578.5	784.4	145.9	176.6	100.8	130	-4.03	3.06e-44	gi|256090720|ref|XP_002581330.1| nuclear lim interactor-interacting factor (nli-interacting factor) (nli-if) [Schistosoma mansoni]gi|353230271|emb|CCD76442.1| putative nuclear lim interactor-interacting factor (nli-interacting factor) (nli-if) [Schistosoma mansoni]
	Treg_003679	11351.5	5367.2	7192.4	12681.4	2214.7	2125.2	2179.4	2000.5	-4.03	1.62e-64	gi|256078729|ref|XP_002575647.1| hexokinase [Schistosoma mansoni]gi|18277270|sp|Q26609.2|HXK_SCHMA RecName: Full=Hexokinasegi|157830239|pdb|1BDG|A Chain A, Hexokinase From Schistosoma Mansoni Complexed With Glucosegi|11387389|gb|AAA29894.2| hexokinase [Schistosoma mansoni]gi|353232005|emb|CCD79360.1| hexokinase [Schistosoma mansoni]
	Treg_001199	442.5	129.6	331.1	439	62.6	68.1	86	101.1	-4.02	5.62e-32	gi|358342859|dbj|GAA50276.1| MFS transporter PAT family beta-lactamase induction signal transducer ampG [Clonorchis sinensis]
	Treg_001549	483.5	177.8	298.1	348.9	57.8	76.9	43.2	71	-4.02	1.55e-49	gi|353230445|emb|CCD76616.1| putative nucleolar protein c7b [Schistosoma mansoni]
	Treg_002342	74	20	48	79	10	14	7	18	-4	1.68e-17	NO HIT
	Treg_000460	143.5	67.7	153.9	149.5	24.9	34	5.2	22.5	-4	2.84e-24	gi|56756146|gb|AAW26251.1| SJCHGC06778 protein [Schistosoma japonicum]
	Treg_001360	1221	719	870	1453	62	68	88	81	-3.99	5.56e-69	gi|350646799|emb|CCD58520.1| camp-dependent protein kinase regulatory chain,putative [Schistosoma mansoni]
	Treg_005362	1835	1026	1343	2086	346	447	424	343	-3.98	1.95e-77	gi|256070677|ref|XP_002571669.1| hypothetical protein [Schistosoma mansoni]
	Treg_003817	403.6	328.2	258.3	550.6	52	75.2	97.2	88.2	-3.98	6.68e-54	gi|353233376|emb|CCD80731.1| putative glutaminase [Schistosoma mansoni]
	Treg_017134	2109	2048	1650	2798	400	410	427	371	-3.98	1e-63	gi|353228593|emb|CCD74764.1| hypothetical protein Smp_124220 [Schistosoma mansoni]
	Treg_004276	149.7	93.3	91.4	103.3	8.3	11.2	11.1	11	-3.98	9.4e-61	gi|256084326|ref|XP_002578381.1| hypothetical protein [Schistosoma mansoni]gi|350644711|emb|CCD60589.1| hypothetical protein Smp_161240 [Schistosoma mansoni]
	Treg_001238	332	422	247	382	68	104	94	83	-3.98	4.4e-44	gi|256080714|ref|XP_002576623.1| pol-related [Schistosoma mansoni]gi|350645573|emb|CCD59698.1| pol-related [Schistosoma mansoni]
	Treg_000534	1247.9	1587	920	1692.9	457.7	445.4	419.1	367.3	-3.98	2.91e-50	gi|256071973|ref|XP_002572312.1| adenosine kinase [Schistosoma mansoni]gi|353229792|emb|CCD75963.1| putative adenosine kinase [Schistosoma mansoni]
	Treg_002543	202	189	205	260	11	20	22	28	-3.97	2.35e-52	gi|56753712|gb|AAW25053.1| SJCHGC05709 protein [Schistosoma japonicum]
	Treg_001402	165	146	158	283	12	14	25	21	-3.96	6.19e-51	gi|256052844|ref|XP_002569959.1| hypothetical protein [Schistosoma mansoni]gi|353228496|emb|CCD74667.1| hypothetical protein Smp_092150 [Schistosoma mansoni]
	Treg_008845	1117	977	806	1325	269	354	366	299	-3.96	6.77e-74	gi|256085170|ref|XP_002578796.1| propionyl-CoA carboxylase beta chain mitochondrial precursor [Schistosoma mansoni]gi|353228544|emb|CCD74715.1| putative propionyl-CoA carboxylase beta chain,mitochondrial precursor [Schistosoma mansoni]
	Treg_014837	1277.3	1364.5	975.3	1474.1	106.5	104.7	108.8	71.5	-3.96	4.04e-49	gi|256052724|ref|XP_002569903.1| hypothetical protein [Schistosoma mansoni]
	Treg_005122	15	18	13	19	1	5	4	8	-3.96	8.67e-17	gi|226468080|emb|CAX76267.1| putative Retinol dehydrogenase 11 [Schistosoma japonicum]
	Treg_000121	2722.4	1194.3	1869	2541.3	362.9	499.7	628.7	479.5	-3.95	2.79e-65	gi|256082915|ref|XP_002577697.1| hypothetical protein [Schistosoma mansoni]gi|353232773|emb|CCD80129.1| hypothetical protein Smp_156910.2 [Schistosoma mansoni]
	Treg_009012	1555	1836	1091	2004	328	368	471	330	-3.95	1.15e-49	gi|56682906|gb|AAW21808.1| hypoxanthine-guanine phosphoribosyltranferase [Schistosoma japonicum]gi|56759064|gb|AAW27672.1| SJCHGC02257 protein [Schistosoma japonicum]gi|226469132|emb|CAX70045.1| hypoxanthine phosphoribosyltransferase 1 [Schistosoma japonicum]gi|226469134|emb|CAX70046.1| hypoxanthine phosphoribosyltransferase 1 [Schistosoma japonicum]
	Treg_001212	170	118	98	172	26	45	34	27	-3.95	5.04e-57	gi|353228473|emb|CCD74644.1| putative cyclins [Schistosoma mansoni]
	Treg_000703	100.1	68	66.9	94	6.5	4.7	8.7	11.1	-3.95	2.54e-52	gi|256082881|ref|XP_002577680.1| hypothetical protein [Schistosoma mansoni]
	Treg_010501	29	34.4	22.1	45.1	7.2	11.9	9.7	6.9	-3.95	1.65e-24	gi|256071908|ref|XP_002572280.1| hypothetical protein [Schistosoma mansoni]gi|353233727|emb|CCD81081.1| hypothetical protein Smp_126470 [Schistosoma mansoni]
	Treg_000630	3450.7	2206	2423.9	3909.3	945.1	1156.8	1049.3	1074.5	-3.95	1.16e-66	gi|226486738|emb|CAX74446.1| Protein FAM62B [Schistosoma japonicum]
	Treg_011226	503	239	379	416	43	35	19	28	-3.94	3.17e-54	NO HIT
	Treg_007133	2110	2451	1481	3165	344	407	409	382	-3.94	1.61e-52	gi|56752969|gb|AAW24696.1| SJCHGC09431 protein [Schistosoma japonicum]
	Treg_003146	45	24	24	46	4	6	9	10	-3.94	6.32e-20	gi|256089064|ref|XP_002580637.1| soluble guanylate cyclase gcy [Schistosoma mansoni]gi|350646772|emb|CCD58493.1| soluble guanylate cyclase gcy, putative [Schistosoma mansoni]
	Treg_000574	8637	3249	4554	7350	1270	1251	1588	1334	-3.92	1.25e-60	gi|256070216|ref|XP_002571439.1| hypothetical protein [Schistosoma mansoni]gi|353230356|emb|CCD76527.1| hypothetical protein Smp_121950 [Schistosoma mansoni]
	Treg_000632	1147	657	922	1228	171	168	198	160	-3.92	8.44e-72	gi|256080858|ref|XP_002576693.1| cationic amino acid transporter [Schistosoma mansoni]gi|353232568|emb|CCD79923.1| putative cationic amino acid transporter [Schistosoma mansoni]
	Treg_000874	138.7	100.1	143.7	130.2	6.9	15.3	14	16.3	-3.92	5.32e-55	gi|358334947|dbj|GAA29577.2| elongation of very long chain fatty acids protein 7 [Clonorchis sinensis]
	Treg_004715	256.6	275.6	217.6	246.8	54.8	134.1	76.6	77.7	-3.92	3.02e-41	gi|256077875|ref|XP_002575225.1| mitochondrial import inner membrane translocase subunit tim22 [Schistosoma mansoni]gi|353231789|emb|CCD79144.1| putative mitochondrial import inner membrane translocase subunit tim22 [Schistosoma mansoni]
	Treg_003710	4103.6	1456	2862.2	3612.9	209.1	267.8	230.3	245.7	-3.91	7.93e-64	NO HIT
	Treg_001764	6.1	3.8	7.3	8.8	1.1	1.3	0	0	-3.91	2.77e-12	gi|353233009|emb|CCD80364.1| hypothetical protein Smp_123240 [Schistosoma mansoni]
	Treg_004098	655.5	429	483	753	113	129.8	128.8	142.9	-3.89	1.57e-70	gi|256071075|ref|XP_002571867.1| hypothetical protein [Schistosoma mansoni]gi|353228572|emb|CCD74743.1| hypothetical protein Smp_124340 [Schistosoma mansoni]
	Treg_000284	51.1	39.7	24.3	58.3	13.4	9.8	0	10.9	-3.88	1.11e-15	gi|226471638|emb|CAX70900.1| hypothetical protein [Schistosoma japonicum]
	Treg_008475	4135.6	3856.9	2875	6178.6	302	370.1	372	359.6	-3.88	3.85e-62	gi|256084214|ref|XP_002578326.1| adenylate kinase [Schistosoma mansoni]gi|353229153|emb|CCD75324.1| putative adenylate kinase [Schistosoma mansoni]
	Treg_002478	65	64	58	75	3	11	10	6	-3.88	5.4e-39	gi|256071894|ref|XP_002572273.1| hypothetical protein [Schistosoma mansoni]gi|353230463|emb|CCD76634.1| hypothetical protein Smp_126430 [Schistosoma mansoni]
	Treg_000567	655	694	492	690	193	223	225	195	-3.87	7.79e-62	gi|256075141|ref|XP_002573879.1| Arginine N-methyltransferase 2 [Schistosoma mansoni]gi|360044977|emb|CCD82525.1| putative arginine N-methyltransferase 2 [Schistosoma mansoni]
	Treg_002033	121	60	97	110	23	33	20	15	-3.86	5.61e-41	gi|76153633|gb|AAX25247.2| SJCHGC07204 protein [Schistosoma japonicum]
	Treg_000306	1687	1687	1219	2272	529	607	671	545	-3.86	1.05e-66	gi|353230869|emb|CCD77286.1| unnamed protein product [Schistosoma mansoni]
	Treg_000470	1589	1313	978	1984	414	427	447	409	-3.86	4.25e-51	gi|226482302|emb|CAX73750.1| Calpain-B [Schistosoma japonicum]
	Treg_006704	12188	11153	8516	14613	4064	5463	4858	4245	-3.84	1.22e-34	gi|256071353|ref|XP_002572005.1| calcium-binding protein [Schistosoma mansoni]gi|350645147|emb|CCD60155.1| calcium-binding protein, putative [Schistosoma mansoni]
	Treg_001164	292	322	215	363	80	103	100	81	-3.84	7.23e-48	gi|556520320|emb|CDJ23598.1| H2A histone family member Y [Echinococcus granulosus]
	Treg_002683	18	23	21	29	6	1	1	3	-3.83	2.46e-16	gi|226480040|emb|CAX73316.1| Golgi-associated plant pathogenesis-related protein 1 [Schistosoma japonicum]
	Treg_002289	132	140	112	184	11	20	18	15	-3.82	8.62e-55	NO HIT
	Treg_000172	204.9	155.6	139.1	225.5	18.3	11.7	22.4	23.3	-3.82	8.48e-51	gi|256081607|ref|XP_002577060.1| hypothetical protein [Schistosoma mansoni]gi|360043651|emb|CCD81197.1| hypothetical protein Smp_057710 [Schistosoma mansoni]
	Treg_012708	78	59	59	110	19	26	16	19	-3.82	2.28e-31	gi|256076863|ref|XP_002574728.1| pou6f1/brn-5 [Schistosoma mansoni]gi|360044070|emb|CCD81617.1| putative pou6f1/brn-5 [Schistosoma mansoni]
	Treg_017672	694.2	274.6	433	736.2	98.8	112.1	108.6	107.5	-3.82	1.81e-56	gi|256075762|ref|XP_002574185.1| ef hand domain family member A2 [Schistosoma mansoni]
	Treg_000017	26.8	8.1	20.3	27.4	1.1	3.2	0	4.1	-3.81	1.76e-14	gi|76155389|gb|AAX26671.2| SJCHGC04932 protein [Schistosoma japonicum]
	Treg_005681	2468	2078.1	1814.3	3232.7	187	229.4	263.8	209.6	-3.81	5.45e-67	gi|358336203|dbj|GAA31628.2| cysteine and glycine-rich protein [Clonorchis sinensis]
	Treg_000379	6536	5461	4050	7429	779	923	1009	862	-3.81	5.05e-60	gi|256080630|ref|XP_002576582.1| glucose-6-phosphate 1-dehydrogenase [Schistosoma mansoni]
	Treg_002052	186	117	129	245	36	45	37	45	-3.81	1.03e-48	gi|256077240|ref|XP_002574915.1| innexin [Schistosoma mansoni]gi|353229048|emb|CCD75219.1| putative innexin [Schistosoma mansoni]
	Treg_000857	1092	624.3	866.2	1117.1	72	88	71	66	-3.8	6.69e-72	NO HIT
	Treg_003651	268.2	144.8	182.3	173	34.5	47.7	66.8	72.7	-3.8	4.44e-39	gi|76154755|gb|AAX26177.2| SJCHGC09515 protein [Schistosoma japonicum]
	Treg_004038	906.7	537	639.7	965.5	275.5	425.9	322	285.8	-3.79	3.21e-57	gi|256081124|ref|XP_002576823.1| hypothetical protein [Schistosoma mansoni]
	Treg_004668	54	11	50	53	8	17	9	7	-3.78	1.3e-12	NO HIT
	Treg_008265	184.5	266	174.3	291.7	55.8	60.7	48.1	55.1	-3.78	1.1e-41	gi|256086907|ref|XP_002579625.1| diacylglycerol pyrophosphate (phosphatidic acid) phosphatase 1 [Schistosoma mansoni]gi|360043766|emb|CCD81312.1| diacylglycerol pyrophosphate (phosphatidic acid) phosphatase 1 [Schistosoma mansoni]
	Treg_001790	288.5	503.1	286	418.3	87.1	129.4	85.1	70.5	-3.78	4.45e-30	gi|353232004|emb|CCD79359.1| unnamed protein product [Schistosoma mansoni]
	Treg_001623	740	744	609	954	210	300	256	195	-3.77	2.18e-52	gi|256075701|ref|XP_002574155.1| hypothetical protein [Schistosoma mansoni]gi|353232440|emb|CCD79795.1| hypothetical protein Smp_136860 [Schistosoma mansoni]
	Treg_010004	345	428	321	466	130	132	208	149	-3.77	2.22e-41	gi|256090258|ref|XP_002581120.1| alpha tubulin [Schistosoma mansoni]gi|7579904|gb|AAB21180.2| alpha-tubulin [Schistosoma mansoni]gi|353232587|emb|CCD79942.1| putative alpha tubulin [Schistosoma mansoni]
	Treg_000109	2820.4	1759.4	1641.5	3543.6	210.6	247.1	195.2	207.7	-3.77	3.75e-57	gi|256088994|ref|XP_002580604.1| hypothetical protein [Schistosoma mansoni]gi|353231359|emb|CCD77777.1| hypothetical protein Smp_097180 [Schistosoma mansoni]
	Treg_001017	2191	2512	1764	2551	212	247	275	168	-3.76	1.32e-45	gi|256085858|ref|XP_002579128.1| lipid-binding protein [Schistosoma mansoni]gi|353232263|emb|CCD79618.1| putative lipid-binding protein [Schistosoma mansoni]
	Treg_005106	144	72	141	139	25	40	26	28	-3.76	1.32e-42	gi|350644745|emb|CCD60540.1| hypothetical protein Smp_153120 [Schistosoma mansoni]
	Treg_011140	437	627	379	542	130	90	133	87	-3.76	3.73e-30	gi|29840901|gb|AAP05902.1| similar to NM_007646 lymphocyte differentiation antigen CD38 homolog in Mus musculus [Schistosoma japonicum]
	Treg_000111	929.7	183.8	575.7	929.1	35.4	65	59.7	56.3	-3.76	1.4e-36	gi|256088994|ref|XP_002580604.1| hypothetical protein [Schistosoma mansoni]gi|353231359|emb|CCD77777.1| hypothetical protein Smp_097180 [Schistosoma mansoni]
	Treg_004708	17	13	23	17	5	7	3	6	-3.75	8.8e-14	NO HIT
	Treg_016331	121.7	107.1	64.8	167.2	17.6	41.1	35.3	22.8	-3.75	1.95e-28	NO HIT
	Treg_000128	16138.5	14168.1	10597.9	16833.7	2625.2	3046.4	2895.1	2429.4	-3.74	2.3e-57	gi|29841466|gb|AAP06498.1| similar to GenBank Accession Number Z29075 myophilin antigen in Echinococcus granulosus [Schistosoma japonicum]gi|48596229|gb|AAT46028.1| myophilin-like protein [Echinococcus granulosus]gi|226467099|emb|CAX76030.1| Myophilin [Schistosoma japonicum]
	Treg_002288	241	85	187	234	48	92	28	46	-3.74	6.18e-27	gi|353230228|emb|CCD76399.1| hypothetical protein Smp_156480 [Schistosoma mansoni]
	Treg_015897	5498.5	3298.1	3493	5200.1	1057	1245.2	1166.1	1016.3	-3.74	2.24e-68	gi|226479208|emb|CAX73099.1| Four and a half LIM domains protein 2 [Schistosoma japonicum]
	Treg_000728	302	160	130	284	58	76	53	56	-3.73	3.97e-36	gi|56754319|gb|AAW25347.1| SJCHGC01937 protein [Schistosoma japonicum]
	Treg_017884	224.5	262	221.9	301.1	101.1	100.3	96.9	79	-3.73	1.32e-51	gi|256071484|ref|XP_002572070.1| hypothetical protein [Schistosoma mansoni]gi|353229698|emb|CCD75869.1| hypothetical protein Smp_005960 [Schistosoma mansoni]
	Treg_000331	1261.9	323.3	1825.8	1210.2	318.7	539.7	191.2	287.5	-3.72	1.19e-17	gi|256076346|ref|XP_002574474.1| endoplasmin [Schistosoma mansoni]
	Treg_001062	2400	1913	1648	3118	509	512	500	483	-3.72	4.35e-62	gi|56754106|gb|AAW25242.1| SJCHGC06729 protein [Schistosoma japonicum]
	Treg_006516	799	927	634	1246	363	363	458	376	-3.72	2.74e-44	gi|29841247|gb|AAP06279.1| SJCHGC00728 protein [Schistosoma japonicum]gi|257206028|emb|CAX82665.1| pleckstrin homology domain containing family B [Schistosoma japonicum]gi|257206614|emb|CAX82935.1| Pleckstrin homology domain-containing family B [Schistosoma japonicum]
	Treg_010395	2474	1025	1582	2276	374	396	380	386	-3.71	1.28e-58	gi|256075723|ref|XP_002574166.1| hypothetical protein [Schistosoma mansoni]gi|353232429|emb|CCD79784.1| hypothetical protein Smp_136930 [Schistosoma mansoni]
	Treg_001363	293	347	233	411	94	141	103	84	-3.7	4.06e-40	gi|56757974|gb|AAW27127.1| SJCHGC05495 protein [Schistosoma japonicum]
	Treg_004321	392.9	112	380	260	59	77.6	55	73	-3.7	3.61e-33	NO HIT
	Treg_003663	20	40	24	15	5	13	12	6	-3.69	6.95e-12	gi|169146620|emb|CAP72048.1| tubulin alpha-5 [Fasciola hepatica]
	Treg_003306	16.8	11.7	15.1	21.5	5.8	7.9	5.2	3.5	-3.69	3.13e-14	gi|256081635|ref|XP_002577074.1| hypothetical protein [Schistosoma mansoni]gi|360043665|emb|CCD81211.1| hypothetical protein Smp_057860 [Schistosoma mansoni]
	Treg_016104	630	779	396	830	257	333	353	266	-3.68	5.11e-34	gi|56753760|gb|AAW25077.1| SJCHGC09036 protein [Schistosoma japonicum]
	Treg_000060	4005	4633	2754	4470	749	951	984	801	-3.66	1.31e-36	gi|256076791|ref|XP_002574693.1| lysosome-associated membrane glycoprotein [Schistosoma mansoni]gi|360045316|emb|CCD82864.1| putative lysosome-associated membrane glycoprotein [Schistosoma mansoni]
	Treg_004267	93	61.1	49.4	136.8	11.4	26.8	22.7	8	-3.66	2.48e-21	gi|350646738|emb|CCD58652.1| serine/threonine protein phosphatase 2a regulatory subunit A, putative [Schistosoma mansoni]
	Treg_000411	140.6	131.8	131.4	208.3	21.7	41.7	54.8	50.3	-3.66	2.57e-40	gi|226482484|emb|CAX73841.1| 1-aminocyclopropane-1-carboxylate synthase/ alanine transaminase/ transferase, transferring nitrogenous groups [Schistosoma japonicum]
	Treg_000304	762.2	1067	644.6	946.6	282.3	400.3	363.5	307.1	-3.65	3.11e-38	gi|226471722|emb|CAX70942.1| putative ring finger protein 141 [Schistosoma japonicum]
	Treg_000628	654	792	503	762	259	270	287	214	-3.64	2.01e-46	gi|256084526|ref|XP_002578479.1| rRNA processing protein (Rrp20) [Schistosoma mansoni]gi|353229235|emb|CCD75406.1| putative rrna processing protein (Rrp20) [Schistosoma mansoni]
	Treg_004092	42.9	24.3	28.1	35.5	0	11.1	19.9	4	-3.64	1.2e-12	gi|358335349|dbj|GAA53885.1| hypothetical protein CLF_111525 [Clonorchis sinensis]
	Treg_004692	51.4	40.5	37	48.9	12.8	13.4	18	12.1	-3.64	6.89e-30	gi|256077074|ref|XP_002574833.1| hypothetical protein [Schistosoma mansoni]gi|350646482|emb|CCD58881.1| hypothetical protein Smp_140460 [Schistosoma mansoni]
	Treg_003604	169.6	92.4	172.4	168.6	27.8	64.2	66	31.6	-3.64	4.41e-33	gi|256052744|ref|XP_002569912.1| crp1/csrp1/crip1 [Schistosoma mansoni]gi|353232209|emb|CCD79564.1| putative crp1/csrp1/crip1 [Schistosoma mansoni]
	Treg_000953	2277	1690	1601	2996	761	860	730	693	-3.63	4e-63	gi|226469080|emb|CAX70019.1| Myosin binding subunit [Schistosoma japonicum]
	Treg_007297	1264	1094	945	1851	304	425	420	308	-3.63	2.57e-56	gi|56757563|gb|AAW26944.1| SJCHGC06585 protein [Schistosoma japonicum]gi|226479120|emb|CAX73055.1| Protein tyrosine phosphatase type IVA protein 3 [Schistosoma japonicum]
	Treg_004304	243	205	177	297	65	94	94	52	-3.62	9.24e-52	gi|256079803|ref|XP_002576174.1| hypothetical protein [Schistosoma mansoni]gi|360044262|emb|CCD81809.1| hypothetical protein Smp_148180 [Schistosoma mansoni]
	Treg_005368	8856.6	4587.4	38048.2	11001	8845.6	10086.9	14332.4	13075.2	-3.62	2.25e-06	NO HIT
	Treg_001312	63	62	60	71	13	28	29	15	-3.62	2e-30	gi|56759100|gb|AAW27690.1| SJCHGC04924 protein [Schistosoma japonicum]
	Treg_003812	307.7	186.6	204.3	206.5	27.4	29.9	20.7	27.1	-3.62	3.6e-58	gi|353229303|emb|CCD75474.1| protein kinase [Schistosoma mansoni]
	Treg_001268	182	110	106	176	16	17	17	25	-3.61	2.58e-56	gi|524869989|ref|XP_005091781.1| PREDICTED: zinc finger protein 474-like [Aplysia californica]
	Treg_000117	1275.1	1216.6	921.3	1447.7	460.3	463.8	481.5	418.2	-3.61	2.6e-49	gi|29841117|gb|AAP06130.1| hypothetical protein with A20-like zinc finger [Schistosoma japonicum]
	Treg_000151	3130	4822	1890	4053	942	1121	1361	890	-3.61	6.59e-38	gi|226472950|emb|CAX71161.1| Cytochrome C Oxidase [Schistosoma japonicum]
	Treg_007541	1447	2120	1104	2298	695	790	808	624	-3.6	5.23e-34	gi|226482320|emb|CAX73759.1| NADH dehydrogenase (ubiquinone) Fe-S protein 2 [Schistosoma japonicum]
	Treg_006468	1122	896	838	1254	274	229	263	228	-3.6	3.43e-52	gi|350644490|emb|CCD60780.1| hypothetical protein Smp_140130 [Schistosoma mansoni]
	Treg_002098	181	95	118	197	40	57	45	46	-3.6	1.11e-45	gi|256086598|ref|XP_002579484.1| peptidase [Schistosoma mansoni]gi|350646313|emb|CCD59039.1| Mername-AA213 putative peptidase (M14 family) [Schistosoma mansoni]
	Treg_004171	1702	1016	915	1787	277	327	325	287	-3.6	2.44e-56	gi|226477870|emb|CAX72642.1| hypothetical protein [Schistosoma japonicum]
	Treg_004775	26	20	19	31	2	5	2	4	-3.59	1.5e-25	gi|56756817|gb|AAW26580.1| SJCHGC05755 protein [Schistosoma japonicum]
	Treg_011429	624	450	474	763	49.9	62	58	60	-3.59	1.29e-62	gi|256085856|ref|XP_002579127.1| retinaldehyde binding protein-related [Schistosoma mansoni]
	Treg_000004	804	1049	562	1007	314	397	394	291	-3.58	1.54e-34	gi|29840902|gb|AAP05903.1| SJCHGC00581 protein [Schistosoma japonicum]gi|226468514|emb|CAX69934.1| putative translocase of the inner mitochondrial membrane 14 isoform d [Schistosoma japonicum]
	Treg_001595	57.2	6.1	64.8	60	6.4	27.4	10.6	15.6	-3.57	5.91e-09	NO HIT
	Treg_000413	321.5	241.6	301.4	420.4	71.4	75.2	99.3	90.4	-3.57	1.31e-58	gi|226482484|emb|CAX73841.1| 1-aminocyclopropane-1-carboxylate synthase/ alanine transaminase/ transferase, transferring nitrogenous groups [Schistosoma japonicum]
	Treg_004185	80.6	26.8	69.8	77.1	10.8	20.5	18.3	20.6	-3.56	9.73e-23	NO HIT
	Treg_016670	67	93.1	42.3	50	19.9	27.8	20.1	19.6	-3.56	1.5e-19	gi|226487284|emb|CAX75507.1| Leukocyte receptor cluster member 9 [Schistosoma japonicum]gi|226487286|emb|CAX75508.1| Leukocyte receptor cluster member 9 [Schistosoma japonicum]
	Treg_019309	397	457	190	488	86	81	122	109	-3.56	1.04e-27	gi|226480844|emb|CAX73519.1| Methionine aminopeptidase 1 [Schistosoma japonicum]
	Treg_000091	2600	1686	1909	2639	827	389	520	396	-3.56	1.41e-30	gi|256090681|ref|XP_002581311.1| glucose transport protein [Schistosoma mansoni]gi|353231051|emb|CCD77469.1| putative glucose transport protein [Schistosoma mansoni]
	Treg_000349	192.9	104.9	124.4	163.9	29.9	43.1	44.4	31.6	-3.55	4.11e-36	NO HIT
	Treg_000504	48.4	36	40.5	58.6	8.1	21.1	11.1	11.5	-3.55	4.92e-22	gi|56757918|gb|AAW27099.1| SJCHGC06797 protein [Schistosoma japonicum]
	Treg_003653	58.2	42	56.6	74.4	14.4	14.5	24.6	21	-3.55	8.51e-34	gi|56753585|gb|AAW24995.1| SJCHGC01427 protein [Schistosoma japonicum]
	Treg_000521	396	243	263	343	32	38	37	43	-3.55	1.13e-62	gi|256052265|ref|XP_002569695.1| hypothetical protein [Schistosoma mansoni]gi|353229739|emb|CCD75910.1| hypothetical protein Smp_156760 [Schistosoma mansoni]
	Treg_000826	1139	655	799	1320	301	453	408	380	-3.54	3.45e-57	gi|360045474|emb|CCD83022.1| related to multifunctional cyclin-dependent kinase-related [Schistosoma mansoni]
	Treg_001617	616	564	426	761	169	219	171	200	-3.54	1.06e-42	gi|76162971|gb|AAX30713.2| SJCHGC07123 protein [Schistosoma japonicum]
	Treg_002087	133.2	81.2	81.4	86.1	23.3	22.2	38.6	6.4	-3.54	1.64e-20	gi|56755489|gb|AAW25923.1| SJCHGC07939 protein [Schistosoma japonicum]
	Treg_000457	3112	2884	2127	3930	872	1049	1057	864	-3.53	1.36e-43	gi|256088756|ref|XP_002580491.1| adenosylhomocysteinase [Schistosoma mansoni]
	Treg_003683	821	739	553	997	65	74	101	84	-3.53	6.88e-45	gi|256070858|ref|XP_002571759.1| hypothetical protein [Schistosoma mansoni]gi|353232984|emb|CCD80339.1| hypothetical protein Smp_002920.1 [Schistosoma mansoni]
	Treg_008983	307.4	348.9	244.1	383.4	136.9	163.5	135.5	147.5	-3.52	3.06e-42	gi|558230546|ref|XP_006138989.1| PREDICTED: calcium uptake protein 2, mitochondrial [Pelodiscus sinensis]
	Treg_004181	121.2	32.3	155.6	85.5	13.2	18.2	13.9	8.8	-3.51	1.69e-23	NO HIT
	Treg_004268	27.7	21.8	37.6	43.8	16.4	8.8	11.4	8.6	-3.51	1.15e-18	gi|256075537|ref|XP_002574075.1| arsenite inducuble rna associated protein aip-1 [Schistosoma mansoni]gi|360043072|emb|CCD78484.1| putative arsenite inducuble rna associated protein aip-1 [Schistosoma mansoni]
	Treg_010558	376.7	68.8	249	274.5	71.1	51	70.8	58.1	-3.51	4.51e-23	gi|353230445|emb|CCD76616.1| putative nucleolar protein c7b [Schistosoma mansoni]
	Treg_000399	1082	1055	789	1644	268	318	326	277	-3.51	1.84e-45	gi|256072363|ref|XP_002572505.1| hypothetical protein [Schistosoma mansoni]
	Treg_003677	3176	3486	2357	4337	337	468	432	358	-3.5	2.81e-46	gi|226484834|emb|CAX74326.1| hypothetical protein [Schistosoma japonicum]
	Treg_000252	13252.8	7440	9549.9	17701.1	2233.7	2817.6	2425.8	2452.4	-3.5	2.48e-45	gi|3859490|gb|AAC72756.1| calcium ATPase 2 [Schistosoma mansoni]
	Treg_000342	2305	1354	1494	2610	524	714	600	592	-3.5	3.6e-58	gi|256093004|ref|XP_002582167.1| pyruvate carboxylase [Schistosoma mansoni]gi|353228799|emb|CCD74970.1| putative pyruvate carboxylase [Schistosoma mansoni]
	Treg_001103	223	176	168	256	81	89	96	84	-3.49	4.35e-60	gi|256070872|ref|XP_002571766.1| sodium/solute symporter [Schistosoma mansoni]gi|353232131|emb|CCD79486.1| putative sodium/solute symporter [Schistosoma mansoni]
	Treg_000378	1524	1560	996	1979	359	414	409	373	-3.48	5.43e-42	NO HIT
	Treg_008157	1021.3	245.1	3998.9	2224	13.7	884.8	659.8	838.8	-3.48	0.000145	gi|350854945|emb|CAZ30725.2| hypothetical protein Smp_138620 [Schistosoma mansoni]
	Treg_012877	152.3	108.9	124.4	129.8	16.1	26.8	14	15.8	-3.48	1.15e-51	gi|358334947|dbj|GAA29577.2| elongation of very long chain fatty acids protein 7 [Clonorchis sinensis]
	Treg_018932	125	117	99	112	35	59	35	32	-3.48	3.9e-32	gi|256078701|ref|XP_002575633.1| hypothetical protein [Schistosoma mansoni]gi|353231990|emb|CCD79345.1| hypothetical protein Smp_145360.1 [Schistosoma mansoni]
	Treg_013306	295	197	207	283	59	96	72	55	-3.47	1.86e-59	gi|256087540|ref|XP_002579925.1| zinc finger protein [Schistosoma mansoni]gi|353230325|emb|CCD76496.1| putative zinc finger protein [Schistosoma mansoni]
	Treg_003199	7	4	5	12	1	1	1	1	-3.47	1.3e-13	gi|256076710|ref|XP_002574653.1| hypothetical protein [Schistosoma mansoni]gi|350645293|emb|CCD60008.1| hypothetical protein Smp_139560 [Schistosoma mansoni]
	Treg_015434	1077.1	740.1	769.5	1058	422.5	530	426.2	408.7	-3.45	3.65e-60	gi|360044259|emb|CCD81806.1| putative nucleolar protein NOP56 [Schistosoma mansoni]
	Treg_017300	1201	1373	936	1791	476	639	657	570	-3.45	5.37e-47	gi|56753645|gb|AAW25025.1| SJCHGC05861 protein [Schistosoma japonicum]
	Treg_003988	70	46	49	77	9	6	9	11	-3.45	2.14e-41	gi|358332543|dbj|GAA30538.2| kinesin-1 [Clonorchis sinensis]
	Treg_004301	107.7	40.6	60.2	102.8	40.9	1.6	29.3	29.2	-3.44	1.99e-11	gi|353231881|emb|CCD79236.1| hypothetical protein Smp_126840 [Schistosoma mansoni]
	Treg_000946	30.2	18	35.2	27	1.9	5.5	3.7	5.7	-3.44	1.43e-20	gi|353229434|emb|CCD75605.1| hypothetical protein Smp_173630 [Schistosoma mansoni]
	Treg_005355	829.8	445.4	460	1049.8	79.2	73.9	60.4	77.5	-3.44	1.33e-47	gi|256075762|ref|XP_002574185.1| ef hand domain family member A2 [Schistosoma mansoni]
	Treg_000660	18.1	4.1	56.3	15.9	8.9	11.6	0	6.4	-3.43	1.64e-05	NO HIT
	Treg_015392	7917	7052	4809	8338	2454	2381	3345	2444	-3.43	2.42e-49	gi|56753293|gb|AAW24850.1| SJCHGC02876 protein [Schistosoma japonicum]gi|226471522|emb|CAX70842.1| Aquaporin-9 (AQP-9) (Small solute channel 1) [Schistosoma japonicum]gi|226471524|emb|CAX70843.1| Aquaporin-9 (AQP-9) (Small solute channel 1) [Schistosoma japonicum]gi|226471526|emb|CAX70844.1| Aquaporin-9 (AQP-9) (Small solute channel 1) [Schistosoma japonicum]
	Treg_003656	536.4	101.3	705.6	354	134.5	123.5	135.1	237.5	-3.43	6.29e-13	gi|353233110|emb|CCD80465.1| putative transient receptor potential cation channel [Schistosoma mansoni]
	Treg_000635	16.7	8.2	47.4	31.6	0	0	18.5	19.9	-3.43	6.09e-06	gi|256087849|ref|XP_002580075.1| hypothetical protein [Schistosoma mansoni]gi|360043718|emb|CCD81264.1| hypothetical protein Smp_171600 [Schistosoma mansoni]
	Treg_004259	38.3	32.1	48.1	41.8	17	12.1	7.7	13.9	-3.43	4.37e-17	gi|256078929|ref|XP_002575745.1| sodium/dicarboxylate symporter-related [Schistosoma mansoni]gi|360042935|emb|CCD78345.1| sodium/dicarboxylate symporter-related [Schistosoma mansoni]
	Treg_008316	1041	1047	756	1176	300	423	399	315	-3.42	2.24e-54	gi|256053167|ref|XP_002570075.1| hypothetical protein [Schistosoma mansoni]gi|350644859|emb|CCD60422.1| hypothetical protein Smp_094920 [Schistosoma mansoni]
	Treg_012055	28.3	20.2	16.3	39.2	4.2	16.9	5.2	3.7	-3.42	6.77e-13	gi|56756765|gb|AAW26554.1| SJCHGC01037 protein [Schistosoma japonicum]
	Treg_004526	99	83	87	132	29	40	33	30	-3.42	1.28e-34	gi|56754929|gb|AAW25647.1| SJCHGC08378 protein [Schistosoma japonicum]
	Treg_000570	2505	2423.4	1799.1	2622.1	806.1	957.7	967.4	826.8	-3.42	3.88e-37	gi|56754281|gb|AAW25328.1| SJCHGC09367 protein [Schistosoma japonicum]
	Treg_001088	2498	2856	1725	3582	874	1103	1069	913	-3.42	7.76e-30	gi|256090488|ref|XP_002581220.1| dihydrolipoamide succinyltransferase component of 2-oxoglutarate dehydrogenase [Schistosoma mansoni]
	Treg_002416	41.9	5.1	48.2	20.3	14.4	10.4	4.6	15	-3.42	2.14e-07	gi|256083517|ref|XP_002577989.1| transmembrane protein 1/tmem1b [Schistosoma mansoni]
	Treg_003903	2190	2513.8	1445.8	2615.2	514	566.9	616	454	-3.4	2.34e-39	gi|226468700|emb|CAX76378.1| 16 kDa calcium-binding protein (Egg antigen SME16) [Schistosoma japonicum]
	Treg_008658	443.4	97.3	842.2	466.9	244.4	278.1	122.4	283	-3.4	1.28e-09	gi|353233200|emb|CCD80555.1| hypothetical protein Smp_036760 [Schistosoma mansoni]
	Treg_015907	1379	1410	1040	1824	331	395	384	360	-3.4	6.47e-51	gi|353230696|emb|CCD77113.1| hypothetical protein Smp_037640 [Schistosoma mansoni]
	Treg_014976	3161	2064	2158	3586	558	750	721	616	-3.4	7.1e-58	gi|256074714|ref|XP_002573668.1| pdz and lim domain protein [Schistosoma mansoni]gi|360043738|emb|CCD81284.1| putative pdz and lim domain protein [Schistosoma mansoni]
	Treg_002327	54.1	75.1	55.6	91.3	21	24.9	22.2	26.7	-3.39	9.61e-23	gi|29841044|gb|AAP06057.1| similar to GenBank Accession Number BC009717 hypothetical protein in Homo sapiens; hypothetical protein in Homo sapiens [Schistosoma japonicum]
	Treg_004778	34	28	29	40	4.1	0	3	2	-3.39	3.58e-14	NO HIT
	Treg_016409	139.9	143.2	111.4	158.6	30.4	48.8	53.6	36.4	-3.39	7.86e-41	NO HIT
	Treg_001145	124	101	103	148	37	12	10	14	-3.39	8.19e-20	gi|60696964|gb|AAX30874.1| SJCHGC08408 protein [Schistosoma japonicum]
	Treg_003712	103.1	56.6	103.8	122.6	22.3	22.7	28.2	49.5	-3.38	2.84e-25	NO HIT
	Treg_003709	2035.3	811.9	1812.6	2092.6	195.2	220.6	192.9	208.3	-3.38	1.3e-46	gi|353229246|emb|CCD75417.1| hypothetical protein Smp_161790.1 [Schistosoma mansoni]
	Treg_001603	678	538	563	738	221	314	282	240	-3.38	1.52e-58	gi|256080161|ref|XP_002576351.1| hypothetical protein [Schistosoma mansoni]gi|353232402|emb|CCD79757.1| hypothetical protein Smp_050470 [Schistosoma mansoni]
	Treg_000426	1933.1	1899.3	1371.1	2077	577.6	701.8	606.4	525.4	-3.38	9.16e-42	gi|256071134|ref|XP_002571896.1| hypothetical protein [Schistosoma mansoni]gi|350645645|emb|CCD59620.1| hypothetical protein Smp_004360.1 [Schistosoma mansoni]
	Treg_000046	74.7	33.5	67.6	59.5	20.8	21.2	20.4	17.6	-3.37	2.07e-20	NO HIT
	Treg_017018	352	211	248	385	103	119	107	83	-3.37	2.2e-55	gi|56754525|gb|AAW25450.1| SJCHGC07511 protein [Schistosoma japonicum]
	Treg_000099	3933.8	4019.1	2989.1	4538.9	1222.8	1431.6	1656.2	1340.4	-3.37	9.33e-29	gi|226467644|emb|CAX69698.1| Zinc finger, RING-type,domain-containing protein [Schistosoma japonicum]
	Treg_000326	2680	2599	2247	2963	1236	1499	1550	1157	-3.36	2.17e-39	gi|226472672|emb|CAX71022.1| chloride intracellular channel 4 [Schistosoma japonicum]
	Treg_003650	436.9	230.8	326.9	562.4	0	47.9	66.2	90	-3.36	7.35e-06	gi|256088994|ref|XP_002580604.1| hypothetical protein [Schistosoma mansoni]gi|353231359|emb|CCD77777.1| hypothetical protein Smp_097180 [Schistosoma mansoni]
	Treg_000724	2977	4163	2471	3333	1037	1510	1437	1032	-3.36	2.56e-48	gi|256070949|ref|XP_002571804.1| 60S ribosomal protein L23a [Schistosoma mansoni]gi|353228636|emb|CCD74807.1| putative 60s ribosomal protein L23a [Schistosoma mansoni]
	Treg_001025	1610	1772	1303	2041	722	921	863	707	-3.35	3.13e-47	gi|256076076|ref|XP_002574340.1| protein phosphatase-1 [Schistosoma mansoni]gi|360042785|emb|CCD78195.1| putative protein phosphatase-1 [Schistosoma mansoni]
	Treg_001229	287	144	202	302	81	93	73	87	-3.35	3.28e-50	gi|360044157|emb|CCD81704.1| hypothetical protein Smp_179020 [Schistosoma mansoni]
	Treg_000905	2839.2	3358.8	2381.2	3630.7	999.1	1214.8	1287	985.7	-3.34	1.12e-39	gi|256083113|ref|XP_002577794.1| tumor protein d52 [Schistosoma mansoni]gi|353230286|emb|CCD76457.1| putative tumor protein d52 [Schistosoma mansoni]
	Treg_004190	280.7	152.4	184.3	307	32.5	38.5	33	30.6	-3.34	3.32e-59	gi|56758102|gb|AAW27191.1| SJCHGC01293 protein [Schistosoma japonicum]
	Treg_008942	325	455	264	402	132	122	160	104	-3.34	1.47e-30	gi|56753969|gb|AAW25177.1| SJCHGC04237 protein [Schistosoma japonicum]
	Treg_000320	265	177	212	292	34	32	30	44	-3.33	1.45e-55	gi|358253026|dbj|GAA51418.1| hypothetical protein CLF_106081 [Clonorchis sinensis]
	Treg_001081	1127	557	1023	1131	395	415	478	468	-3.33	2.04e-37	gi|256088102|ref|XP_002580198.1| hypothetical protein [Schistosoma mansoni]gi|350646737|emb|CCD58651.1| hypothetical protein Smp_091870 [Schistosoma mansoni]
	Treg_000212	10608.7	6541.5	7148.9	11643.3	1986.3	2267.3	2194.8	2041.7	-3.32	2.16e-57	gi|226480688|emb|CAX73441.1| Calpain B [Schistosoma japonicum]
	Treg_003643	2033.3	1855	1068.6	2261.5	614.9	789.9	602.8	496.6	-3.32	5.88e-35	NO HIT
	Treg_003874	4225	5446	3024	5986	595	720.6	708.8	617.3	-3.32	3.28e-39	gi|256075725|ref|XP_002574167.1| PRX_like2 domain-containing protein [Schistosoma mansoni]gi|353232428|emb|CCD79783.1| PRX_like2 domain-containing protein [Schistosoma mansoni]
	Treg_011195	263	167	193	260	100	120	115	91	-3.32	6.93e-57	gi|256074684|ref|XP_002573653.1| serine/threonine-protein kinase rio1 (rio kinase 1) [Schistosoma mansoni]gi|350646083|emb|CCD59229.1| serine/threonine-protein kinase rio1 (rio kinase 1), putative [Schistosoma mansoni]
	Treg_002337	181	115	139	177	44	45	62	40	-3.32	1.91e-48	gi|360045381|emb|CCD82929.1| hypothetical protein Smp_142820 [Schistosoma mansoni]
	Treg_001101	3172	1000	2377	3223	572	764	568	632	-3.32	5e-42	gi|256088476|ref|XP_002580360.1| homeodomain transcription factor (phtf) [Schistosoma mansoni]
	Treg_009350	26.4	66.2	19.1	25.5	27.2	0	0	22.8	-3.32	0.000215	gi|256074673|ref|XP_002573648.1| ribose-phosphate pyrophosphokinase 1 [Schistosoma mansoni]gi|353230656|emb|CCD77073.1| putative ribose-phosphate pyrophosphokinase 1 [Schistosoma mansoni]
	Treg_004450	980	929	715	1096	370	475	491	403	-3.31	2.86e-51	gi|56753075|gb|AAW24747.1| SJCHGC09363 protein [Schistosoma japonicum]gi|226486460|emb|CAX74359.1| Endoplasmic reticulum-Golgi intermediate compartment protein 3 [Schistosoma japonicum]gi|226486464|emb|CAX74361.1| Endoplasmic reticulum-Golgi intermediate compartment protein 3 [Schistosoma japonicum]
	Treg_000408	3381	4856	2395	4433	1289	1625	1630	1417	-3.31	1.38e-38	gi|256087230|ref|XP_002579777.1| ubiquitin-conjugating enzyme rad6 [Schistosoma mansoni]gi|350645604|emb|CCD59729.1| ubiquitin-conjugating enzyme rad6, putative [Schistosoma mansoni]
	Treg_016314	1181.4	618.1	706.2	1210.6	109	102.3	132.1	108.4	-3.31	7.67e-53	gi|226479230|emb|CAX73110.1| putative Eps8 [Schistosoma japonicum]
	Treg_003595	1792	1437	1135	1887	583	670	670	593	-3.3	1.12e-53	gi|256083287|ref|XP_002577878.1| dihydrolipoamide S-acetyltransferase [Schistosoma mansoni]gi|350645186|emb|CCD60128.1| Pyruvate dehydrogenase protein X component,mitochondrial precursor (Dihydrolipoamide dehydrogenase-binding protein of pyruvate dehydrogenase complex) (Lipoyl-containing pyruvate dehydrogenase complex component X) (E3-binding protein) (E3BP) (proX),putative [Schistosoma mansoni]
	Treg_007679	868	1018.3	605.2	1006.9	355.1	436.8	407.9	437.8	-3.3	1.97e-37	gi|226470166|emb|CAX70364.1| putative dolichyl-phosphate (UDP-N-acetylglucosamine) N-acetylglucosaminephosphotransferase 1 (GlcNAc-1-P transferase) [Schistosoma japonicum]gi|226489737|emb|CAX75019.1| putative dolichyl-phosphate (UDP-N-acetylglucosamine) N-acetylglucosaminephosphotransferase 1 (GlcNAc-1-P transferase) [Schistosoma japonicum]
	Treg_007762	1550	1856	1125	2218	517	620	655	596	-3.3	1.25e-36	gi|56756440|gb|AAW26393.1| SJCHGC06111 protein [Schistosoma japonicum]gi|226487042|emb|CAX75386.1| isocitrate dehydrogenase (NAD+) [Schistosoma japonicum]gi|226487044|emb|CAX75387.1| isocitrate dehydrogenase (NAD+) [Schistosoma japonicum]gi|226487046|emb|CAX75388.1| isocitrate dehydrogenase (NAD+) [Schistosoma japonicum]
	Treg_003021	23	14	19	26	5	2	5	2	-3.3	4.8e-19	gi|256079098|ref|XP_002575827.1| hypothetical protein [Schistosoma mansoni]gi|360044016|emb|CCD81562.1| hypothetical protein Smp_146470 [Schistosoma mansoni]
	Treg_000456	46	22	28	36	12	13	17	11	-3.29	2.14e-16	gi|350644574|emb|CCD60695.1| adenosylhomocysteinase,putative [Schistosoma mansoni]
	Treg_016081	407	306	259	442	100	123	127	74	-3.29	2.77e-47	gi|256070090|ref|XP_002571381.1| hypothetical protein [Schistosoma mansoni]
	Treg_004095	979	1013	680	1430	276	309	313	278	-3.29	3.77e-41	gi|29841152|gb|AAP06165.1| similar to XM_084887 similar to hypothetical protein CGI-131 in Homo sapiens; hypothetical protein CGI-131 in Homo sapiens [Schistosoma japonicum]
	Treg_000969	610	816	549	704	261	359	411	279	-3.29	3.5e-36	gi|226489955|emb|CAX75128.1| purine-nucleoside phosphorylase [Schistosoma japonicum]
	Treg_008673	449.3	649.9	311.2	738.8	225.4	237.9	238.7	222.2	-3.29	1.86e-23	gi|226486884|emb|CAX74519.1| putative ATPase inhibitor B0546.1, mitochondrial precursor [Schistosoma japonicum]
	Treg_000931	745	703	559	1070	285	340	352	324	-3.28	1.77e-43	gi|353230090|emb|CCD76261.1| prenyl transferase [Schistosoma mansoni]
	Treg_007669	6987	9589	5458	8612	3228	3828	4293	2952	-3.28	1.43e-40	gi|29841440|gb|AAP06472.1| similar to GenBank Accession Number A31486 translation initiation factor eIF-5A in validated - rabbit [Schistosoma japonicum]gi|226475324|emb|CAX71950.1| eukaryotic translation initiation factor 5A [Schistosoma japonicum]gi|226475326|emb|CAX71951.1| eukaryotic translation initiation factor 5A [Schistosoma japonicum]gi|226475328|emb|CAX71952.1| eukaryotic translation ini…
	Treg_005729	38.7	24.5	30.1	40.8	11.6	32.4	7.7	0	-3.28	4.62e-09	gi|256076576|ref|XP_002574587.1| nuclear cap-binding protein [Schistosoma mansoni]gi|360043791|emb|CCD81337.1| putative nuclear cap-binding protein [Schistosoma mansoni]
	Treg_018163	348	319	308	462	126	150	191	132	-3.28	8.07e-48	gi|226490174|emb|CAX69329.1| Pleckstrin homology domain-containing family F [Schistosoma japonicum]
	Treg_003058	28	27	19	31	10	9	8	9	-3.27	1.05e-16	gi|256078791|ref|XP_002575678.1| hypothetical protein [Schistosoma mansoni]gi|353232036|emb|CCD79391.1| hypothetical protein Smp_043360 [Schistosoma mansoni]
	Treg_004082	23	2	29	23	3	5	4	1	-3.27	3.67e-08	NO HIT
	Treg_007844	2052	2221	1469	2046	875	950	1109	712	-3.27	1.83e-37	gi|256080881|ref|XP_002576704.1| Glutathione S-transferase 28 kDa (GST 28) (GST class-mu) [Schistosoma mansoni]gi|121700|sp|P09792.1|GST28_SCHMA RecName: Full=Glutathione S-transferase class-mu 28 kDa isozyme; Short=GST 28; AltName: Full=GSH transferase S.m. 1-1; AltName: Full=Protective 28 kDa antigen; AltName: Full=Sm28 antigen; AltName: Full=Sm28GST; AltName: Full=Smp28gi|10164|emb|CAA28796.1|…
	Treg_005750	39	43	36	59	18	25.1	11	20	-3.26	1.59e-20	NO HIT
	Treg_005247	5	12.9	16.9	18	5.3	3.1	3.5	9.4	-3.25	6.31e-09	NO HIT
	Treg_009768	643	555	454	666	183	199	224	200	-3.25	8.36e-48	gi|358339206|dbj|GAA47314.1| protein-tyrosine sulfotransferase, partial [Clonorchis sinensis]
	Treg_001057	471.7	612.5	375.7	540.1	134.8	230.6	191.5	158.4	-3.25	8.69e-42	gi|256089193|ref|XP_002580699.1| hypothetical protein [Schistosoma mansoni]gi|350644421|emb|CCD60839.1| hypothetical protein Smp_176260.2 [Schistosoma mansoni]
	Treg_000187	836.4	545.6	705.5	865.6	313.8	390.4	329.3	365	-3.25	8.52e-54	gi|256078308|ref|XP_002575438.1| glycyl-tRNA synthetase [Schistosoma mansoni]gi|360043345|emb|CCD78758.1| putative glycyl-tRNA synthetase [Schistosoma mansoni]
	Treg_001436	463.1	169.6	241.8	373.8	96	111.8	101	85	-3.24	1.2e-45	gi|256086242|ref|XP_002579311.1| hypothetical protein [Schistosoma mansoni]
	Treg_009498	957	796	728	1522	263	336	299	305	-3.24	1.35e-46	gi|56755691|gb|AAW26024.1| SJCHGC04817 protein [Schistosoma japonicum]
	Treg_000118	1186.6	256.7	1135.4	1380	359.5	452.5	359.9	335.5	-3.24	1.84e-19	gi|358333454|dbj|GAA51961.1| transient receptor potential cation channel CG34123 [Clonorchis sinensis]
	Treg_018023	316	54	398	323	120	116	110	109	-3.24	7.29e-14	gi|353233724|emb|CCD81078.1| putative tensin [Schistosoma mansoni]
	Treg_003258	15	4	9	12	3	3	0	2	-3.24	1.18e-10	gi|256071817|ref|XP_002572235.1| hypothetical protein [Schistosoma mansoni]gi|350644781|emb|CCD60488.1| hypothetical protein Smp_126220 [Schistosoma mansoni]
	Treg_000732	314	272	300	350	163	183	154	151	-3.24	1.46e-53	gi|226478936|emb|CAX72963.1| hypothetical protein [Schistosoma japonicum]
	Treg_002838	32	18	31	13	3	3	7	5	-3.23	3e-16	gi|507945516|ref|XP_004681911.1| PREDICTED: GTP cyclohydrolase 1 isoform X1 [Condylura cristata]
	Treg_001490	802	749	473	1001	195	221	283	201	-3.23	4.92e-38	gi|256087452|ref|XP_002579883.1| short chain dehydrogenase [Schistosoma mansoni]gi|353229946|emb|CCD76117.1| putative short chain dehydrogenase [Schistosoma mansoni]
	Treg_000520	1127.9	1548.5	875.4	1508.1	162.2	189	209.3	161	-3.22	2.61e-30	gi|353232816|emb|CCD80172.1| unnamed protein product [Schistosoma mansoni]
	Treg_001736	567	446	521	778	167	187	192	166	-3.22	4.95e-51	gi|350646843|emb|CCD58564.1| unnamed protein product [Schistosoma mansoni]
	Treg_002988	152	24	602	192	102	113	84	138	-3.22	3.23e-06	gi|256086989|ref|XP_002579663.1| hypothetical protein [Schistosoma mansoni]
	Treg_019209	15	6	3	5	0	0	0	0	-3.22	7.43e-11	NO HIT
	Treg_000236	7163.5	5431.4	5093.6	10124.5	1631.8	1729.9	1958	1862.6	-3.22	3.43e-47	gi|56756008|gb|AAW26182.1| SJCHGC01945 protein [Schistosoma japonicum]
	Treg_003682	1851.9	1876.9	1493.5	1749	901.5	974	956.8	763.3	-3.22	1.95e-41	gi|360044259|emb|CCD81806.1| putative nucleolar protein NOP56 [Schistosoma mansoni]
	Treg_003978	41	42.4	31.4	46	18.7	17.6	15.5	5.6	-3.22	2.79e-16	gi|256073354|ref|XP_002572996.1| hypothetical protein [Schistosoma mansoni]gi|350645259|emb|CCD60040.1| hypothetical protein Smp_130460 [Schistosoma mansoni]
	Treg_000575	159.1	218.8	130.4	212.6	52.3	91.6	89.1	70.1	-3.21	2.41e-29	gi|256082950|ref|XP_002577714.1| tRNA selenocysteine associated protein (secp43) [Schistosoma mansoni]gi|360043607|emb|CCD81153.1| putative trna selenocysteine associated protein (secp43) [Schistosoma mansoni]
	Treg_000143	682.5	819.5	439.3	794.6	213.6	274.7	229.4	246.5	-3.21	1.72e-31	gi|256087495|ref|XP_002579904.1| hypothetical protein [Schistosoma mansoni]gi|353230573|emb|CCD76990.1| hypothetical protein Smp_088720 [Schistosoma mansoni]
	Treg_000421	1836	988	1427	2020	676	877	793	816	-3.2	3.1e-52	gi|226468594|emb|CAX69974.1| putative tRNA pseudouridine synthase 3 [Schistosoma japonicum]
	Treg_001055	2321	2109.3	1639.9	3025.1	935.7	1185.6	1145.8	969.8	-3.19	1.06e-52	NO HIT
	Treg_002695	86	88.8	65.3	102	17.7	45	28.2	33.7	-3.18	1.69e-24	gi|353229078|emb|CCD75249.1| lysyl oxidase-like [Schistosoma mansoni]
	Treg_000754	710	551.3	439.6	711.5	178.5	228.6	243.6	220.3	-3.18	1.06e-46	gi|56753151|gb|AAW24785.1| SJCHGC06165 protein [Schistosoma japonicum]gi|226479864|emb|CAX73228.1| Ataxin-3 [Schistosoma japonicum]
	Treg_003624	2206.3	1611	1424.6	2653	921.4	1050.8	1119.7	928.6	-3.18	5.05e-45	gi|256080337|ref|XP_002576438.1| UDP-N-acetylglucosamine--dolichyl-phosphate N-acetylglucosaminephosphotransferase [Schistosoma mansoni]gi|350645545|emb|CCD59785.1| UDP-N-acetylglucosamine--dolichyl-phosphate N-acetylglucosaminephosphotransferase [Schistosoma mansoni]
	Treg_001506	834	546	724	847	240	234	303	211	-3.18	2.2e-48	gi|226466556|emb|CAX69413.1| hypothetical protein [Schistosoma japonicum]
	Treg_001016	2584.6	3328.8	1815.9	3789.8	1412	1795.1	1714.4	1471.9	-3.17	4.63e-28	gi|256082167|ref|XP_002577332.1| mitochondrial ATP synthase B chain [Schistosoma mansoni]gi|353232631|emb|CCD79985.1| putative mitochondrial ATP synthase B chain [Schistosoma mansoni]
	Treg_002984	28	8	16	14	5	10	12	4	-3.17	2.26e-11	gi|350646271|emb|CCD58997.1| hypothetical protein Smp_000350.2 [Schistosoma mansoni]
	Treg_003887	399	101	273	264	67	112	96	81	-3.16	1.2e-27	gi|256071381|ref|XP_002572019.1| serine/threonine protein kinase [Schistosoma mansoni]
	Treg_000292	2239	2263	1643	3277	1090	1477	1463	1208	-3.16	2.05e-38	gi|56753822|gb|AAW25108.1| SJCHGC01665 protein [Schistosoma japonicum]gi|226486990|emb|CAX75360.1| NADH dehydrogenase (ubiquinone) flavoprotein 1 [Schistosoma japonicum]
	Treg_009389	351	343	257	372	177	175	209	182	-3.15	6.53e-39	gi|256073020|ref|XP_002572831.1| hypothetical protein [Schistosoma mansoni]gi|360042896|emb|CCD78306.1| hypothetical protein Smp_013570 [Schistosoma mansoni]
	Treg_002168	355	270	256	393	107	127	156	118	-3.15	2.11e-49	gi|56754381|gb|AAW25378.1| SJCHGC06102 protein [Schistosoma japonicum]
	Treg_000330	5955.4	2825.4	6892.6	6354.6	1755.8	2064.6	2057.9	2034.4	-3.15	2.04e-43	gi|360043333|emb|CCD78746.1| putative endoplasmin [Schistosoma mansoni]
	Treg_004221	204	31.8	265	213	71.1	98.2	56.4	69.1	-3.15	5.88e-12	gi|350645601|emb|CCD59726.1| hypothetical protein Smp_169420 [Schistosoma mansoni]
	Treg_001037	395	134	252	326	87	102	99	92	-3.15	9.82e-38	gi|226490226|emb|CAX69355.1| cyclin-dependent kinase-like 1 [Schistosoma japonicum]
	Treg_006428	2494	569	8856	2923	1003	1121	934	976	-3.14	4.68e-12	gi|353231776|emb|CCD79131.1| hypothetical protein Smp_038730.10 [Schistosoma mansoni]
	Treg_000455	1869	2984	1340	2785	842	1067	1173	819	-3.13	1.87e-35	gi|226468182|emb|CAX76318.1| hypothetical protein [Schistosoma japonicum]gi|226468184|emb|CAX76319.1| hypothetical protein [Schistosoma japonicum]gi|226468186|emb|CAX76320.1| hypothetical protein [Schistosoma japonicum]gi|226472656|emb|CAX71014.1| hypothetical protein [Schistosoma japonicum]gi|226482656|emb|CAX73927.1| hypothetical protein [Schistosoma japonicum]
	Treg_009093	1092	602	929	1013	283	312	321	285	-3.13	1.89e-52	gi|350644597|emb|CCD60680.1| retinaldehyde binding protein-related [Schistosoma mansoni]
	Treg_000641	809	799	616	989	296	388	407	398	-3.13	4.63e-39	gi|256073047|ref|XP_002572844.1| hypothetical protein [Schistosoma mansoni]gi|353228563|emb|CCD74734.1| hypothetical protein Smp_013690 [Schistosoma mansoni]
	Treg_006629	86.8	100.7	56.9	70.8	30.3	40	29.7	25.3	-3.12	1.05e-17	NO HIT
	Treg_010898	197	292	157	234	72	86	103	60	-3.12	1.5e-26	gi|56753521|gb|AAW24964.1| SJCHGC03760 protein [Schistosoma japonicum]
	Treg_005499	664	496.6	499	768	293.8	415	412.2	377.2	-3.12	1.72e-49	gi|226468544|emb|CAX69949.1| F-box only protein 9 [Schistosoma japonicum]
	Treg_001853	214.7	61.4	124.6	136.2	48.1	46.4	49.7	55	-3.11	6.55e-30	gi|256087623|ref|XP_002579965.1| intermediate filament proteins [Schistosoma mansoni]
	Treg_015207	1881	2442	1343	2828	709	1048	942	757	-3.11	1.18e-25	gi|256077965|ref|XP_002575269.1| ATP synthase delta chain [Schistosoma mansoni]gi|350645958|emb|CCD59365.1| ATP synthase delta chain, putative [Schistosoma mansoni]
	Treg_017544	2331.9	1445.5	1630.7	2696.4	561.1	716	633.3	625.5	-3.11	1.32e-53	gi|353233603|emb|CCD80957.1| hypothetical protein Smp_003270 [Schistosoma mansoni]
	Treg_000310	2218.2	1343.6	1651.4	2363.1	523.5	574.7	624.2	586.4	-3.1	2.67e-52	gi|29841008|gb|AAP06021.1| similar to XM_080170 misexpression suppressor of KSR 2 in Drosophila melanogaster [Schistosoma japonicum]
	Treg_005769	794.5	306.4	638.6	945.5	279.1	271.9	291.3	233.7	-3.09	2.78e-29	gi|226486572|emb|CAX74363.1| solute carrier family 33 (acetyl-CoA transporter), member 1 [Schistosoma japonicum]
	Treg_003826	898.7	200.3	4446.6	1110.9	300	480.7	282.8	554.2	-3.09	9.85e-08	gi|350646247|emb|CCD59081.1| lamin, putative [Schistosoma mansoni]
	Treg_017295	81	135	86	137	38	58	51	54	-3.09	1.42e-20	gi|256052897|ref|XP_002569985.1| hypothetical protein [Schistosoma mansoni]
	Treg_014729	337.7	430.4	321.3	520.4	165	216	236.8	173.4	-3.09	7.71e-35	gi|226488849|emb|CAX74774.1| hypothetical protein [Schistosoma japonicum]
	Treg_000910	749.7	853.4	597.1	859.4	489.5	544.9	517.2	422.3	-3.08	1.67e-38	gi|56758264|gb|AAW27272.1| SJCHGC05625 protein [Schistosoma japonicum]
	Treg_005879	34.4	42.3	15.3	31.4	9.5	18.7	13.6	19.1	-3.08	4.06e-12	gi|56755393|gb|AAW25876.1| SJCHGC00601 protein [Schistosoma japonicum]
	Treg_002191	939.6	652.6	615.5	999.3	401.4	436	359.2	462	-3.08	2.37e-44	gi|353231116|emb|CCD77534.1| hypothetical protein Smp_134670.1 [Schistosoma mansoni]
	Treg_011698	365	472	187	389	124	132	165	103	-3.08	7.11e-26	gi|256082089|ref|XP_002577295.1| hypothetical protein [Schistosoma mansoni]gi|360044394|emb|CCD81942.1| hypothetical protein Smp_059930 [Schistosoma mansoni]
	Treg_000010	2763	1391	2200	3461	1001	1185	927	1035	-3.08	7.07e-41	gi|256080462|ref|XP_002576500.1| hypothetical protein [Schistosoma mansoni]
	Treg_004497	45.2	3.8	37.5	30.3	14.4	10.7	12.4	14.1	-3.08	1.14e-08	gi|256074095|ref|XP_002573362.1| hypothetical protein [Schistosoma mansoni]gi|350646816|emb|CCD58537.1| hypothetical protein Smp_132630 [Schistosoma mansoni]
	Treg_003862	1931	2234	1415	2649	292	386	369	278	-3.08	2.61e-33	gi|256070445|ref|XP_002571553.1| hypothetical protein [Schistosoma mansoni]gi|353230509|emb|CCD76680.1| hypothetical protein Smp_000820.1 [Schistosoma mansoni]
	Treg_011497	484	226	352	449	145	142	136	131	-3.07	3.21e-46	gi|256084312|ref|XP_002578374.1| hypothetical protein [Schistosoma mansoni]
	Treg_002025	171.8	78.7	120.1	136.6	24.5	70.4	49.1	52.3	-3.07	7.02e-29	gi|256087940|ref|XP_002580119.1| hypothetical protein [Schistosoma mansoni]gi|360044127|emb|CCD81674.1| kh-domain rna binding protein-related [Schistosoma mansoni]
	Treg_014891	9767	12504	6623	9933	3918	4643	5092	3446	-3.06	1e-35	NO HIT
	Treg_002475	443	419	292	587	158	171	191	182	-3.06	3.94e-40	gi|256070632|ref|XP_002571647.1| centaurin alpha [Schistosoma mansoni]gi|353231187|emb|CCD77605.1| putative centaurin alpha [Schistosoma mansoni]
	Treg_000974	28	15	31	29	5	8	7	3	-3.05	4.02e-19	NO HIT
	Treg_001718	1219	439	940	985	124	126	146	137	-3.05	4.58e-43	gi|256076214|ref|XP_002574408.1| hypothetical protein [Schistosoma mansoni]gi|360043260|emb|CCD78673.1| hypothetical protein Smp_138210 [Schistosoma mansoni]
	Treg_020513	561.6	796.9	451.7	736.8	300.8	352.2	374.4	305.5	-3.05	1.38e-24	gi|350644436|emb|CCD60833.1| hypothetical protein Smp_212230 [Schistosoma mansoni]
	Treg_011982	144.2	60.2	96.4	181.4	21.1	23.6	25.3	20.8	-3.05	2.2e-39	gi|20151391|gb|AAM11055.1| GH10821p [Drosophila melanogaster]
	Treg_000047	14.5	2.4	22.8	12.6	6.6	2.4	2.2	0	-3.04	9.13e-06	gi|29841244|gb|AAP06276.1| similar to GenBank Accession Number AY044241 glutamine synthetase [Schistosoma japonicum]gi|226481437|emb|CAX73616.1| glutamate-ammonia ligase (glutamine synthetase) [Schistosoma japonicum]
	Treg_017911	97	66	87	108	37	39	25	39	-3.03	7.31e-31	gi|256084616|ref|XP_002578523.1| protein kinase [Schistosoma mansoni]gi|353228694|emb|CCD74865.1| protein kinase [Schistosoma mansoni]
	Treg_005194	32.5	16.4	36.7	36.4	11.8	16.1	14.5	17.5	-3.03	1.77e-14	gi|555934991|emb|CDJ12111.1| Partitioning defective 3 protein B [Hymenolepis microstoma]
	Treg_000176	1636.6	577.1	2427.6	1919.7	709.1	866.1	661.1	753.3	-3.03	7.24e-18	gi|350646310|emb|CCD59036.1| filamin [Schistosoma mansoni]
	Treg_006732	1571	430	1281	1257	321	373	401	384	-3.03	1.77e-29	gi|256084050|ref|XP_002578246.1| hypothetical protein [Schistosoma mansoni]gi|353228418|emb|CCD74589.1| putative tbc1 domain family member 2 (prostate antigen recognized and indentified by serex) (paris-1) [Schistosoma mansoni]
	Treg_000485	2803	545	3895	2913	912	1109	784	1030	-3.03	2.28e-14	gi|256082020|ref|XP_002577261.1| unkempt protein [Schistosoma mansoni]
	Treg_007685	1607	1450	1140	2018	587	710	697	604	-3.03	5.72e-47	gi|256076720|ref|XP_002574658.1| neuroendocrine differentiation factor [Schistosoma mansoni]gi|350645298|emb|CCD60013.1| neuroendocrine differentiation factor, putative [Schistosoma mansoni]
	Treg_006187	704.4	829.1	523.5	913	380.7	471.3	443.3	355.3	-3.02	4.96e-36	NO HIT
	Treg_001333	1468	1572	1056	1705	511	576	528	469	-3.02	1.71e-36	gi|56753858|gb|AAW25126.1| SJCHGC04172 protein [Schistosoma japonicum]
	Treg_001419	838	372	494	734	228	270	277	208	-3.02	1.39e-36	gi|360044052|emb|CCD81599.1| hypothetical protein Smp_174870, partial [Schistosoma mansoni]
	Treg_004201	350.4	536.1	380	537.1	54	81.9	102.9	79.5	-3.01	1.2e-26	gi|226467704|emb|CAX69728.1| hypothetical protein [Schistosoma japonicum]
	Treg_004216	21.8	12.9	13.1	17.7	10.1	8.8	6.1	9.1	-3.01	1.61e-10	gi|226489749|emb|CAX75025.1| Craniofacial development protein 1 [Schistosoma japonicum]gi|226489751|emb|CAX75026.1| Craniofacial development protein 1 [Schistosoma japonicum]
	Treg_017790	1155.7	366.2	694.5	829.6	96.7	115.6	116.1	130.3	-3.01	2.43e-40	gi|256082387|ref|XP_002577438.1| Sp17 protein [Schistosoma mansoni]gi|350646720|emb|CCD58634.1| Sp17 protein , putative [Schistosoma mansoni]
	Treg_001578	376.1	318.1	244.5	390.4	186.2	217.7	221.4	173.4	-3	5.91e-40	gi|256086667|ref|XP_002579518.1| chromatin regulatory protein sir2 [Schistosoma mansoni]
	Treg_001245	833.7	643.9	699.1	889.7	335.3	301	427.4	303	-3	4.21e-37	gi|76156360|gb|AAX27572.2| SJCHGC09561 protein [Schistosoma japonicum]
	Treg_003723	45.6	20.8	39.5	37.6	12.6	19.9	7.1	11.3	-3	3.16e-11	gi|470253510|ref|XP_004359853.1| calcium-binding protein [Dictyostelium fasciculatum]gi|328873635|gb|EGG22002.1| calcium-binding protein [Dictyostelium fasciculatum]
	Treg_007452	4457	2581	3553	4635	795.9	834	721.6	701.4	-3	6.61e-49	gi|256071767|ref|XP_002572210.1| alpha-actinin [Schistosoma mansoni]gi|353229404|emb|CCD75575.1| putative alpha-actinin [Schistosoma mansoni]
	Treg_000012	137.9	150	102.9	168.1	22.1	17.1	34.8	43.8	-3	2.23e-24	gi|226469038|emb|CAX69998.1| hypothetical protein [Schistosoma japonicum]
	Treg_000150	386	395	231	496	154	170	199	152	-2.99	2.79e-33	gi|256086563|ref|XP_002579467.1| cystathionine beta-lyase [Schistosoma mansoni]gi|353229670|emb|CCD75841.1| putative cystathionine beta-lyase [Schistosoma mansoni]
	Treg_001597	1226	476	801.9	1182.8	273	385	296	287	-2.99	3.58e-42	gi|360043143|emb|CCD78555.1| hox protein Smox1 [Schistosoma mansoni]
	Treg_004212	241	352	225	361	105	147	122	104	-2.99	2.56e-29	gi|256079114|ref|XP_002575835.1| hypothetical protein [Schistosoma mansoni]
	Treg_006246	1466	853	1040	1499	472	457	583	561	-2.98	4.9e-44	gi|226466570|emb|CAX69420.1| putative phospholipase DDHD1 [Schistosoma japonicum]
	Treg_003904	3673	5328	2593	4669	1205	1382	1669	1107	-2.98	2.76e-37	gi|256092916|ref|XP_002582123.1| malate dehydrogenase [Schistosoma mansoni]gi|353228833|emb|CCD75004.1| putative malate dehydrogenase [Schistosoma mansoni]
	Treg_000269	142.1	140.6	140.1	165.7	50.6	71.2	87.3	49.4	-2.97	4.64e-34	gi|56755763|gb|AAW26060.1| SJCHGC05185 protein [Schistosoma japonicum]
	Treg_000527	1387	1906	962	1991	844	985	1107	812	-2.97	1.25e-24	gi|56752597|gb|AAW24512.1| SJCHGC05423 protein [Schistosoma japonicum]gi|226489330|emb|CAX75809.1| succinate dehydrogenase complex, subunit C, integral membrane protein [Schistosoma japonicum]gi|226489332|emb|CAX75810.1| succinate dehydrogenase complex, subunit C, integral membrane protein [Schistosoma japonicum]gi|226489334|emb|CAX75811.1| succinate dehydrogenase complex, subunit C, integral mem…
	Treg_004054	400	261	284	421	140	189	172	192	-2.97	3.78e-47	gi|256079169|ref|XP_002575862.1| adiponectin receptor [Schistosoma mansoni]gi|350645712|emb|CCD59687.1| adiponectin receptor, putative [Schistosoma mansoni]
	Treg_000437	723.5	563	520.8	806.3	249.2	253.3	278.9	264.9	-2.97	7.7e-44	gi|56755599|gb|AAW25978.1| SJCHGC05814 protein [Schistosoma japonicum]
	Treg_017513	106.8	24.4	119.9	69.6	28.2	55.1	23	24.9	-2.97	1.06e-11	gi|353230445|emb|CCD76616.1| putative nucleolar protein c7b [Schistosoma mansoni]
	Treg_008361	2737	1022	2174	2577	778	919	832	712	-2.97	4.76e-33	gi|256089214|ref|XP_002580709.1| trim56 protein [Schistosoma mansoni]gi|350644639|emb|CCD60636.1| trim56 protein, putative [Schistosoma mansoni]
	Treg_016928	616	506	468	807	240	263	287	240	-2.97	1e-41	gi|256085027|ref|XP_002578726.1| hypothetical protein [Schistosoma mansoni]gi|350645849|emb|CCD59453.1| hypothetical protein Smp_075440.1 [Schistosoma mansoni]
	Treg_000352	1729	2086	1183	2492	712	922	937	795	-2.96	1.63e-27	gi|256081279|ref|XP_002576899.1| Isocitrate dehydrogenase [NAD] subunit gamma mitochondrial [Schistosoma mansoni]gi|353228522|emb|CCD74693.1| putative isocitrate dehydrogenase [NAD] subunit gamma,mitochondrial [Schistosoma mansoni]
	Treg_009041	31.6	66.2	21.6	41.7	20.3	25.5	18.6	21.4	-2.96	4.01e-09	gi|108861845|gb|ABG21824.1| nuclear DNA-binding protein-like protein [Schistosoma mansoni]
	Treg_011761	63	71	40.4	99.5	24.4	40.4	40	27	-2.95	1.17e-20	gi|56753297|gb|AAW24852.1| SJCHGC09007 protein [Schistosoma japonicum]
	Treg_004158	322	184	254	351	45	68	45	48	-2.95	1.64e-48	gi|256081161|ref|XP_002576841.1| hypothetical protein [Schistosoma mansoni]gi|353232502|emb|CCD79857.1| hypothetical protein Smp_151840 [Schistosoma mansoni]
	Treg_016179	2658	3364	1146	2995	1128	1318	1560	1002	-2.95	4.31e-26	gi|256072871|ref|XP_002572757.1| hypothetical protein [Schistosoma mansoni]gi|353229126|emb|CCD75297.1| hypothetical protein Smp_129080 [Schistosoma mansoni]
	Treg_002215	163	141	106	149	33	34	24	30	-2.94	4.05e-38	NO HIT
	Treg_004292	43	11.7	5.7	38.6	9.8	27.2	12.5	0	-2.94	4.14e-05	gi|256075584|ref|XP_002574098.1| hypothetical protein [Schistosoma mansoni]gi|360045425|emb|CCD82973.1| hypothetical protein Smp_136510 [Schistosoma mansoni]
	Treg_000840	136	122	88	111	36	61	52	48	-2.93	9.91e-30	gi|256074669|ref|XP_002573646.1| hypothetical protein [Schistosoma mansoni]gi|353230654|emb|CCD77071.1| hypothetical protein Smp_022070 [Schistosoma mansoni]
	Treg_002572	35	11	24	34	7	13	5	11	-2.92	1.42e-10	NO HIT
	Treg_006301	5614.9	4785.4	3506.7	6810.3	1749.7	2175.2	2004.5	1888.8	-2.92	1.23e-37	gi|56757821|gb|AAW27051.1| SJCHGC00735 protein [Schistosoma japonicum]gi|226467778|emb|CAX69765.1| AN1-type zinc finger protein 6 (Zinc finger A20 domain-containing protein 3) [Schistosoma japonicum]gi|226482386|emb|CAX73792.1| AN1-type zinc finger protein 6 (Zinc finger A20 domain-containing protein 3) [Schistosoma japonicum]
	Treg_001032	418	437	313	461	168.9	179	194	127	-2.92	1.32e-33	gi|256086180|ref|XP_002579282.1| hypothetical protein [Schistosoma mansoni]gi|353230332|emb|CCD76503.1| hypothetical protein Smp_081920 [Schistosoma mansoni]
	Treg_001211	108	84	71	96	33	35	59	44	-2.92	1.71e-26	gi|256077897|ref|XP_002575236.1| hypothetical protein [Schistosoma mansoni]gi|353231777|emb|CCD79132.1| hypothetical protein Smp_143220 [Schistosoma mansoni]
	Treg_010853	235.2	168	148	236	93	97.2	79.3	90.7	-2.92	1.2e-37	gi|256072661|ref|XP_002572653.1| hypothetical protein [Schistosoma mansoni]gi|353230852|emb|CCD77269.1| hypothetical protein Smp_128530 [Schistosoma mansoni]gi|353230853|emb|CCD77270.1| hypothetical protein Smp_128520 [Schistosoma mansoni]
	Treg_009097	504	526	290	605	309	374	344	290	-2.92	2.95e-25	gi|226490172|emb|CAX69328.1| glutathione synthetase [Schistosoma japonicum]
	Treg_000250	1326	888	1156	1409	213	228	213	178	-2.92	2.3e-45	gi|226480548|emb|CAX73371.1| RAP1B, member of RAS oncogene family [Schistosoma japonicum]
	Treg_001912	133.6	189.8	123.7	210.5	60.5	92.1	111.7	67.6	-2.91	3.07e-23	gi|56756837|gb|AAW26590.1| SJCHGC05983 protein [Schistosoma japonicum]
	Treg_005954	48.8	29.1	12.9	35.1	24.5	17.2	11.5	9.3	-2.91	4.46e-10	gi|256078572|ref|XP_002575569.1| hypothetical protein [Schistosoma mansoni]gi|353232340|emb|CCD79695.1| hypothetical protein Smp_145050 [Schistosoma mansoni]
	Treg_002043	299	419	245	348	207	259	213	204	-2.9	1.66e-22	gi|171473982|gb|AAX30243.3| SJCHGC02237 protein [Schistosoma japonicum]
	Treg_002446	60	30	54	72	21	31	29	28	-2.9	7.59e-18	gi|256084434|ref|XP_002578434.1| hypothetical protein [Schistosoma mansoni]
	Treg_000508	1996	1361	1339	2375	901	1070	978	980	-2.9	2.32e-46	gi|353232879|emb|CCD80235.1| putative gtp binding protein [Schistosoma mansoni]
	Treg_000678	957	1159	693	1300	581	702	713	558	-2.89	6.01e-27	gi|29841262|gb|AAP06294.1| similar to probable NADH-ubiquinone oxidoreductase 20 kDa subunit precursor; complex I-20kC; CI-20KD [Schistosoma japonicum]gi|226470044|emb|CAX70303.1| NADH dehydrogenase (ubiquinone) Fe-S protein 7 [Schistosoma japonicum]
	Treg_018143	430	404	302	436	223	213	230	211	-2.89	3.09e-41	gi|256070681|ref|XP_002571671.1| nep1 [Schistosoma mansoni]gi|353232976|emb|CCD80331.1| putative nep1 [Schistosoma mansoni]
	Treg_001671	454	412	361	546	147	187	173	157	-2.88	5.64e-42	gi|350645896|emb|CCD59441.1| 1-acyl-sn-glycerol-3-phosphate acyltransferase epsilon, fragment [Schistosoma mansoni]
	Treg_000001	5694	6360	3475	5660	2511	3163	3385	2199	-2.87	1.4e-30	gi|358332502|dbj|GAA51144.1| large subunit ribosomal protein L24e [Clonorchis sinensis]
	Treg_000244	2656.2	2007.9	1684.1	2777.7	1392	1546.7	1605.5	1229.7	-2.87	4.67e-40	gi|226472700|emb|CAX71036.1| Tropomyosin-2 [Schistosoma japonicum]
	Treg_001015	814	462	601	701	103.6	112.5	108.6	116.7	-2.87	2.5e-46	NO HIT
	Treg_001265	1458	1427	1094	1646	479	579	517	467	-2.87	2.91e-37	gi|256084065|ref|XP_002578253.1| transaldolase [Schistosoma mansoni]gi|350644991|emb|CCD60318.1| transaldolase [Schistosoma mansoni]
	Treg_001420	203.9	105.1	133.6	197.3	33.2	41.8	33.9	31.1	-2.87	8.09e-48	gi|256085553|ref|XP_002578983.1| protein kinase cgmp-dependent type I (fragment) [Schistosoma mansoni]gi|353233141|emb|CCD80496.1| putative protein kinase, cgmp-dependent, type I (fragment) [Schistosoma mansoni]
	Treg_000561	1902	1706	1306	2219	1018	1191	1286	1081	-2.87	1.25e-40	gi|256079257|ref|XP_002575905.1| atlastin [Schistosoma mansoni]gi|360044853|emb|CCD82401.1| putative atlastin [Schistosoma mansoni]
	Treg_015360	1052	486	881	1239	390	481	499	417	-2.87	2.61e-39	gi|256072716|ref|XP_002572680.1| tyrosine kinase [Schistosoma mansoni]
	Treg_000245	1985.6	2264.5	1432.4	2209.6	948.5	1272.6	1055.8	1013.8	-2.87	4.9e-39	gi|226468642|emb|CAX76349.1| Tropomyosin-2 [Schistosoma japonicum]
	Treg_000268	1728	506	1326	1603	264	265	159	212	-2.86	1.04e-28	gi|256086606|ref|XP_002579488.1| protein phosphatase 1 binding protein [Schistosoma mansoni]gi|350646318|emb|CCD59044.1| protein phosphatase 1 binding protein, putative [Schistosoma mansoni]
	Treg_003724	55.8	18.2	63.2	73.2	19.4	43.1	19.6	19.4	-2.86	2.01e-10	gi|350855160|emb|CCD58127.1| hypothetical protein Smp_154000.1 [Schistosoma mansoni]
	Treg_003958	61	32	39	44	9	10	16	9	-2.86	1.28e-25	gi|358336709|dbj|GAA37006.2| polycystin 2 [Clonorchis sinensis]
	Treg_011090	861	293	457	636	188	237	203	208	-2.86	1.59e-34	gi|256071872|ref|XP_002572262.1| hypothetical protein [Schistosoma mansoni]gi|360043811|emb|CCD81357.1| hypothetical protein Smp_126360 [Schistosoma mansoni]
	Treg_000828	159.8	68.6	127.7	154.4	67.6	61.3	73.9	47.7	-2.86	4.6e-20	gi|226484700|emb|CAX74259.1| Cell division cycle and apoptosis regulator protein 1 [Schistosoma japonicum]
	Treg_008703	3487	4857	2866.2	4468.3	1897.8	2460.8	2574.8	1776.2	-2.85	1.93e-33	gi|94449819|gb|ABF19508.1| unknown [Schistosoma japonicum]gi|226474526|emb|CAX71749.1| small subunit ribosomal protein S30e [Schistosoma japonicum]gi|226474528|emb|CAX71750.1| small subunit ribosomal protein S30e [Schistosoma japonicum]gi|226474530|emb|CAX71751.1| small subunit ribosomal protein S30e [Schistosoma japonicum]gi|226476160|emb|CAX77931.1| small subunit ribosomal protein S30e [Schisto…
	Treg_015962	2615.3	450.7	8676.4	3002.1	2100	2742.4	2072.2	2875.9	-2.85	1.11e-05	gi|350646247|emb|CCD59081.1| lamin, putative [Schistosoma mansoni]
	Treg_000661	325.8	463.5	272.6	439.1	172.7	261.5	246.9	210.5	-2.85	5.84e-23	gi|29841375|gb|AAP06407.1| similar to GenBank Accession Number CAD22100 RNase Z in Arabidopsis thaliana [Schistosoma japonicum]
	Treg_016170	475	278	418	579	194	213	195	177	-2.85	4.12e-45	gi|256093057|ref|XP_002582192.1| hypothetical protein [Schistosoma mansoni]
	Treg_001303	518.6	564.7	445.4	747.6	344.9	426.2	469.3	382.1	-2.85	7.47e-32	gi|256092942|ref|XP_002582136.1| mitochondrial ribosomal protein L24 [Schistosoma mansoni]gi|353228821|emb|CCD74992.1| putative mitochondrial ribosomal protein L24 [Schistosoma mansoni]
	Treg_001771	250	89	154	168	36	45	26	40	-2.85	1.19e-32	gi|256084550|ref|XP_002578491.1| tubulin tyrosine ligase [Schistosoma mansoni]gi|353229247|emb|CCD75418.1| tubulin tyrosine ligase-related [Schistosoma mansoni]
	Treg_001509	124	123	82	139	18	43	32	20	-2.85	3.25e-27	gi|256080268|ref|XP_002576404.1| orf protein [Schistosoma mansoni]gi|353233356|emb|CCD80711.1| putative orf protein [Schistosoma mansoni]
	Treg_017294	438	305	327	404	124	168	155	136	-2.84	1.12e-47	gi|226479966|emb|CAX73279.1| hypothetical protein [Schistosoma japonicum]
	Treg_000194	9961.5	6166.4	5832.3	9249	3083.9	3632.1	3394.9	3057.9	-2.84	9.75e-36	gi|42559587|sp|Q26503.1|TPM_SCHHA RecName: Full=Tropomyosingi|1196871|gb|AAA88530.1| tropomyosin [Schistosoma haematobium]
	Treg_003265	9	13	8	17	5	11	10	5	-2.83	1.79e-09	NO HIT
	Treg_004641	221	124	158.6	240.5	81.6	123.6	111	82	-2.83	2.53e-30	gi|350855014|emb|CAZ36043.2| hypothetical protein Smp_169720.2 [Schistosoma mansoni]
	Treg_009167	481	656	358	516	243	315	349	309	-2.83	6.5e-21	gi|256087610|ref|XP_002579959.1| hypothetical protein [Schistosoma mansoni]gi|353229281|emb|CCD75452.1| hypothetical protein Smp_089220 [Schistosoma mansoni]
	Treg_014568	3193	1718.1	2630.1	3339.1	1182.5	1702.3	1375.4	1133.5	-2.83	1.15e-39	gi|45477549|gb|AAS66088.1| tropomyosin [Schistosoma turkestanicum]
	Treg_005686	190.1	195.6	191.8	292.7	73.5	162.2	171.4	100.6	-2.83	5.57e-31	gi|29841091|gb|AAP06104.1| similar to XM_008459 EAP30 subunit of ELL complex, ELL complex EAP30 subunit [Schistosoma japonicum]
	Treg_003976	1606	632	1256	1791	537	657	613	590	-2.83	1.18e-38	gi|256080865|ref|XP_002576696.1| serine/threonine protein kinase [Schistosoma mansoni]gi|350644848|emb|CCD60442.1| serine/threonine kinase [Schistosoma mansoni]
	Treg_000181	225.6	139.1	190.4	343.4	95.9	137.3	139.3	112.4	-2.83	8.24e-33	gi|256079141|ref|XP_002575848.1| 5-aminolevulinic acid synthase [Schistosoma mansoni]gi|353230927|emb|CCD77344.1| 5-aminolevulinic acid synthase [Schistosoma mansoni]
	Treg_004009	758	681	584	878	505	561	572	502	-2.82	1.4e-40	gi|29841194|gb|AAP06207.1| SJCHGC06552 protein [Schistosoma japonicum]gi|226468600|emb|CAX69977.1| RAB39, member RAS oncogene family [Schistosoma japonicum]
	Treg_001447	651	636	466	876	253	323	314	282	-2.82	1.88e-33	gi|56758986|gb|AAW27633.1| SJCHGC07045 protein [Schistosoma japonicum]
	Treg_000377	2181.7	2429.9	1796.4	2367.6	1153.5	1554.2	1416.8	993.5	-2.82	1.23e-38	gi|360043371|emb|CCD78784.1| putative nucleosome assembly protein [Schistosoma mansoni]
	Treg_002106	77	20	47.2	48	26	27	23	18	-2.82	2.01e-11	gi|256085235|ref|XP_002578828.1| serine/threonine protein kinase [Schistosoma mansoni]gi|350644997|emb|CCD60280.1| serine/threonine kinase [Schistosoma mansoni]
	Treg_004490	29.5	12.7	13.1	18.1	18.4	9.8	0	8.2	-2.82	8.09e-07	gi|256084916|ref|XP_002578671.1| hypothetical protein [Schistosoma mansoni]gi|360042874|emb|CCD78284.1| hypothetical protein Smp_074950 [Schistosoma mansoni]
	Treg_005384	24.3	0	38	21.8	11.8	0	0	27.3	-2.82	0.00657	gi|256084436|ref|XP_002578435.1| monocarboxylate transporter [Schistosoma mansoni]gi|353230247|emb|CCD76418.1| putative monocarboxylate transporter [Schistosoma mansoni]
	Treg_000664	105.6	109.9	89.8	112.1	46.3	57.5	52.2	46.9	-2.81	1.36e-26	gi|256071065|ref|XP_002571862.1| hypothetical protein [Schistosoma mansoni]gi|353228576|emb|CCD74747.1| hypothetical protein Smp_004000 [Schistosoma mansoni]
	Treg_001046	473	577	375	729	260	339	356	294	-2.81	4.98e-26	gi|226469150|emb|CAX70054.1| putative cellular retinaldehyde-binding protein [Schistosoma japonicum]gi|226469152|emb|CAX70055.1| putative cellular retinaldehyde-binding protein [Schistosoma japonicum]gi|226469154|emb|CAX70056.1| putative cellular retinaldehyde-binding protein [Schistosoma japonicum]
	Treg_000011	35925.2	45097.9	23110.7	42171.2	13725.3	18496.1	19584.2	15889.7	-2.81	7.76e-27	gi|226469038|emb|CAX69998.1| hypothetical protein [Schistosoma japonicum]
	Treg_000916	582	736	425	708	374	403	425	317	-2.8	3.38e-22	gi|226480644|emb|CAX73419.1| Membrane-associated progesterone receptor component 2 [Schistosoma japonicum]
	Treg_000717	1601	869	986	1506	231	236	240	219	-2.8	6.02e-43	gi|56753129|gb|AAW24774.1| unknown [Schistosoma japonicum]
	Treg_002880	68	99	58	87	36	45	43	28	-2.8	7.71e-17	gi|358342188|dbj|GAA49711.1| tRNA(His) guanylyltransferase [Clonorchis sinensis]
	Treg_004417	54	62	38.9	87	25.6	34.3	25.7	28.3	-2.8	5.11e-17	gi|256082777|ref|XP_002577629.1| n-acetyltransferase mak3 [Schistosoma mansoni]gi|353230214|emb|CCD76385.1| putative n-acetyltransferase mak3 [Schistosoma mansoni]
	Treg_006204	6724	8911	4158	6839	2689	3323	3644	2504	-2.8	1.07e-31	gi|226474510|emb|CAX71741.1| putative 40S ribosomal protein S9 [Schistosoma japonicum]gi|226474512|emb|CAX71742.1| putative 40S ribosomal protein S9 [Schistosoma japonicum]gi|226475654|emb|CAX77876.1| putative 40S ribosomal protein S9 [Schistosoma japonicum]gi|226475660|emb|CAX77879.1| putative 40S ribosomal protein S9 [Schistosoma japonicum]gi|226475662|emb|CAX77880.1| putative 40S ribosomal pro…
	Treg_002639	20.4	16.2	14.1	31.3	14	8.6	8.8	7.1	-2.8	3.99e-12	gi|226467726|emb|CAX69739.1| Trafficking protein particle complex subunit 5 [Schistosoma japonicum]
	Treg_016163	455	293	333	457	186	252	274	190	-2.79	2.26e-43	gi|56759472|gb|AAW27876.1| SJCHGC02473 protein [Schistosoma japonicum]
	Treg_016004	1258	1033	1018	1583	453	599	565	504	-2.79	1.66e-39	gi|56755555|gb|AAW25956.1| SJCHGC06538 protein [Schistosoma japonicum]
	Treg_000943	586	130	452	492	59	75	77	85	-2.79	3.23e-27	gi|353229344|emb|CCD75515.1| serine/threonine protein kinase [Schistosoma mansoni]
	Treg_001356	42.6	10.8	23.1	38.5	25	0	0	22.9	-2.79	0.000861	gi|353228594|emb|CCD74765.1| putative ephrin receptor [Schistosoma mansoni]
	Treg_000360	616	569	493	786	293	329	349	266	-2.79	1.86e-31	gi|256088670|ref|XP_002580450.1| 30S ribosomal protein S12 [Schistosoma mansoni]gi|360045226|emb|CCD82774.1| putative 30s ribosomal protein S12 [Schistosoma mansoni]
	Treg_000599	119	126	78	117	48	60	62	53	-2.79	3.92e-22	gi|256087610|ref|XP_002579959.1| hypothetical protein [Schistosoma mansoni]gi|353229281|emb|CCD75452.1| hypothetical protein Smp_089220 [Schistosoma mansoni]
	Treg_010424	742.9	701.7	515.1	1003.9	424.6	488.6	497	415.1	-2.79	2.32e-33	gi|256081707|ref|XP_002577109.1| monoxygenase [Schistosoma mansoni]gi|360044686|emb|CCD82234.1| putative monoxygenase [Schistosoma mansoni]
	Treg_001216	1292	1370	720	1338	656	824	847	654	-2.79	2.69e-28	gi|256081209|ref|XP_002576865.1| chmp1 (chromatin modifying protein) (charged multivesicular body protein) [Schistosoma mansoni]
	Treg_001258	472.9	193.2	320.1	650.9	195	173.2	182	199.1	-2.79	1.21e-21	gi|256079265|ref|XP_002575909.1| histidine acid phosphatase [Schistosoma mansoni]gi|360044860|emb|CCD82408.1| putative histidine acid phosphatase [Schistosoma mansoni]
	Treg_000654	1347.9	1189.9	1032.7	1331.9	687.7	779.4	1007	623.3	-2.79	4.16e-35	gi|256075919|ref|XP_002574263.1| hypothetical protein [Schistosoma mansoni]gi|353229526|emb|CCD75697.1| hypothetical protein Smp_028170.1 [Schistosoma mansoni]
	Treg_006277	1299	1530	1000	1414	660	788	881	707	-2.78	1.8e-34	gi|56753866|gb|AAW25130.1| SJCHGC02831 protein [Schistosoma japonicum]gi|226469092|emb|CAX70025.1| eukaryotic translation initiation factor 3, subunit 2 (beta) [Schistosoma japonicum]gi|226486436|emb|CAX74347.1| eukaryotic translation initiation factor 3, subunit 2 (beta) [Schistosoma japonicum]gi|226486438|emb|CAX74348.1| eukaryotic translation initiation factor 3, subunit 2 (beta) [Schistosoma …
	Treg_016531	237	227	146	240	100	141	144	104	-2.78	2.05e-28	gi|353229072|emb|CCD75243.1| putative poly(p)/ATP NAD kinase [Schistosoma mansoni]
	Treg_001966	171	97	135	163	28	44	39	28	-2.78	1.9e-41	gi|256086800|ref|XP_002579575.1| hypothetical protein [Schistosoma mansoni]gi|360045113|emb|CCD82661.1| hypothetical protein Smp_168140 [Schistosoma mansoni]
	Treg_005577	15.1	10.3	54.5	31.8	0	14.3	0	32.1	-2.78	0.00116	gi|256080013|ref|XP_002576278.1| metastasis-associated protein 1 (mta1) [Schistosoma mansoni]
	Treg_016743	750.6	459.9	475	930.5	296.8	420	361	340.3	-2.78	1.93e-38	gi|256074673|ref|XP_002573648.1| ribose-phosphate pyrophosphokinase 1 [Schistosoma mansoni]gi|353230656|emb|CCD77073.1| putative ribose-phosphate pyrophosphokinase 1 [Schistosoma mansoni]
	Treg_002555	63	72	59	79	28	38	39	27	-2.77	6.05e-17	gi|56754849|gb|AAW25607.1| SJCHGC06118 protein [Schistosoma japonicum]gi|226471392|emb|CAX70777.1| proteasome (prosome, macropain) subunit, beta type, 7 [Schistosoma japonicum]gi|226489366|emb|CAX75827.1| proteasome (prosome, macropain) subunit, beta type, 7 [Schistosoma japonicum]gi|226489368|emb|CAX75828.1| proteasome (prosome, macropain) subunit, beta type, 7 [Schistosoma japonicum]gi|22648937…
	Treg_004018	590.6	99.7	777.8	560.1	320.6	564.9	249.5	382	-2.77	6.52e-08	gi|353233200|emb|CCD80555.1| hypothetical protein Smp_036760 [Schistosoma mansoni]
	Treg_017120	58.3	66.8	80.6	68.6	43.3	41	47.6	20.1	-2.77	1.51e-14	gi|256083533|ref|XP_002577997.1| hypothetical protein [Schistosoma mansoni]gi|353231662|emb|CCD79017.1| hypothetical protein Smp_158900 [Schistosoma mansoni]
	Treg_004100	568	163	396	453	132	131	192	177	-2.76	1.63e-23	gi|256087538|ref|XP_002579924.1| serine/threonine protein kinase [Schistosoma mansoni]gi|353230324|emb|CCD76495.1| serine/threonine kinase [Schistosoma mansoni]
	Treg_017200	1117.9	672	775.1	1241	166.5	204.3	199.3	151.9	-2.76	5.45e-41	gi|353232789|emb|CCD80145.1| hypothetical protein Smp_156850 [Schistosoma mansoni]
	Treg_005709	2680.3	485.4	3603.9	2295.6	936.7	1318.3	1107.6	1069.7	-2.76	2.11e-11	gi|350644753|emb|CCD60548.1| serine/threonine kinase [Schistosoma mansoni]
	Treg_003717	11199	8053	6817	11308	3310	3518	4371	3584	-2.76	2.28e-32	gi|256083119|ref|XP_002577797.1| calpain (C02 family) [Schistosoma mansoni]gi|353230291|emb|CCD76462.1| calpain (C02 family) [Schistosoma mansoni]
	Treg_000200	1687	1659	1103	1814	714	817	925	738	-2.76	3.53e-34	gi|256074503|ref|XP_002573564.1| hypothetical protein [Schistosoma mansoni]
	Treg_011307	66.8	106.1	52.4	85.9	42.5	32.9	40.8	36.4	-2.76	2.22e-13	gi|256053053|ref|XP_002570025.1| hypothetical protein [Schistosoma mansoni]gi|350644562|emb|CCD60725.1| hypothetical protein Smp_093800 [Schistosoma mansoni]
	Treg_000967	2177	2159	1690	3323	1241	1564	1479	1257	-2.75	3.09e-37	gi|256079440|ref|XP_002575995.1| dihydrolipoamide dehydrogenase [Schistosoma mansoni]gi|353231245|emb|CCD77663.1| dihydrolipoamide dehydrogenase [Schistosoma mansoni]
	Treg_005232	22	4	14	14	5	15	9	5	-2.75	6.41e-08	NO HIT
	Treg_008169	3012	2379	1783	3003	1048	975	1221	996	-2.75	1.14e-29	gi|226479072|emb|CAX73031.1| Epidermal growth factor receptor pathway substrate 8 [Schistosoma japonicum]
	Treg_000405	5888	2334	4845	5873	1413	1705	1493	1562	-2.74	6.9e-35	gi|56759114|gb|AAW27697.1| SJCHGC05190 protein [Schistosoma japonicum]
	Treg_005166	6	19	14	9	1	1	0	7	-2.74	3.08e-05	gi|256081475|ref|XP_002576995.1| glyceraldehyde-3-phosphate dehydrogenase (phosphorylating) [Schistosoma mansoni]gi|353229456|emb|CCD75627.1| glyceraldehyde-3-phosphate dehydrogenase (phosphorylating) [Schistosoma mansoni]
	Treg_008493	1647	1302	972	1832	489	623	602	553	-2.74	1.05e-36	gi|256073646|ref|XP_002573140.1| heme binding protein [Schistosoma mansoni]gi|353233418|emb|CCD80773.1| putative heme binding protein [Schistosoma mansoni]
	Treg_002521	19	6	73	24	17	14	11	20	-2.73	1.87e-05	gi|256077659|ref|XP_002575119.1| hypothetical protein [Schistosoma mansoni]gi|353230694|emb|CCD77111.1| hypothetical protein Smp_037610 [Schistosoma mansoni]
	Treg_000461	925	332	720	729	263	230	351	302	-2.73	1.22e-25	gi|556518394|emb|CDJ21659.1| phospholipid translocating ATPase [Echinococcus granulosus]
	Treg_000359	1865	2197	988	1942	1149	1280	1630	901	-2.73	1.14e-17	gi|256052026|ref|XP_002569580.1| hypothetical protein [Schistosoma mansoni]gi|350646172|emb|CCD59156.1| hypothetical protein Smp_017450 [Schistosoma mansoni]
	Treg_015074	1030.6	1386.5	901.1	1287	614.4	698.7	845.8	603.7	-2.72	3.8e-32	gi|256073181|ref|XP_002572910.1| enhancer of polycomb [Schistosoma mansoni]gi|350645702|emb|CCD59677.1| enhancer of polycomb, putative [Schistosoma mansoni]
	Treg_001585	173.7	244.6	173.6	294.6	92.9	116	113	102.3	-2.72	1.53e-27	gi|256072351|ref|XP_002572499.1| hypothetical protein [Schistosoma mansoni]gi|353233548|emb|CCD80902.1| hypothetical protein Smp_010380 [Schistosoma mansoni]
	Treg_008133	165	179	117	204	70	101	71	58	-2.72	2.71e-27	gi|226489955|emb|CAX75128.1| purine-nucleoside phosphorylase [Schistosoma japonicum]
	Treg_008657	1351	796	1054	1497	378	511	545.1	458.1	-2.72	4.28e-42	gi|226483609|emb|CAX74105.1| hypothetical protein [Schistosoma japonicum]
	Treg_000315	73	38.9	30	41	11	9	19	12	-2.71	9.3e-19	NO HIT
	Treg_000926	452	405	325	452	239	278	287	221	-2.71	4.47e-41	gi|256074477|ref|XP_002573551.1| GTP-binding protein-animal [Schistosoma mansoni]gi|353231524|emb|CCD77942.1| putative gtp-binding protein-animal [Schistosoma mansoni]
	Treg_002354	28.2	19.9	30.2	27.1	10.1	19.2	14	10.9	-2.71	1.11e-11	gi|256072619|ref|XP_002572632.1| CD36-like class B scavenger receptor [Schistosoma mansoni]
	Treg_000983	1133	1669	1139	1514	375	444	435	358	-2.71	2.15e-38	gi|226468796|emb|CAX76426.1| DEAD (Asp-Glu-Ala-Asp) box polypeptide 50 [Schistosoma japonicum]gi|226468798|emb|CAX76427.1| DEAD (Asp-Glu-Ala-Asp) box polypeptide 50 [Schistosoma japonicum]
	Treg_005835	35.2	8.2	33.7	25.9	8.5	10.4	9.3	10.2	-2.7	3.94e-09	NO HIT
	Treg_001341	1064	999	685	1418	608	736	755	644	-2.7	2.2e-32	gi|387912858|sp|C4QCD2.2|PURA_SCHMA RecName: Full=Adenylosuccinate synthetase; Short=AMPSase; Short=AdSS; AltName: Full=IMP--aspartate ligasegi|353230435|emb|CCD76606.1| adenylosuccinate synthetase [Schistosoma mansoni]
	Treg_001241	380.4	92.8	217.2	374.8	55.5	70.2	50.2	49.9	-2.7	3.94e-26	gi|256080612|ref|XP_002576573.1| heat shock protein 70 [Schistosoma mansoni]
	Treg_007125	1422	1679	1032	1886	814	997	1134	771	-2.7	4.67e-31	gi|256074852|ref|XP_002573736.1| hypothetical protein [Schistosoma mansoni]gi|353233696|emb|CCD81050.1| hypothetical protein Smp_134510 [Schistosoma mansoni]
	Treg_004183	238	254	246	303	165	239	208	162	-2.7	6.14e-36	gi|226481643|emb|CAX73719.1| Nucleolar protein 12 [Schistosoma japonicum]
	Treg_000253	673.2	334	576.1	882.9	209.3	338.4	271.2	302.6	-2.7	4.3e-29	gi|226479024|emb|CAX73007.1| Calcium ATPase at 60A [Schistosoma japonicum]
	Treg_000324	1107	1305	854	1231	330	321	398	284	-2.69	8.25e-38	gi|256085813|ref|XP_002579106.1| tubulin subunit beta [Schistosoma mansoni]gi|360044423|emb|CCD81971.1| putative tubulin beta chain [Schistosoma mansoni]
	Treg_009971	363	404	298	372	71	93	78	77	-2.69	5.94e-31	gi|29840884|gb|AAP05885.1| hypothetical protein [Schistosoma japonicum]
	Treg_000542	445.7	459.7	250.7	463.3	207.9	238.4	331.7	268.6	-2.69	4.51e-25	gi|256086782|ref|XP_002579567.1| long-chain-fatty-acid--CoA ligase [Schistosoma mansoni]
	Treg_004165	809.9	869.4	636.1	902.1	444.3	562	509.5	452.4	-2.69	1.28e-27	gi|256074637|ref|XP_002573630.1| zinc finger protein [Schistosoma mansoni]
	Treg_000550	697	912	564	795	560	615	704	529	-2.68	1.06e-23	gi|226486928|emb|CAX74541.1| Bcl2-associated athanogene 1 [Schistosoma japonicum]
	Treg_000947	780.8	533	602.8	864	122.1	198.5	140.3	129.3	-2.68	7.38e-37	gi|353229434|emb|CCD75605.1| hypothetical protein Smp_173630 [Schistosoma mansoni]
	Treg_002903	30	10	6	11	2	4	7	4	-2.68	2.32e-09	NO HIT
	Treg_004236	30.1	18.9	36.5	29.4	23.4	0	15.3	26.1	-2.68	1.99e-06	gi|425474|gb|AAA66476.1| SMDR1 [Schistosoma mansoni]
	Treg_004629	20	1.7	24	24	0	3	4.8	3	-2.68	9.22e-06	NO HIT
	Treg_008041	616	506	384	683	210	287	286	273	-2.68	5.38e-32	gi|56759344|gb|AAW27812.1| SJCHGC05885 protein [Schistosoma japonicum]
	Treg_016164	130.4	105.8	78	134.6	56	83.9	75	51.8	-2.68	1.49e-23	gi|32187009|gb|AAP73467.1| neuronal nitric oxidse synthase protein inhibitor [Schistosoma japonicum]gi|226478632|emb|CAX72811.1| adenosinetriphosphatase [Schistosoma japonicum]
	Treg_001458	310	437	267	361	163	171	203	161	-2.68	1.6e-29	gi|256086014|ref|XP_002579202.1| nucleotide-binding protein 1 (nbp 1)/nbp35 [Schistosoma mansoni]
	Treg_008486	6114.2	4779.4	3951.7	6875.5	2004.9	2506.3	2393.7	2190	-2.68	1.01e-35	gi|256079086|ref|XP_002575821.1| 2-oxoglutarate dehydrogenase [Schistosoma mansoni]gi|360045206|emb|CCD82754.1| 2-oxoglutarate dehydrogenase [Schistosoma mansoni]
	Treg_007801	2117	1351	1390	2381	866	933	1015	909	-2.68	3.47e-37	gi|256052074|ref|XP_002569604.1| hypothetical protein [Schistosoma mansoni]gi|360043688|emb|CCD81234.1| putative rab-interacting protein [Schistosoma mansoni]
	Treg_007810	8773.9	11250.9	5867	9223	4318.9	4798.9	5292	3658	-2.68	2.27e-34	gi|226475968|emb|CAX72074.1| 60S ribosomal protein L8 [Schistosoma japonicum]
	Treg_000939	196	190	123	194	100	120	101	109	-2.67	8.49e-26	gi|256089441|ref|XP_002580818.1| hypothetical protein [Schistosoma mansoni]gi|360043521|emb|CCD78934.1| hypothetical protein Smp_100070 [Schistosoma mansoni]
	Treg_015619	1121	1248.3	738	1142.6	765.7	883.6	764.5	776.9	-2.67	9.54e-29	NO HIT
	Treg_001426	1106	1033	772	1342	681	805	748	732	-2.67	1.29e-34	gi|256082870|ref|XP_002577675.1| cell polarity protein; protein kinase; regulator of photoreceptor cell morphogenesis [Schistosoma mansoni]gi|353231927|emb|CCD79282.1| cell polarity protein [Schistosoma mansoni]
	Treg_004504	88	51.2	51.7	90.1	36.3	28	35.8	34.3	-2.67	4.59e-21	gi|256072781|ref|XP_002572712.1| lysyl oxidase-like [Schistosoma mansoni]
	Treg_013768	31	40	35	39	14	35	19	22	-2.66	5.58e-11	gi|358341095|dbj|GAA48856.1| enoyl-CoA hydratase, partial [Clonorchis sinensis]
	Treg_018338	35.7	10.6	27.7	40.1	11.2	13.8	7.8	15	-2.66	3.83e-08	gi|256077173|ref|XP_002574882.1| hypothetical protein [Schistosoma mansoni]gi|353230769|emb|CCD77186.1| hypothetical protein Smp_140710 [Schistosoma mansoni]
	Treg_000294	1829	1279	1436	1783	349	346	355	323	-2.66	6.19e-38	gi|256075343|ref|XP_002573979.1| calmodulin [Schistosoma mansoni]gi|360044817|emb|CCD82365.1| similar to 16 kDa calcium-binding protein [Schistosoma mansoni]
	Treg_002182	25	21	15	33	5	6	8	9	-2.65	2.07e-17	gi|226482444|emb|CAX73821.1| hypotheticial protein [Schistosoma japonicum]
	Treg_003765	375	448	253	421	221	252	276	226	-2.65	1.2e-22	gi|56758222|gb|AAW27251.1| SJCHGC05918 protein [Schistosoma japonicum]
	Treg_000723	1648	1376	937	1834	298	341	380	283	-2.65	2.61e-28	gi|256088565|ref|XP_002580401.1| inositol monophosphatase [Schistosoma mansoni]gi|360044206|emb|CCD81753.1| inositol monophosphatase [Schistosoma mansoni]
	Treg_004096	90.7	42.8	77.6	109.9	41	46.1	40.4	55.7	-2.65	3.36e-17	gi|256077826|ref|XP_002575201.1| cullin [Schistosoma mansoni]gi|360043647|emb|CCD81193.1| putative cullin [Schistosoma mansoni]
	Treg_001855	127	156	126	146	82	105	102	57	-2.64	1.65e-20	gi|256087030|ref|XP_002579682.1| mitochondria associated granulocyte macrophage csf signaling molecule [Schistosoma mansoni]gi|360043128|emb|CCD78540.1| putative mitochondria associated granulocyte macrophage csf signaling molecule [Schistosoma mansoni]
	Treg_005578	8.3	0	28.7	16.4	2	3	3	0	-2.64	0.00124	NO HIT
	Treg_000226	264.9	302.3	212.6	286.3	171.3	212.3	210.4	140.6	-2.64	6.97e-30	gi|76155267|gb|AAX26526.2| SJCHGC09040 protein [Schistosoma japonicum]
	Treg_001252	1086	1164	795	1465	664	887	852	716	-2.64	2.38e-33	gi|56757195|gb|AAW26769.1| SJCHGC09380 protein [Schistosoma japonicum]
	Treg_008577	501	524	347	612	330	436	493	295	-2.64	1.07e-22	gi|256086766|ref|XP_002579560.1| hypothetical protein [Schistosoma mansoni]gi|353229573|emb|CCD75744.1| hypothetical protein Smp_084620 [Schistosoma mansoni]
	Treg_016019	1826.6	2574	1551	2625	884.5	939.4	1066.5	803.4	-2.64	3.74e-23	gi|226468182|emb|CAX76318.1| hypothetical protein [Schistosoma japonicum]gi|226468184|emb|CAX76319.1| hypothetical protein [Schistosoma japonicum]gi|226468186|emb|CAX76320.1| hypothetical protein [Schistosoma japonicum]gi|226472656|emb|CAX71014.1| hypothetical protein [Schistosoma japonicum]gi|226482656|emb|CAX73927.1| hypothetical protein [Schistosoma japonicum]
	Treg_001647	625	584	584	843	341	388	385	345	-2.63	6.52e-31	gi|353231740|emb|CCD79095.1| elongation of fatty acids protein 1 [Schistosoma mansoni]
	Treg_000391	2891.4	562.6	13893.8	3683	1962.4	1955.2	2610.6	2667.8	-2.62	3.96e-06	NO HIT
	Treg_004588	92.8	73.2	70.3	79.8	33.6	31.1	57.4	32.3	-2.62	8.71e-17	NO HIT
	Treg_014808	116.8	127	65.2	137.7	58.7	71	63.7	50	-2.62	3.77e-21	gi|256082543|ref|XP_002577514.1| hypothetical protein [Schistosoma mansoni]gi|353232149|emb|CCD79504.1| hypothetical protein Smp_155770 [Schistosoma mansoni]
	Treg_001789	5.6	11.5	4.1	4.3	0	6.8	1.1	1	-2.62	0.000104	gi|60692640|gb|AAX30638.1| SJCHGC06306 protein [Schistosoma japonicum]gi|226485693|emb|CAX75266.1| putative small nuclear ribonucleoprotein G [Schistosoma japonicum]gi|226485695|emb|CAX75267.1| putative small nuclear ribonucleoprotein G [Schistosoma japonicum]gi|226485697|emb|CAX75268.1| putative small nuclear ribonucleoprotein G [Schistosoma japonicum]
	Treg_009632	805	655	628	880	307	347	377	323	-2.62	1.08e-35	gi|56758178|gb|AAW27229.1| SJCHGC05511 protein [Schistosoma japonicum]gi|226466852|emb|CAX69561.1| Ras-related protein Rab-11A [Schistosoma japonicum]
	Treg_001251	58.9	41.5	23.2	57.3	17.4	34	44.8	15.5	-2.62	3.88e-10	gi|353228492|emb|CCD74663.1| hypothetical protein Smp_171090.1 [Schistosoma mansoni]
	Treg_010823	200	180	128	247	80	120	104	81	-2.61	2.44e-29	gi|256085197|ref|XP_002578809.1| Universal stress protein G [Schistosoma mansoni]gi|350645018|emb|CCD60301.1| Universal stress protein G, putative [Schistosoma mansoni]
	Treg_012913	17	34	30	40	13	22	19	23	-2.61	2.85e-10	NO HIT
	Treg_015206	2196	1900	1874	3135	1377	1533	1567	1452	-2.61	1e-37	gi|256053157|ref|XP_002570071.1| starch branching enzyme II [Schistosoma mansoni]gi|353229073|emb|CCD75244.1| putative starch branching enzyme II [Schistosoma mansoni]
	Treg_006998	5664.9	5602.4	4691.9	6766.1	2680.2	3400.8	3269.1	2930.8	-2.61	9.19e-40	gi|56756146|gb|AAW26251.1| SJCHGC06778 protein [Schistosoma japonicum]
	Treg_000382	4276	1870	2793	3004	1180	1365	1294	1185	-2.61	1.33e-36	gi|360045517|emb|CCD83065.1| hypothetical protein Smp_068500 [Schistosoma mansoni]
	Treg_018811	85	74	60	84	40	37	50	31	-2.61	1.89e-21	gi|256071935|ref|XP_002572293.1| hypothetical protein [Schistosoma mansoni]gi|353229810|emb|CCD75981.1| hypothetical protein Smp_008140.1 [Schistosoma mansoni]
	Treg_001567	289	416	199	385	173	204	211	178	-2.6	1e-20	gi|256079122|ref|XP_002575839.1| hypothetical protein [Schistosoma mansoni]
	Treg_004237	238	130	156	247	76	109	110	100	-2.6	2.26e-36	gi|256075389|ref|XP_002574002.1| hypothetical protein [Schistosoma mansoni]gi|353229373|emb|CCD75544.1| putative leucine rich repeat-containing [Schistosoma mansoni]
	Treg_005417	9.7	12.3	31.9	35.7	10.6	24.1	14.4	0	-2.6	3.63e-05	gi|76154339|gb|AAX25827.2| SJCHGC09098 protein [Schistosoma japonicum]
	Treg_006718	700	888	643	899	407	540	544	452	-2.6	5.71e-33	gi|226470426|emb|CAX70493.1| hypothetical protein [Schistosoma japonicum]
	Treg_006526	127.4	161	103.3	133.4	80.6	90.3	75.6	71.9	-2.6	1.25e-21	gi|76152735|gb|AAX24415.2| SJCHGC07070 protein [Schistosoma japonicum]
	Treg_000427	130.4	32.7	94.4	134.1	54.4	79.8	38.4	51.4	-2.59	4.08e-10	gi|256071134|ref|XP_002571896.1| hypothetical protein [Schistosoma mansoni]gi|350645645|emb|CCD59620.1| hypothetical protein Smp_004360.1 [Schistosoma mansoni]
	Treg_001165	3839	4045	2825	4593	1450	1685	1682	1425	-2.59	4.11e-31	gi|56435063|gb|AAV91323.1| succinate dehydrogenase iron-sulfur protein [Schistosoma japonicum]gi|56757549|gb|AAW26938.1| SJCHGC06829 protein [Schistosoma japonicum]gi|226470530|emb|CAX70545.1| succinate dehydrogenase complex, subunit B, iron sulfur [Schistosoma japonicum]gi|226470532|emb|CAX70546.1| succinate dehydrogenase complex, subunit B, iron sulfur [Schistosoma japonicum]gi|226470534|emb|CA…
	Treg_015337	269.7	51	455.3	232.2	31.2	53.8	47	43	-2.59	6.89e-12	gi|76155286|gb|AAX26546.2| SJCHGC03872 protein [Schistosoma japonicum]
	Treg_010800	222	221.7	177.9	217.2	96.7	113.1	122.1	78.5	-2.59	1.4e-29	gi|256088596|ref|XP_002580415.1| hydroxymethylbilane synthase; porphobilinogen deaminase [Schistosoma mansoni]gi|360044143|emb|CCD81690.1| putative porphobilinogen deaminase [Schistosoma mansoni]
	Treg_001449	274	261.6	190.3	260.9	136.5	180.8	215.7	160.1	-2.59	2.78e-30	gi|256074202|ref|XP_002573415.1| hypothetical protein [Schistosoma mansoni]gi|350855081|emb|CCD58189.1| hypothetical protein Smp_019680.1 [Schistosoma mansoni]
	Treg_007247	5334	5132	3566	6207	1856	1956	2190	1646	-2.59	5.55e-30	gi|256071063|ref|XP_002571861.1| triosephosphate isomerase [Schistosoma mansoni]gi|353228577|emb|CCD74748.1| putative triosephosphate isomerase [Schistosoma mansoni]
	Treg_017966	38	73	49	91	33	59	35	29	-2.58	7.85e-13	NO HIT
	Treg_004440	566	526	446	530	236	311	319	230	-2.58	4.38e-29	gi|256090766|ref|XP_002581352.1| SEL-1 like protein [Schistosoma mansoni]
	Treg_008254	6515	9097	4983	7087	3633	4665	4845	3460	-2.58	4.15e-31	gi|256080682|ref|XP_002576607.1| 40S ribosomal protein S6 [Schistosoma mansoni]gi|350645591|emb|CCD59716.1| 40S ribosomal protein S6, putative [Schistosoma mansoni]
	Treg_000998	824	892	662	1021	670	752	846	601	-2.57	5.26e-28	gi|226471352|emb|CAX70757.1| Lin-7 homolog B [Schistosoma japonicum]gi|226489320|emb|CAX75804.1| Lin-7 homolog B [Schistosoma japonicum]gi|226489322|emb|CAX75805.1| Lin-7 homolog B [Schistosoma japonicum]gi|226489324|emb|CAX75806.1| Lin-7 homolog B [Schistosoma japonicum]gi|226489326|emb|CAX75807.1| Lin-7 homolog B [Schistosoma japonicum]gi|226489328|emb|CAX75808.1| Lin-7 homolog B [Schistosoma j…
	Treg_001667	184.4	233.8	161.3	299.9	123	164.2	185.1	157.6	-2.57	6.9e-26	gi|256087863|ref|XP_002580082.1| hypothetical protein [Schistosoma mansoni]gi|360043708|emb|CCD81254.1| hypothetical protein Smp_171660 [Schistosoma mansoni]
	Treg_020335	2007.9	938.4	1286.6	1839.9	568.5	819.3	676.8	705.6	-2.57	5.55e-35	gi|29841008|gb|AAP06021.1| similar to XM_080170 misexpression suppressor of KSR 2 in Drosophila melanogaster [Schistosoma japonicum]
	Treg_013054	30	34	22	44	20	22	23	22	-2.57	1.35e-14	gi|256080680|ref|XP_002576606.1| S-adenosyl-methyltransferase mraW [Schistosoma mansoni]gi|350645592|emb|CCD59717.1| S-adenosyl-methyltransferase mraW, putative [Schistosoma mansoni]
	Treg_011776	218	115	149	181	82	95	90	81	-2.57	2.26e-38	gi|256073269|ref|XP_002572954.1| chl1 helicase homolog [Schistosoma mansoni]gi|353230973|emb|CCD77390.1| putative chl1 helicase homolog [Schistosoma mansoni]
	Treg_005043	104	135	90	126	71	94	81	85	-2.57	1.31e-17	gi|226488901|emb|CAX74800.1| Glycerophosphodiester phosphodiesterase domain-containing protein 1 [Schistosoma japonicum]
	Treg_015988	4649	7165	4351	6623	2816	3406	3686	2632	-2.56	3.12e-30	gi|226473736|emb|CAX71553.1| putative ribosomal protein L15 [Schistosoma japonicum]
	Treg_000038	888	1274	827	1197	707	802	858	693	-2.56	1.82e-25	gi|56754778|gb|AAW25574.1| SJCHGC06618 protein [Schistosoma japonicum]gi|226467796|emb|CAX69774.1| eukaryotic translation initiation factor 3, subunit 4 delta [Schistosoma japonicum]gi|226482416|emb|CAX73807.1| eukaryotic translation initiation factor 3, subunit 4 delta [Schistosoma japonicum]
	Treg_004286	488.8	484.9	368.8	700.7	338.9	459.5	497.2	385.9	-2.56	4.71e-26	gi|556517295|emb|CDJ20546.1| major facilitator superfamily domain containing protein [Echinococcus granulosus]
	Treg_002300	157	174	101	134	85	89	92	78	-2.56	8.9e-20	gi|256080048|ref|XP_002576295.1| hypothetical protein [Schistosoma mansoni]gi|350646042|emb|CCD59319.1| WD-repeat protein, putative [Schistosoma mansoni]
	Treg_006775	1173	1815	992	1595	609	652	844	607	-2.55	9.74e-17	gi|256084811|ref|XP_002578619.1| tegumental protein [Schistosoma mansoni]gi|360045149|emb|CCD82697.1| putative tegumental protein [Schistosoma mansoni]gi|390124514|emb|CCE94318.1| tegumental antigen [Schistosoma mansoni]
	Treg_009462	26.8	33	26.2	42.9	16.5	21.9	28.6	19.9	-2.55	1.15e-13	gi|360042868|emb|CCD78278.1| putative glutamine-dependent NAD(+) synthetase [Schistosoma mansoni]
	Treg_001486	382.3	456.8	327.6	511.1	289.6	309.8	313.3	260.5	-2.55	7.55e-26	gi|76157723|gb|AAX28562.2| SJCHGC06086 protein [Schistosoma japonicum]
	Treg_000571	31.9	21.7	23.4	33	13.9	21.4	9.2	14	-2.55	5.67e-11	gi|256079917|ref|XP_002576230.1| heat shock protein 16 [Schistosoma mansoni]gi|353230033|emb|CCD76204.1| putative heat shock protein hsp16 [Schistosoma mansoni]
	Treg_013220	29	9	42	35	11	18	15	19	-2.55	1.43e-08	gi|256072264|ref|XP_002572456.1| hypothetical protein [Schistosoma mansoni]
	Treg_000569	4487	2738	3232	4789	1536	1794	1648	1410	-2.54	1.44e-34	gi|256087290|ref|XP_002579805.1| fascin [Schistosoma mansoni]gi|238665292|emb|CAZ36044.1| fascin, putative [Schistosoma mansoni]
	Treg_000613	373.6	391.7	300.7	403.1	247.8	288.8	273.5	219.7	-2.54	4.23e-34	NO HIT
	Treg_001343	1505	600	1227	1681	707	761	656	750	-2.54	7.23e-29	gi|353229163|emb|CCD75334.1| putative ank repeat-containing [Schistosoma mansoni]
	Treg_000825	614.3	416	476.4	782.8	226.9	429.2	336	251.8	-2.54	4.14e-29	gi|350645662|emb|CCD59637.1| calpain-7 (C02 family) [Schistosoma mansoni]
	Treg_003920	37.3	0	33.9	60.6	1.5	13.8	0	4.4	-2.54	0.0054	gi|256071751|ref|XP_002572202.1| sr-related ctd associated factor [Schistosoma mansoni]gi|353229413|emb|CCD75584.1| sr-related ctd associated factor [Schistosoma mansoni]
	Treg_000715	872	502	644	854	296	374	337	386	-2.54	1.7e-37	gi|256070854|ref|XP_002571757.1| hypothetical protein [Schistosoma mansoni]gi|353232987|emb|CCD80342.1| putative anoctamin [Schistosoma mansoni]
	Treg_002702	6.7	29.9	12.7	28.9	10.8	5.1	15.8	23.3	-2.53	0.000177	gi|56756765|gb|AAW26554.1| SJCHGC01037 protein [Schistosoma japonicum]
	Treg_015131	798.3	898.9	507.2	882.1	475.1	604.8	481.3	495.7	-2.53	3.07e-20	gi|256087495|ref|XP_002579904.1| hypothetical protein [Schistosoma mansoni]gi|353230573|emb|CCD76990.1| hypothetical protein Smp_088720 [Schistosoma mansoni]
	Treg_002017	326	340	274	392	222	322	295	254	-2.53	4.78e-29	gi|256085250|ref|XP_002578835.1| nonsense-mediated mRNA decay protein [Schistosoma mansoni]gi|353228761|emb|CCD74932.1| putative nonsense-mediated mRNA decay protein [Schistosoma mansoni]
	Treg_017170	969	1138	861	1185	745	878	835	652	-2.53	7.61e-30	gi|256080758|ref|XP_002576644.1| aspartyl-tRNA synthetase [Schistosoma mansoni]gi|353232057|emb|CCD79412.1| putative aspartyl-tRNA synthetase [Schistosoma mansoni]
	Treg_000357	500	613	391	529	405	457	479	394	-2.52	2.76e-20	gi|56757605|gb|AAW26960.1| SJCHGC01927 protein [Schistosoma japonicum]gi|226487388|emb|CAX74564.1| Pre-mRNA-splicing factor syf2 [Schistosoma japonicum]
	Treg_006836	3672	5063	2485	5261	2084	2702	2695	2045	-2.52	4.52e-21	gi|256074592|ref|XP_002573608.1| hypothetical protein [Schistosoma mansoni]gi|238658791|emb|CAZ29840.1| hypothetical protein Smp_021730.2 [Schistosoma mansoni]
	Treg_010358	275.9	202.6	121.7	312.8	122.7	162.6	137.4	177.3	-2.52	4.56e-21	gi|256077076|ref|XP_002574834.1| hypothetical protein [Schistosoma mansoni]gi|350646483|emb|CCD58882.1| hypothetical protein Smp_033870 [Schistosoma mansoni]
	Treg_015993	618.5	574.9	453.2	661.2	488.6	508.9	520.4	468.1	-2.52	2.18e-30	gi|256076873|ref|XP_002574733.1| hypothetical protein [Schistosoma mansoni]
	Treg_000090	1622.6	1057	1202.9	1727.7	315	349.1	380.7	317.2	-2.51	3.04e-36	gi|56754921|gb|AAW25643.1| SJCHGC06025 protein [Schistosoma japonicum]
	Treg_000770	1840	2469	1499	2413	1644	1960	2118	1637	-2.51	2.74e-16	gi|56753179|gb|AAW24799.1| SJCHGC00720 protein [Schistosoma japonicum]gi|226468708|emb|CAX76382.1| Ubiquitin-conjugating enzyme E2 [Schistosoma japonicum]gi|226472762|emb|CAX71067.1| Ubiquitin-conjugating enzyme E2 [Schistosoma japonicum]
	Treg_001944	161	165	138	181	87	136	127	87	-2.51	2.96e-24	gi|353233317|emb|CCD80672.1| hypothetical protein Smp_156240 [Schistosoma mansoni]
	Treg_001324	458.7	656.9	368.9	631.9	403.9	373.9	396.7	338.9	-2.51	8.75e-16	gi|256089170|ref|XP_002580688.1| nucleolar protein family A member [Schistosoma mansoni]gi|353228995|emb|CCD75166.1| putative nucleolar protein family A member [Schistosoma mansoni]
	Treg_001511	311	388	313	447	207	293	272	160	-2.51	4.8e-25	gi|256076240|ref|XP_002574421.1| hypothetical protein [Schistosoma mansoni]gi|360043273|emb|CCD78686.1| hypothetical protein Smp_029750 [Schistosoma mansoni]
	Treg_003009	20	4	42	32	10	18	12	14	-2.51	1.83e-05	gi|256071394|ref|XP_002572025.1| peptidase [Schistosoma mansoni]gi|350645040|emb|CCD60270.1| Mername-AA217 hypothetical peptidase (M14 family) [Schistosoma mansoni]
	Treg_006364	5041	4593	3422	6128	1746	2029	2070	1814	-2.51	3.43e-30	gi|226473266|emb|CAX71319.1| Receptor expression-enhancing protein 5 [Schistosoma japonicum]
	Treg_000541	21.3	6.7	14.5	25.7	6.8	17	5	9.4	-2.5	2.67e-06	gi|256086782|ref|XP_002579567.1| long-chain-fatty-acid--CoA ligase [Schistosoma mansoni]
	Treg_000505	58	77	574	175	36	46	26	65	-2.5	1.46e-07	gi|256067795|ref|XP_002570622.1| subfamily M23B non-peptidase homologue (M23 family) [Schistosoma mansoni]
	Treg_000278	63.4	72.7	38	64.2	1.6	14	9.3	15.6	-2.5	9.7e-12	gi|129359|sp|P12812.1|P40_SCHMA RecName: Full=Major egg antigen; AltName: Full=p40
	Treg_000612	592	559	413	729	393	415	444	366	-2.49	4.33e-28	gi|256077635|ref|XP_002575107.1| bhlhzip transcription factor bigmax [Schistosoma mansoni]gi|353230681|emb|CCD77098.1| putative bhlhzip transcription factor bigmax [Schistosoma mansoni]
	Treg_001501	1747	946	1328	1766	783	953	900	804	-2.49	8.29e-37	gi|256083178|ref|XP_002577826.1| hypothetical protein [Schistosoma mansoni]gi|360044789|emb|CCD82337.1| hypothetical protein Smp_157670 [Schistosoma mansoni]
	Treg_009240	436	333	327	435	266	312	279	235	-2.49	1.9e-37	gi|256080379|ref|XP_002576459.1| heterogeneous nuclear ribonucleoprotein [Schistosoma mansoni]
	Treg_005474	18.3	2.2	5.7	19.6	9.2	7.5	5.7	9.4	-2.49	6.77e-06	gi|256077175|ref|XP_002574883.1| hypothetical protein [Schistosoma mansoni]gi|353230770|emb|CCD77187.1| hypothetical protein Smp_034300 [Schistosoma mansoni]
	Treg_016639	1130	842	672	1444	486	595	575	523	-2.48	2.6e-28	gi|56752765|gb|AAW24594.1| SJCHGC06743 protein [Schistosoma japonicum]
	Treg_001087	544	135	440	411	181	203	178	195	-2.48	3.84e-18	gi|360045011|emb|CCD82559.1| putative forkhead protein/ forkhead protein domain [Schistosoma mansoni]
	Treg_006778	3655	5436	3105	4774	2093	2762	2601	1914	-2.48	2.78e-29	gi|256077837|ref|XP_002575206.1| 60S ribosomal protein L6 [Schistosoma mansoni]gi|360044481|emb|CCD82029.1| putative 60s ribosomal protein L6 [Schistosoma mansoni]
	Treg_015740	539.7	606.8	450.1	649.2	292.9	335.1	408.1	343	-2.48	7.84e-19	gi|256072021|ref|XP_002572336.1| hypothetical protein [Schistosoma mansoni]
	Treg_003655	8770	11374	7142	9939	5272	6583	6549	4827	-2.48	1.72e-33	gi|226469644|emb|CAX76652.1| deoxyribonuclease [Schistosoma japonicum]gi|226469648|emb|CAX76654.1| deoxyribonuclease [Schistosoma japonicum]gi|226469650|emb|CAX76655.1| deoxyribonuclease [Schistosoma japonicum]gi|226472992|emb|CAX71182.1| deoxyribonuclease [Schistosoma japonicum]gi|226472994|emb|CAX71183.1| deoxyribonuclease [Schistosoma japonicum]
	Treg_000525	1922	496	4671	1828	1855	2565	1826	2203	-2.47	1.17e-05	gi|350644779|emb|CCD60486.1| titin, putative [Schistosoma mansoni]
	Treg_000199	1977	3093	1966	2552	1478	1965	2053	1424	-2.47	2.13e-27	gi|256089844|ref|XP_002580962.1| 60S ribosomal protein L7 [Schistosoma mansoni]gi|238666689|emb|CAZ37201.1| 60S ribosomal protein L7, putative [Schistosoma mansoni]
	Treg_014452	4127	5974	2524	4308	2122	2484	2935	1823	-2.47	1.71e-20	gi|256084813|ref|XP_002578620.1| 30S ribosomal protein S12 [Schistosoma mansoni]gi|360045148|emb|CCD82696.1| putative 30s ribosomal protein S12 family member [Schistosoma mansoni]
	Treg_003686	982.6	494.4	837.8	1090.3	556.9	819.6	734.1	528.6	-2.47	2.41e-24	gi|256078308|ref|XP_002575438.1| glycyl-tRNA synthetase [Schistosoma mansoni]gi|360043345|emb|CCD78758.1| putative glycyl-tRNA synthetase [Schistosoma mansoni]
	Treg_001190	349	298	301	359	249	305	293	257	-2.47	2.88e-34	gi|256071902|ref|XP_002572277.1| hypothetical protein [Schistosoma mansoni]gi|353232105|emb|CCD79460.1| hypothetical protein Smp_007970 [Schistosoma mansoni]
	Treg_000064	4488.2	4106.1	3337	5605.1	1824.2	1949.4	2453.7	2086.6	-2.47	2e-27	gi|226469958|emb|CAX70260.1| nervana 2 [Schistosoma japonicum]
	Treg_000462	2112	2149	1400	2926	513	626	629	540	-2.46	1.26e-24	gi|226470492|emb|CAX70526.1| Sorcin [Schistosoma japonicum]gi|226470494|emb|CAX70527.1| Sorcin [Schistosoma japonicum]
	Treg_000859	587	884.7	501.7	774.1	367.5	491.7	564.6	402.9	-2.46	4.62e-23	gi|256074993|ref|XP_002573806.1| hypothetical protein [Schistosoma mansoni]gi|360043386|emb|CCD78799.1| hypothetical protein Smp_023700.2 [Schistosoma mansoni]
	Treg_004192	114.3	65.2	87.6	92.1	45.7	60.6	61.3	71.5	-2.46	3.65e-21	gi|76152801|gb|AAX24479.2| SJCHGC02403 protein [Schistosoma japonicum]
	Treg_013804	47.4	4.9	281.6	64.8	7.9	22.5	13.8	20.5	-2.46	1.31e-05	NO HIT
	Treg_001696	593.9	229.7	403.6	486.1	80.6	86.8	122.6	126.7	-2.46	2.41e-29	gi|353231132|emb|CCD77550.1| putative monocarboxylate transporter [Schistosoma mansoni]
	Treg_015139	17.5	17.8	27.5	20.1	8.4	30.9	13.1	8.9	-2.46	1.69e-07	gi|350855123|emb|CCD58143.1| unnamed protein product [Schistosoma mansoni]
	Treg_016473	87	61	67	124	48	68	57	50	-2.46	6.93e-20	gi|350644972|emb|CCD60338.1| sialin (solute carrier family 17 member 5) (sodium/sialic acid cotransporter) (ast) (membrane glycoprotein hp59), putative [Schistosoma mansoni]
	Treg_002539	35.1	37.2	52	41.8	16.2	36.5	34.1	20.9	-2.46	9.07e-11	gi|256090225|ref|XP_002581105.1| multiple inositol polyphosphate phosphatase-related [Schistosoma mansoni]
	Treg_004117	264.1	261.4	203.4	298.6	150.1	221.6	172.9	174.5	-2.45	2.31e-27	gi|256084000|ref|XP_002578222.1| zinc finger protein [Schistosoma mansoni]gi|353232164|emb|CCD79519.1| putative zinc finger protein [Schistosoma mansoni]
	Treg_009004	344	385	276	381	169	253	234	186	-2.45	1.08e-26	gi|256053299|ref|XP_002570135.1| metaxin [Schistosoma mansoni]gi|350646625|emb|CCD58745.1| metaxin, putative [Schistosoma mansoni]
	Treg_010729	319	376	300	372	236	351	329	283	-2.45	2.89e-23	gi|360042662|emb|CCD78072.1| hypothetical protein Smp_052890 [Schistosoma mansoni]
	Treg_000864	1102	1005	854	1262	438	562	505	470	-2.45	3.57e-29	gi|56755343|gb|AAW25851.1| SJCHGC05658 protein [Schistosoma japonicum]gi|226480596|emb|CAX73395.1| Neurocalcin homolog [Schistosoma japonicum]
	Treg_001911	56	46	25	68	35	46	28	23	-2.45	4.91e-10	gi|56753027|gb|AAW24725.1| SJCHGC05627 protein [Schistosoma japonicum]gi|226466582|emb|CAX69426.1| hypothetical protein [Schistosoma japonicum]
	Treg_007627	591.3	625.1	456.6	502.4	360.5	361.8	351.3	291.5	-2.45	4.45e-27	gi|226483673|emb|CAX74137.1| NAP-1-related protein [Schistosoma japonicum]
	Treg_001673	247	91	320	252	58	60	45	83	-2.44	1.15e-18	NO HIT
	Treg_002333	90	63	64	73	37	58	49	47	-2.44	3.47e-24	gi|256084304|ref|XP_002578370.1| hypothetical protein [Schistosoma mansoni]gi|353231343|emb|CCD77761.1| hypothetical protein Smp_161190 [Schistosoma mansoni]
	Treg_016423	520	485	408	574	394	495	463	380	-2.44	6.61e-30	gi|76154425|gb|AAX25910.2| SJCHGC00939 protein [Schistosoma japonicum]
	Treg_014451	1175	828	786	1439	514	621	597	565	-2.44	4.51e-33	gi|256075603|ref|XP_002574107.1| exocyst complex protein exo70 [Schistosoma mansoni]
	Treg_000028	1715.8	2181.7	1191.8	1965.8	1233.6	1582.1	1616.4	1367.1	-2.43	4.81e-20	gi|347954075|gb|AEP33620.1| thioredoxin glutathione reductase [Schistosoma japonicum]
	Treg_002099	260	263	187	331	130	173	165	127	-2.43	3.88e-26	gi|256071414|ref|XP_002572035.1| hypothetical protein [Schistosoma mansoni]gi|350645031|emb|CCD60261.1| Hypothetical protein, putative [Schistosoma mansoni]
	Treg_010794	236	208	152	290	112	115	136	129	-2.43	1.28e-28	gi|256084103|ref|XP_002578272.1| UDP-glucose 4-epimerase [Schistosoma mansoni]gi|360042968|emb|CCD78378.1| UDP-glucose 4-epimerase [Schistosoma mansoni]
	Treg_012039	45.7	28	33.5	54.6	22.3	35.9	31.3	19.8	-2.43	2.74e-13	gi|226467500|emb|CAX69626.1| hypothetical protein [Schistosoma japonicum]
	Treg_009507	302	132	279	303	140	159	126	129	-2.43	5.08e-27	gi|56759238|gb|AAW27759.1| SJCHGC05418 protein [Schistosoma japonicum]
	Treg_000847	223.6	252.9	169.3	275	184.7	201.9	225.8	187.2	-2.43	2.31e-25	gi|56758054|gb|AAW27167.1| SJCHGC01947 protein [Schistosoma japonicum]
	Treg_007360	2476	1064	2284	2650	1162	1239	1375	1124	-2.43	2.23e-27	gi|46849992|gb|AAT02418.1| MAP kinase [Schistosoma japonicum]
	Treg_005431	113.5	14	68.5	97.3	51.9	57.3	40.7	42.8	-2.43	1.77e-07	gi|353229927|emb|CCD76098.1| hypothetical protein Smp_125870 [Schistosoma mansoni]
	Treg_000747	401.4	494.7	190	353.1	201.3	247.5	277.7	167.6	-2.43	3.11e-16	gi|256083401|ref|XP_002577933.1| 40s ribosomal protein [Schistosoma mansoni]gi|108861818|gb|ABG21811.1| 40S ribosomal protein S20-like protein [Schistosoma mansoni]gi|353231889|emb|CCD79244.1| putative 40s rRNA protein [Schistosoma mansoni]
	Treg_000702	201.2	81.1	88.7	275	121.7	110.9	157.5	112.7	-2.43	1.82e-12	gi|256083352|ref|XP_002577909.1| merlin/moesin/ezrin/radixin [Schistosoma mansoni]gi|360044614|emb|CCD82162.1| putative merlin/moesin/ezrin/radixin [Schistosoma mansoni]
	Treg_002011	488	620	407	655	368	410	424	331	-2.43	2.83e-21	gi|256082815|ref|XP_002577648.1| hypothetical protein [Schistosoma mansoni]gi|353231108|emb|CCD77526.1| hypothetical protein Smp_063760 [Schistosoma mansoni]
	Treg_001644	26.1	18	16.1	32.8	8.3	30.2	16.1	12.6	-2.43	6.07e-09	gi|226486446|emb|CAX74352.1| Protein CHMP7 [Schistosoma japonicum]
	Treg_001283	993.4	622.8	810.8	1085.8	528.4	596.7	598.3	533.6	-2.42	1.94e-35	gi|256080770|ref|XP_002576650.1| serine/threonine protein kinase [Schistosoma mansoni]gi|353232052|emb|CCD79407.1| serine/threonine kinase [Schistosoma mansoni]
	Treg_004954	19	30	29	51	20	27	24	25	-2.42	1.46e-10	gi|256052982|ref|XP_002569999.1| R-specific enoyl-CoA hydratase [Schistosoma mansoni]
	Treg_003779	403	403	359	464	275	328	333	275	-2.42	1.54e-35	gi|256085264|ref|XP_002578842.1| hypothetical protein [Schistosoma mansoni]
	Treg_000850	630	1101	612	1181	602	672	808	562	-2.42	9.28e-18	gi|256079509|ref|XP_002576029.1| hypothetical protein [Schistosoma mansoni]gi|360044582|emb|CCD82130.1| hypothetical protein Smp_047060 [Schistosoma mansoni]
	Treg_007431	12072	8043	8365	12030	6566	6855	6991	6003	-2.42	6.79e-22	gi|226478018|emb|CAX72702.1| Troponin T [Schistosoma japonicum]
	Treg_008624	1205.9	1479.8	1041.9	1406.9	485.2	622.5	562	400	-2.42	1.03e-31	gi|226471200|emb|CAX70681.1| Nucleolar protein 5 [Schistosoma japonicum]gi|226487994|emb|CAX75662.1| Nucleolar protein 5 [Schistosoma japonicum]
	Treg_001593	350	178	253	299	141	140	164	161	-2.41	3.73e-31	gi|76157118|gb|AAX28146.2| SJCHGC04988 protein [Schistosoma japonicum]
	Treg_014820	57.6	73.3	48.9	52.5	34.9	54	41.2	36.2	-2.41	5.16e-14	gi|76154554|gb|AAX26018.2| SJCHGC09595 protein [Schistosoma japonicum]
	Treg_004549	146.9	200.4	104.4	190.4	109.9	123.1	108.3	100.2	-2.41	2.57e-17	gi|60688907|gb|AAX30421.1| SJCHGC03475 protein [Schistosoma japonicum]gi|226484484|emb|CAX74151.1| hypothetical protein [Schistosoma japonicum]
	Treg_001526	202	233	149	250	134	188	160	130	-2.41	1.01e-21	gi|56756617|gb|AAW26481.1| SJCHGC05949 protein [Schistosoma japonicum]gi|226481373|emb|CAX73584.1| Trafficking protein particle complex subunit 2 [Schistosoma japonicum]gi|257205920|emb|CAX82611.1| Trafficking protein particle complex subunit 2 [Schistosoma japonicum]gi|257205932|emb|CAX82617.1| Trafficking protein particle complex subunit 2 [Schistosoma japonicum]
	Treg_017287	217	326	227	313	183	185	220	145	-2.41	4.97e-21	gi|256077588|ref|XP_002575084.1| hypothetical protein [Schistosoma mansoni]gi|350646701|emb|CCD58615.1| hypothetical protein Smp_037290 [Schistosoma mansoni]
	Treg_001863	775	751	631	833	623	785	733	683	-2.4	1.12e-30	gi|392514588|gb|AFM77717.1| vasa-like DEAD-box RNA helicase [Schistosoma mansoni]
	Treg_004305	204	233	180	230	152	193	150	127	-2.4	6.53e-22	gi|350646416|emb|CCD58913.1| tRNA pseudouridine synthase D, putative [Schistosoma mansoni]
	Treg_001873	632	574	485	805	376	473	450	416	-2.4	1.99e-29	gi|360042674|emb|CCD78084.1| hypothetical protein Smp_066330.2 [Schistosoma mansoni]
	Treg_010504	141	145	91	185	92	103	110	92	-2.4	2.55e-20	gi|256081079|ref|XP_002576801.1| pdz domain containing protein [Schistosoma mansoni]
	Treg_000590	422	200	293	415	229	277	255	209	-2.4	1.22e-27	gi|256073382|ref|XP_002573010.1| inhibitor of apoptosis 1 diap1 [Schistosoma mansoni]gi|360045214|emb|CCD82762.1| putative inhibitor of apoptosis 1, diap1 [Schistosoma mansoni]
	Treg_010177	776.2	444	551.4	664.7	288.8	354.2	352.1	290.9	-2.39	1.08e-33	gi|358341957|dbj|GAA49527.1| protein kinase cGMP-dependent [Clonorchis sinensis]
	Treg_016168	1247	377	1181	1064	449	531	439	438	-2.39	6.59e-17	gi|256078907|ref|XP_002575734.1| adamts (A disintegrin and metalloprotease [Schistosoma mansoni]gi|360042946|emb|CCD78356.1| putative adamts (A disintegrin and metalloprotease [Schistosoma mansoni]
	Treg_004012	1145	1531	1052	1586	651	878	759	641	-2.39	6.05e-22	gi|256071204|ref|XP_002571931.1| hypothetical protein [Schistosoma mansoni]gi|353231410|emb|CCD77828.1| hypothetical protein Smp_004710 [Schistosoma mansoni]
	Treg_004444	214	243	193	259	191	217	204	183	-2.39	2.21e-27	gi|226478930|emb|CAX72960.1| Ribosome production factor 1 [Schistosoma japonicum]
	Treg_002524	166	45	147	166	78	104	85	102	-2.38	1.84e-13	gi|358340605|dbj|GAA48459.1| cytosolic carboxypeptidase 1 [Clonorchis sinensis]
	Treg_004232	131.3	100.2	104.2	154.9	56	102.1	104.9	84	-2.38	2.1e-22	gi|432846704|ref|XP_004065903.1| PREDICTED: serine/threonine-protein kinase haspin-like [Oryzias latipes]
	Treg_011562	265	192	168	272	148	172	165	148	-2.38	2.53e-30	gi|256070810|ref|XP_002571735.1| hypothetical protein [Schistosoma mansoni]gi|360043142|emb|CCD78554.1| hypothetical protein Smp_123570 [Schistosoma mansoni]
	Treg_001601	271.4	295.6	245	289	230.7	236.9	213.9	206	-2.38	5.19e-27	gi|256053221|ref|XP_002570098.1| methyltransferase ncl1 [Schistosoma mansoni]
	Treg_001748	430	524	351	566	379	495	450	357	-2.38	2.09e-20	gi|226467428|emb|CAX69590.1| Thioredoxin domain-containing protein 1 precursor [Schistosoma japonicum]
	Treg_001200	1266	1304	949	1308	985	1191	1155	832	-2.37	2.12e-25	gi|74775323|sp|Q5DHT6.1|EIF3M_SCHJA RecName: Full=Eukaryotic translation initiation factor 3 subunit M; Short=eIF3mgi|56752817|gb|AAW24620.1| SJCHGC06559 protein [Schistosoma japonicum]
	Treg_002732	55.5	42	40.1	59.2	33.7	33.3	32.8	40.4	-2.37	2.32e-18	NO HIT
	Treg_016970	2196	1512	1602	2823	964	1306	1146	1169	-2.37	9.75e-31	gi|256070226|ref|XP_002571444.1| glycerol-3-phosphate dehydrogenase [Schistosoma mansoni]
	Treg_006604	574	601	459	651	321	389	432	368	-2.36	3.82e-19	gi|56755815|gb|AAW26086.1| SJCHGC09082 protein [Schistosoma japonicum]gi|226480896|emb|CAX73545.1| RING finger protein 146 [Schistosoma japonicum]
	Treg_000681	382	399	303	375	200	264	273	215	-2.36	2.79e-30	gi|353229671|emb|CCD75842.1| hypothetical protein Smp_083680 [Schistosoma mansoni]
	Treg_003755	305.9	40.3	415.5	297.5	147.4	183.6	119.1	207.5	-2.36	3.89e-07	gi|353228638|emb|CCD74809.1| hypothetical protein Smp_123960 [Schistosoma mansoni]
	Treg_005372	926.8	225.3	651.2	758.9	313.4	562.3	416.7	522.2	-2.36	6.8e-12	gi|350645423|emb|CCD59871.1| ccr4-not transcription complex, putative [Schistosoma mansoni]
	Treg_005336	431.6	476.6	253.9	411.7	3.8	7.4	476.6	297.4	-2.36	0.000485	gi|344295288|ref|XP_003419344.1| PREDICTED: tubulin alpha-3 chain-like [Loxodonta africana]
	Treg_010277	799	1216	661	1237	768	984	966	778	-2.36	4.87e-20	gi|256086218|ref|XP_002579299.1| ATP synthase delta chain mitochondrial [Schistosoma mansoni]gi|238664726|emb|CAZ35538.1| ATP synthase delta chain, mitochondrial,putative [Schistosoma mansoni]
	Treg_001918	121	120	110	125	70	113	102	60	-2.36	5.68e-19	gi|256085207|ref|XP_002578814.1| hypothetical protein [Schistosoma mansoni]gi|350645013|emb|CCD60296.1| hypothetical protein Smp_076450 [Schistosoma mansoni]
	Treg_000100	2626	2424	1745	3182	1744	1960	1972	1657	-2.36	1.97e-28	gi|256078884|ref|XP_002575723.1| basigin related [Schistosoma mansoni]gi|353231396|emb|CCD77814.1| basigin related [Schistosoma mansoni]
	Treg_000999	742	639	487	1013	351	426	384	343	-2.36	4.69e-28	gi|256073312|ref|XP_002572975.1| choline kinase [Schistosoma mansoni]gi|360043553|emb|CCD78966.1| choline kinase [Schistosoma mansoni]
	Treg_004088	594	468	427	729	265	353	352	276	-2.35	1.72e-29	gi|56754643|gb|AAW25507.1| SJCHGC05591 protein [Schistosoma japonicum]gi|226489044|emb|CAX74871.1| hypothetical protein [Schistosoma japonicum]gi|226489046|emb|CAX74872.1| hypothetical protein [Schistosoma japonicum]
	Treg_011173	90.6	71.7	80.7	87.6	44.5	61.3	73.4	41.9	-2.35	2.99e-21	gi|56755393|gb|AAW25876.1| SJCHGC00601 protein [Schistosoma japonicum]
	Treg_000699	110.1	80.1	100.5	101.7	49.2	68.8	98	69.8	-2.35	9.57e-20	gi|360045227|emb|CCD82775.1| putative 1-acylglycerol-3-phosphate acyltransferase [Schistosoma mansoni]
	Treg_001422	859.5	842.7	839.7	1076.3	651.5	792.8	827.3	734.7	-2.35	5.36e-31	gi|256088841|ref|XP_002580532.1| FAA1 Long-chain-fatty-acid--CoA ligase 1; long-chain-fatty-acid--CoA ligase [Schistosoma mansoni]
	Treg_006571	4411.5	4930.3	3058.1	4401.4	2176	2493.3	3156.7	1957	-2.34	5.04e-29	gi|353230042|emb|CCD76213.1| putative major egg antigen [Schistosoma mansoni]
	Treg_016922	259	298	191	323	159	219	215	137	-2.34	2.05e-20	gi|256081892|ref|XP_002577201.1| 60S ribosomal protein L24 [Schistosoma mansoni]gi|353232090|emb|CCD79445.1| putative 60s ribosomal protein L24 [Schistosoma mansoni]
	Treg_003791	4939	5978	3755	4799	3018	3532	3951	2727	-2.33	5.78e-27	gi|353229380|emb|CCD75551.1| unnamed protein product [Schistosoma mansoni]
	Treg_014782	62.8	150.3	116.2	157.7	105.3	131.8	60.6	42.7	-2.33	1.26e-08	gi|360044419|emb|CCD81967.1| putative pyruvate dehydrogenase [Schistosoma mansoni]
	Treg_007279	145.3	23.2	104.1	206.5	42	82.9	57.9	92.7	-2.33	1.59e-07	gi|257215898|emb|CAX83101.1| RNA-binding protein 5 [Schistosoma japonicum]
	Treg_005764	227.7	77.1	138.3	359.8	137.2	135.8	72	154.1	-2.33	4.78e-10	gi|256081505|ref|XP_002577010.1| adiponectin receptor [Schistosoma mansoni]gi|238662302|emb|CAZ33247.1| adiponectin receptor, putative [Schistosoma mansoni]
	Treg_000588	284.2	146.3	114.5	141.8	148	98.8	49.3	123.3	-2.33	1.14e-10	gi|256079614|ref|XP_002576081.1| ferritin [Schistosoma mansoni]
	Treg_014544	45.6	36.5	13.8	43	18.7	21.6	13.9	37.1	-2.33	1.79e-06	gi|256077440|ref|XP_002575012.1| hypothetical protein [Schistosoma mansoni]gi|238660235|emb|CAZ31245.1| hypothetical protein Smp_141820.3 [Schistosoma mansoni]
	Treg_004280	176	215	121	256	140	165	155	117	-2.33	8.89e-18	gi|256070649|ref|XP_002571655.1| hypothetical protein [Schistosoma mansoni]gi|353232959|emb|CCD80314.1| hypothetical protein Smp_123070 [Schistosoma mansoni]
	Treg_014936	241.7	189.4	161.1	220.6	111.7	117.8	127.1	114.8	-2.33	1.24e-26	gi|226470784|emb|CAX76825.1| calreticulin [Schistosoma japonicum]
	Treg_000580	148.5	74.5	117.1	185.2	89.4	100.3	100.8	87.3	-2.32	3.29e-22	gi|76156473|gb|AAX27677.2| SJCHGC01565 protein [Schistosoma japonicum]
	Treg_001717	770	556	502	900	391	499	444	473	-2.32	1.35e-26	gi|353231610|emb|CCD78028.1| nicotinate phosphoribosyltransferase related pre-B cell enhancing factor [Schistosoma mansoni]
	Treg_008387	573.9	555.9	454.7	628.9	333.4	381.3	439.2	348.7	-2.32	1.41e-32	gi|256079108|ref|XP_002575832.1| hypothetical protein [Schistosoma mansoni]gi|360044014|emb|CCD81560.1| hypothetical protein Smp_045070 [Schistosoma mansoni]
	Treg_009699	2200.3	1793.8	1480	2472.5	556.7	562.9	678.6	565.7	-2.32	1.11e-26	gi|256079038|ref|XP_002575798.1| marvel-containing potential lipid raft-associated protein [Schistosoma mansoni]gi|353232747|emb|CCD80102.1| putative marvel-containing potential lipid raft-associated protein [Schistosoma mansoni]
	Treg_000059	774	1195	601	1159	622	784	887	619	-2.32	3.54e-18	gi|56756965|gb|AAW26654.1| SJCHGC04370 protein [Schistosoma japonicum]gi|226472462|emb|CAX77267.1| NADH dehydrogenase (ubiquinone) Fe-S protein 6 [Schistosoma japonicum]gi|226472464|emb|CAX77268.1| NADH dehydrogenase (ubiquinone) Fe-S protein 6 [Schistosoma japonicum]gi|226472466|emb|CAX77269.1| NADH dehydrogenase (ubiquinone) Fe-S protein 6 [Schistosoma japonicum]gi|226472468|emb|CAX77270.1| NAD…
	Treg_004010	1237	1275	949	1344	814	898	975	834	-2.32	2.52e-20	gi|353228801|emb|CCD74972.1| putative z-protein (S1r protein) [Schistosoma mansoni]
	Treg_002436	52	58	43	58	41	46	48	27	-2.31	9.79e-12	gi|350646370|emb|CCD58963.1| Aromatic-L-amino-acid decarboxylase (EC 4.1.1.28) (AADC) (DOPA decarboxylase) (DDC),putative [Schistosoma mansoni]
	Treg_009849	1403	628.9	983.3	1213.4	811.4	1068.6	969.3	870.8	-2.31	1.07e-26	gi|256092832|ref|XP_002582081.1| Protein C10orf118 (CTCL tumor antigen HD-CL-01/L14-2) [Schistosoma mansoni]gi|353228875|emb|CCD75046.1| putative protein C10orf118 (CTCL tumor antigen HD-CL-01/L14-2) [Schistosoma mansoni]
	Treg_017328	79	56	206	56	55	48	104	55	-2.31	5.89e-07	gi|256083009|ref|XP_002577743.1| Progesterone-induced-blocking factor [Schistosoma mansoni]
	Treg_000340	2036	3092	1580	2985	938	1179	1301	982	-2.31	6.24e-26	gi|256074214|ref|XP_002573421.1| hypothetical protein [Schistosoma mansoni]gi|350645160|emb|CCD60102.1| hypothetical protein Smp_019750.2 [Schistosoma mansoni]
	Treg_014961	978	668	748	1142	505	591	565	507	-2.31	4.34e-32	gi|226486824|emb|CAX74489.1| hypothetical protein [Schistosoma japonicum]
	Treg_014594	3140	5069	3007	3711	1738	2219	2551	1567	-2.31	5.48e-25	gi|226476708|emb|CAX72246.1| ribosomal protein S3 [Schistosoma japonicum]gi|226476710|emb|CAX72247.1| ribosomal protein S3 [Schistosoma japonicum]gi|226476714|emb|CAX72249.1| ribosomal protein S3 [Schistosoma japonicum]gi|226476718|emb|CAX72251.1| ribosomal protein S3 [Schistosoma japonicum]gi|226476722|emb|CAX72253.1| ribosomal protein S3 [Schistosoma japonicum]gi|226476724|emb|CAX72254.1| ribos…
	Treg_010522	498	283	379	557	306	320	327	309	-2.3	3.09e-29	gi|358334278|dbj|GAA52708.1| hypothetical protein CLF_108653 [Clonorchis sinensis]
	Treg_011771	185	241	162	212	167	165	216	134	-2.3	1.48e-19	gi|358254204|dbj|GAA54226.1| exosome complex component RRP4 [Clonorchis sinensis]
	Treg_005513	127.8	39.6	109.7	118	62.5	92.9	65.3	69.2	-2.3	1.04e-12	gi|256072205|ref|XP_002572427.1| phd/f-box containing protein [Schistosoma mansoni]
	Treg_002561	29.6	17.1	215.4	36.2	21.1	7.5	30.2	2.6	-2.29	0.000113	NO HIT
	Treg_003729	831	603.2	903.9	1025.1	663.8	855.7	740.2	676.4	-2.29	4.25e-29	gi|256077704|ref|XP_002575141.1| talin 2 [Schistosoma mansoni]
	Treg_003746	5454	8809	4521	7054	4020	5276	5133	3866	-2.29	2.18e-24	gi|29841159|gb|AAP06172.1| SJCHGC06175 protein [Schistosoma japonicum]gi|226467884|emb|CAX76169.1| small subunit ribosomal protein S2e [Schistosoma japonicum]gi|226467888|emb|CAX76171.1| small subunit ribosomal protein S2e [Schistosoma japonicum]gi|226471744|emb|CAX70953.1| small subunit ribosomal protein S2e [Schistosoma japonicum]gi|226471748|emb|CAX70955.1| small subunit ribosomal protein S2e …
	Treg_003987	867.2	781.1	641.4	1106.4	665.1	801.5	830.2	722.3	-2.29	6.59e-28	gi|256074089|ref|XP_002573359.1| eh domain containing/past-1-related [Schistosoma mansoni]gi|350646820|emb|CCD58541.1| eh domain containing/past-1-related [Schistosoma mansoni]
	Treg_004560	113.9	146.7	71	124	77.7	111.9	106.6	63.2	-2.29	2.07e-12	gi|360044019|emb|CCD81565.1| putative dna polymerase epsilon, catalytic subunit [Schistosoma mansoni]
	Treg_004144	319.2	213.8	248.9	294	221.8	260.5	265.6	228.8	-2.29	4.3e-33	gi|256089204|ref|XP_002580704.1| hypothetical protein [Schistosoma mansoni]gi|353233390|emb|CCD80745.1| hypothetical protein Smp_098450.1 [Schistosoma mansoni]
	Treg_010276	393	567	321	574	344	400	485	332	-2.29	2.39e-18	gi|256070824|ref|XP_002571742.1| hypothetical protein [Schistosoma mansoni]gi|218527145|gb|ACK86681.1| DIF_7 [Schistosoma mansoni]gi|353233003|emb|CCD80358.1| hypothetical protein Smp_002740.2 [Schistosoma mansoni]
	Treg_001478	842	376	555	658	154	202	170	154	-2.28	2.1e-31	gi|353228670|emb|CCD74841.1| unnamed protein product [Schistosoma mansoni]
	Treg_001893	93	77	75	85	20	25	43	37	-2.28	3.04e-18	gi|256077313|ref|XP_002574951.1| hypothetical protein [Schistosoma mansoni]gi|353229816|emb|CCD75987.1| hypothetical protein Smp_141480 [Schistosoma mansoni]
	Treg_008545	1087	1865	853	1806	569	648	752	541	-2.28	6.05e-24	gi|56756615|gb|AAW26480.1| SJCHGC06054 protein [Schistosoma japonicum]gi|226467452|emb|CAX69602.1| superoxide dismutase 2, mitochondrial [Schistosoma japonicum]
	Treg_017607	437	164	266	531	203	245	175	209	-2.28	1.02e-18	gi|256073766|ref|XP_002573199.1| rna-binding protein musashi-related [Schistosoma mansoni]
	Treg_002065	169.1	193.3	139	178.7	143.8	187	191.9	133.5	-2.28	9.66e-20	gi|56754925|gb|AAW25645.1| SJCHGC03203 protein [Schistosoma japonicum]
	Treg_001791	445	211	278	410	220	252	194	207	-2.28	1.23e-26	gi|56752891|gb|AAW24657.1| SJCHGC05698 protein [Schistosoma japonicum]
	Treg_004104	111.5	49.4	0	5.2	33.5	37.2	39.1	19.5	-2.28	0.00966	gi|555937116|emb|CDJ14237.1| pro neuregulin 2, membrane bound [Hymenolepis microstoma]
	Treg_000032	8020	4012	5393	6741	2654	2407	2831	2222	-2.28	1.74e-29	gi|256085019|ref|XP_002578722.1| hypothetical protein [Schistosoma mansoni]gi|350645855|emb|CCD59459.1| hypothetical protein Smp_075400.1 [Schistosoma mansoni]
	Treg_001925	212	226	170	242	173	205	238	178	-2.28	2.96e-24	gi|256083042|ref|XP_002577759.1| deoxyhypusine synthase [Schistosoma mansoni]gi|353231269|emb|CCD77687.1| putative deoxyhypusine synthase [Schistosoma mansoni]
	Treg_003857	615	515.4	277.1	627.7	187.6	318.8	623.8	172.5	-2.28	1.14e-09	gi|256079614|ref|XP_002576081.1| ferritin [Schistosoma mansoni]
	Treg_007328	1036	1281	779	1297	690	868	815	678	-2.28	8.93e-21	gi|256073490|ref|XP_002573063.1| chaperone protein DNAj [Schistosoma mansoni]
	Treg_000355	134	29	95	90	32	31	33	28	-2.27	1.09e-15	gi|76153991|gb|AAX25530.2| SJCHGC04677 protein [Schistosoma japonicum]
	Treg_005405	777.7	703.2	597.8	839.9	280.2	366.3	316.1	308.6	-2.27	4.29e-33	NO HIT
	Treg_002904	23	13.8	15.3	30.7	13.1	19.5	1.9	16.4	-2.27	4.6e-06	gi|256089387|ref|XP_002580792.1| neuronal RhoA GEF protein [Schistosoma mansoni]
	Treg_009259	128	138.6	80.5	151.2	99.3	100.9	143.9	107.1	-2.27	6.31e-15	gi|256084520|ref|XP_002578476.1| hypothetical protein [Schistosoma mansoni]gi|353229232|emb|CCD75403.1| hypothetical protein Smp_161750 [Schistosoma mansoni]
	Treg_001700	22	38	20	40	19	31	25	21	-2.26	8.23e-08	NO HIT
	Treg_000869	3611	5276	2912	4624	2289	2739	3144	2010	-2.26	3.24e-25	gi|256089704|ref|XP_002580912.1| 40S ribosomal protein S10 [Schistosoma mansoni]
	Treg_011240	80	89.8	114.2	105.5	70.9	71.8	104.8	86.3	-2.26	1.44e-13	gi|256080591|ref|XP_002576563.1| synaptotagmin [Schistosoma mansoni]
	Treg_007840	234.4	56	202.5	183.2	47	75.4	35.5	58.1	-2.26	6.68e-15	gi|256077810|ref|XP_002575193.1| serine/threonine protein kinase [Schistosoma mansoni]gi|360043639|emb|CCD81185.1| serine/threonine kinase [Schistosoma mansoni]
	Treg_006288	407	391	352	446	236	269	291	205	-2.26	4.66e-26	gi|256075889|ref|XP_002574248.1| hypothetical protein [Schistosoma mansoni]gi|353229541|emb|CCD75712.1| hypothetical protein Smp_028060 [Schistosoma mansoni]
	Treg_001722	1103	772	889	1230	489	490	621	502	-2.26	9.97e-28	gi|11878097|gb|AAG40801.1| Mf2 protein [Schistosoma japonicum]
	Treg_000940	1656	795	1088	1900	1029	1195	1320	1213	-2.25	1.38e-25	gi|256066532|ref|XP_002570555.1| zinc finger protein [Schistosoma mansoni]
	Treg_001004	804	438	568	967	476	590	491	526	-2.25	2.69e-27	gi|555937596|emb|CDJ14717.1| protein phosphatase methylesterase 1 [Hymenolepis microstoma]
	Treg_001349	563	231	517	535	331	441	342	351	-2.25	8.56e-18	gi|256078399|ref|XP_002575483.1| AMP-activated protein kinase gamma regulatory subunit [Schistosoma mansoni]gi|350645919|emb|CCD59384.1| AMP-activated protein kinase, gamma regulatory subunit, putative [Schistosoma mansoni]
	Treg_001929	124	167.8	109.7	172.2	94	107.5	161.1	89.4	-2.25	8.72e-14	gi|29841469|gb|AAP06501.1| hypothetical protein MGC1203 in Homo sapiens; similar to GenBank Accession Number BC022848 hypothetical protein MGC1203 in Homo sapiens [Schistosoma japonicum]
	Treg_000309	1125.4	1381.1	854.6	1416.1	983.1	1148.4	1121.9	873.4	-2.25	5.08e-22	gi|56755771|gb|AAW26064.1| SJCHGC06192 protein [Schistosoma japonicum]gi|226478594|emb|CAX72792.1| Eukaryotic translation initiation factor 3 subunit 5 [Schistosoma japonicum]gi|226478706|emb|CAX72848.1| Eukaryotic translation initiation factor 3 subunit 5 [Schistosoma japonicum]gi|257205694|emb|CAX82498.1| Eukaryotic translation initiation factor 3 subunit 5 [Schistosoma japonicum]gi|257205952|e…
	Treg_002841	51	26	32	49	10	15	26	14	-2.25	3.74e-15	gi|256080512|ref|XP_002576525.1| hypothetical protein [Schistosoma mansoni]gi|353231697|emb|CCD79052.1| hypothetical protein Smp_150150 [Schistosoma mansoni]
	Treg_018648	67	70	51	93	55	64	60	42	-2.25	2.95e-14	gi|256071053|ref|XP_002571856.1| hypothetical protein [Schistosoma mansoni]gi|353228584|emb|CCD74755.1| hypothetical protein Smp_124290 [Schistosoma mansoni]
	Treg_008552	414	480.3	309.4	479.6	296	302.7	349.4	238.9	-2.25	4.2e-24	gi|226487258|emb|CAX75494.1| integrin beta 4 binding protein [Schistosoma japonicum]
	Treg_017108	683	825	533	782	503	639	630	479	-2.25	8.14e-17	gi|226482382|emb|CAX73790.1| DNA-binding SAP,domain-containing protein [Schistosoma japonicum]
	Treg_001804	356	382	312	382	243	293	304	249	-2.24	2.58e-26	gi|257206284|emb|CAX82793.1| PRKCA-binding protein [Schistosoma japonicum]
	Treg_002088	244.2	252.1	195.4	285.2	169.9	240.2	260.8	188.2	-2.24	1.1e-25	gi|256086240|ref|XP_002579310.1| ferredoxin/ferredoxin--NADP reductase-related [Schistosoma mansoni]gi|238664737|emb|CAZ35549.1| ferredoxin/ferredoxin--NADP reductase-related [Schistosoma mansoni]
	Treg_015902	1424	1924	1093	1752	1269	1435	1673	1275	-2.24	1.93e-16	gi|56755701|gb|AAW26029.1| SJCHGC05667 protein [Schistosoma japonicum]gi|226468456|emb|CAX69905.1| Mitochondrial fission 1 protein [Schistosoma japonicum]
	Treg_017335	296	214	258	306	153	187	172	154	-2.24	8.6e-32	gi|256085458|ref|XP_002578938.1| hypothetical protein [Schistosoma mansoni]gi|353233501|emb|CCD80856.1| hypothetical protein Smp_164050 [Schistosoma mansoni]
	Treg_015029	878	1256.2	648.7	1226.9	816.9	960.1	975.2	713.7	-2.24	1.09e-16	gi|56754497|gb|AAW25436.1| SJCHGC01281 protein [Schistosoma japonicum]gi|60279645|dbj|BAD90103.1| thioredoxin peroxidase-3 [Schistosoma japonicum]gi|226480794|emb|CAX73494.1| Peroxiredoxin 5037 [Schistosoma japonicum]
	Treg_008256	225	301	212	335	221	324	276	228	-2.24	1.37e-18	gi|256089459|ref|XP_002580827.1| hypothetical protein [Schistosoma mansoni]gi|360043530|emb|CCD78943.1| putative keratinocytes-associated protein 2 (KCP-2) [Schistosoma mansoni]
	Treg_009583	335	320	244	430	238	272	328	225	-2.24	1e-22	gi|256080774|ref|XP_002576652.1| hypothetical protein [Schistosoma mansoni]gi|353232049|emb|CCD79404.1| hypothetical protein Smp_150840.1 [Schistosoma mansoni]
	Treg_006281	34.8	20.8	27.5	22	14.2	0	18	37.3	-2.24	7.72e-05	gi|256066153|ref|XP_002570485.1| peripheral-type benzodiazepine receptor [Schistosoma mansoni]gi|353232625|emb|CCD79979.1| putative peripheral-type benzodiazepine receptor [Schistosoma mansoni]
	Treg_007094	8653	11519	5625	11025	5843	6769	7800	5774	-2.24	3.29e-22	gi|226487050|emb|CAX75390.1| ATP synthase, H+ transporting, mitochondrial F1 complex, beta polypeptide [Schistosoma japonicum]
	Treg_001947	732	861	608	852	616	779	774	603	-2.23	4.15e-23	gi|56755505|gb|AAW25931.1| SJCHGC06488 protein [Schistosoma japonicum]gi|226484698|emb|CAX74258.1| hypothetical protein [Schistosoma japonicum]
	Treg_006724	3166.1	1247	2505.7	3048.1	1550.3	1646	1619.6	1623.4	-2.23	7.34e-25	gi|256078308|ref|XP_002575438.1| glycyl-tRNA synthetase [Schistosoma mansoni]gi|360043345|emb|CCD78758.1| putative glycyl-tRNA synthetase [Schistosoma mansoni]
	Treg_008484	134	99	65	159	76	84	106	78	-2.23	8.53e-17	gi|226479052|emb|CAX73021.1| hypotheticial protein [Schistosoma japonicum]
	Treg_009024	590	648	401	569	294	388	393	292	-2.23	3.41e-18	gi|256089335|ref|XP_002580767.1| hypothetical protein [Schistosoma mansoni]gi|350646612|emb|CCD58732.1| hypothetical protein Smp_099320 [Schistosoma mansoni]
	Treg_011026	185.4	210.9	147.2	232.8	115.3	145.8	111.2	120.4	-2.23	7.88e-23	gi|56756252|gb|AAW26301.1| SJCHGC05876 protein [Schistosoma japonicum]
	Treg_011259	287	270	256	349	157	175	245	205	-2.23	2.51e-29	gi|256086128|ref|XP_002579257.1| hypothetical protein [Schistosoma mansoni]gi|353232227|emb|CCD79582.1| hypothetical protein Smp_166180 [Schistosoma mansoni]
	Treg_017378	693	782	458	734	524	561	645	432	-2.23	4.49e-15	gi|256084865|ref|XP_002578646.1| translocon-associated protein gamma subunit [Schistosoma mansoni]gi|350645054|emb|CCD60236.1| translocon-associated protein, gamma subunit,putative [Schistosoma mansoni]
	Treg_001723	177	160	125	169	117	124	172	125	-2.23	4.21e-22	gi|256077464|ref|XP_002575024.1| spry domain containing socs box protein [Schistosoma mansoni]gi|360043945|emb|CCD81491.1| putative spry domain containing socs box protein [Schistosoma mansoni]
	Treg_004229	26.6	17.4	24.6	36.2	11.6	21.6	4.5	8.4	-2.23	2.54e-10	gi|226480554|emb|CAX73374.1| Ethanolamine kinase 1 [Schistosoma japonicum]
	Treg_002564	52	44	33	55	34	30	30	32	-2.22	1.95e-12	gi|256075582|ref|XP_002574097.1| innexin [Schistosoma mansoni]gi|360045426|emb|CCD82974.1| putative innexin [Schistosoma mansoni]
	Treg_007327	2817	3118	1979	3370	993	1118	1181	1028	-2.22	1.21e-21	gi|256084155|ref|XP_002578297.1| hypothetical protein [Schistosoma mansoni]gi|353229881|emb|CCD76052.1| hypothetical protein Smp_071050 [Schistosoma mansoni]
	Treg_009100	401	510	262	491	283	333	361	232	-2.22	2.08e-19	NO HIT
	Treg_009575	556	440	366	665	276	283	317	307	-2.22	2.21e-24	gi|226490142|emb|CAX69313.1| Protein of unknown function DUF914, eukaryotic,domain-containing protein [Schistosoma japonicum]
	Treg_016325	2777	1151	2312.3	2877.2	1349.4	1606.1	1492.2	1502.3	-2.22	3.22e-27	gi|256073265|ref|XP_002572952.1| alpha-actinin [Schistosoma mansoni]gi|353230971|emb|CCD77388.1| putative alpha-actinin [Schistosoma mansoni]
	Treg_012719	73	85	59	89	29	42	27	24	-2.22	9.11e-19	gi|56759402|gb|AAW27841.1| SJCHGC06436 protein [Schistosoma japonicum]gi|257205684|emb|CAX82493.1| hypothetical protein [Schistosoma japonicum]
	Treg_000444	481	698	385	589	397	533	612	410	-2.22	5.41e-17	gi|29841447|gb|AAP06479.1| SJCHGC06009 protein [Schistosoma japonicum]
	Treg_002426	138	127	88	129	72	91	92	81	-2.22	5.15e-22	gi|256084044|ref|XP_002578243.1| hypothetical protein [Schistosoma mansoni]
	Treg_000533	1866	1580	1366	2003	430	587	620	483	-2.21	5.63e-25	gi|56757021|gb|AAW26682.1| SJCHGC01267 protein [Schistosoma japonicum]
	Treg_006524	3956	2107	3236	4769	3335	3969	3767	3574	-2.21	1.49e-18	gi|360045358|emb|CCD82906.1| putative glycogen phosphorylase [Schistosoma mansoni]
	Treg_017914	182	198	155	213	150	200	225	156	-2.21	1.87e-21	gi|256084196|ref|XP_002578317.1| AAA family ATPase [Schistosoma mansoni]gi|360043407|emb|CCD78820.1| putative aaa family ATPase [Schistosoma mansoni]
	Treg_016251	2926	2306	1976	2984	804	1028	1112	884	-2.21	4.84e-26	gi|256081733|ref|XP_002577122.1| hypothetical protein [Schistosoma mansoni]gi|360044673|emb|CCD82221.1| hypothetical protein Smp_153550 [Schistosoma mansoni]
	Treg_000325	1148	580	680	1111	210	271	291	256	-2.21	1.33e-28	gi|256078451|ref|XP_002575509.1| hypothetical protein [Schistosoma mansoni]gi|350645945|emb|CCD59410.1| hypothetical protein Smp_041550 [Schistosoma mansoni]
	Treg_000400	1747.1	643	1235.1	1733.2	735.1	929.1	743	759.1	-2.2	3.01e-22	gi|256070471|ref|XP_002571566.1| GTP binding protein [Schistosoma mansoni]
	Treg_002352	534	515	383	642	316	393	389	324	-2.2	4.55e-20	gi|226471206|emb|CAX70684.1| hypotherical protein [Schistosoma japonicum]gi|226471208|emb|CAX70685.1| hypotherical protein [Schistosoma japonicum]gi|226488010|emb|CAX75670.1| hypotherical protein [Schistosoma japonicum]
	Treg_002516	58	53	46	79	20	25	28	25	-2.2	1.41e-21	gi|350645458|emb|CCD59810.1| hypothetical protein Smp_149560 [Schistosoma mansoni]
	Treg_004060	16.5	12	19.2	22.1	15.4	20.8	14.3	11.3	-2.2	1.34e-09	gi|56755874|gb|AAW26115.1| SJCHGC08768 protein [Schistosoma japonicum]
	Treg_008363	120	128	99	153	86	119	107	98	-2.2	8.96e-20	gi|56755683|gb|AAW26020.1| SJCHGC05881 protein [Schistosoma japonicum]
	Treg_001626	658.4	920.6	433.2	827.7	673	778.5	866.9	681.5	-2.2	3.18e-13	gi|360042822|emb|CCD78232.1| putative selenoprotein T [Schistosoma mansoni]
	Treg_001346	472	417	381	558	366	479	397	359	-2.19	4.49e-30	gi|226482630|emb|CAX73914.1| Ubiquitin-conjugating enzyme E2 J1 [Schistosoma japonicum]
	Treg_006348	4342	2915	3173	5399	1887	2297	2202	2202	-2.19	1.94e-26	gi|226479140|emb|CAX73065.1| Phosphofructokinase [Schistosoma japonicum]
	Treg_000443	568	736	464	723	525	667	668	476	-2.19	8.33e-20	gi|56755083|gb|AAW25721.1| SJCHGC02913 protein [Schistosoma japonicum]gi|226470362|emb|CAX70461.1| CBF1 interacting corepressor [Schistosoma japonicum]gi|226470364|emb|CAX70462.1| CBF1 interacting corepressor [Schistosoma japonicum]gi|226485649|emb|CAX75244.1| CBF1 interacting corepressor [Schistosoma japonicum]gi|226485651|emb|CAX75245.1| CBF1 interacting corepressor [Schistosoma japonicum]
	Treg_000014	4365	5146	2906	4233	2360	2968	3239	2059	-2.19	2.65e-24	gi|56754557|gb|AAW25466.1| SJCHGC01952 protein [Schistosoma japonicum]gi|226475040|emb|CAX71808.1| ribosomal protein S8 [Schistosoma japonicum]gi|226475042|emb|CAX71809.1| ribosomal protein S8 [Schistosoma japonicum]gi|226475044|emb|CAX71810.1| ribosomal protein S8 [Schistosoma japonicum]gi|226475046|emb|CAX71811.1| ribosomal protein S8 [Schistosoma japonicum]gi|226476424|emb|CAX78063.1| ribosoma…
	Treg_007537	78.7	76.9	89.3	92.7	52.9	79.3	51.9	74.4	-2.19	2.15e-13	gi|256072296|ref|XP_002572472.1| suppression of tumorigenicity [Schistosoma mansoni]
	Treg_000536	550	716	502	718	420	509	542	363	-2.18	2.38e-18	gi|56753143|gb|AAW24781.1| SJCHGC04348 protein [Schistosoma japonicum]gi|226489382|emb|CAX75835.1| putative Prefoldin subunit 2 [Schistosoma japonicum]gi|226489386|emb|CAX75837.1| putative Prefoldin subunit 2 [Schistosoma japonicum]
	Treg_015967	1767.5	2367	1550.6	2267.6	1541.2	1917.9	2032.2	1526	-2.18	7.58e-24	gi|44829173|tpg|DAA04500.1| TPA_exp: pol polyprotein [Schistosoma mansoni]
	Treg_001652	67	22	56	56	42	43	38	33	-2.18	1.81e-12	gi|353231160|emb|CCD77578.1| hypothetical protein Smp_122870 [Schistosoma mansoni]
	Treg_000515	728	483	571	682	407	487	438	418	-2.18	9.2e-30	gi|256089392|ref|XP_002580794.1| cationic amino acid transporter [Schistosoma mansoni]
	Treg_001622	26.9	0	12.2	10	12.8	11.3	11.3	5.6	-2.18	0.00179	gi|256077124|ref|XP_002574858.1| hypothetical protein [Schistosoma mansoni]gi|353229177|emb|CCD75348.1| hypothetical protein Smp_034090 [Schistosoma mansoni]
	Treg_001653	288	324	225	304	177	241	246	193	-2.18	4.65e-21	gi|256074240|ref|XP_002573434.1| hypothetical protein [Schistosoma mansoni]gi|350645176|emb|CCD60118.1| hypothetical protein Smp_019820 [Schistosoma mansoni]
	Treg_001250	104	98	87	103	74	85	77	74	-2.17	1.46e-16	gi|256082769|ref|XP_002577625.1| hypothetical protein [Schistosoma mansoni]gi|353230209|emb|CCD76380.1| hypothetical protein Smp_063540 [Schistosoma mansoni]
	Treg_001411	654.8	840.3	584.2	890.2	461.6	624.9	657.3	504.2	-2.17	1.18e-15	gi|353232054|emb|CCD79409.1| acyl-CoA thioesterase-related [Schistosoma mansoni]
	Treg_005837	88.2	119.2	53.9	48.9	49.5	63.9	100.9	60.3	-2.17	2.76e-07	gi|76152785|gb|AAX24464.2| SJCHGC05084 protein [Schistosoma japonicum]
	Treg_008939	1467	1805	1089	2157	1376	1636	1720	1237	-2.17	1.22e-21	gi|256077026|ref|XP_002574809.1| ATP synthase gamma subunit [Schistosoma mansoni]gi|350646456|emb|CCD58855.1| ATP synthase gamma subunit, putative [Schistosoma mansoni]
	Treg_018205	128	165	129	173	78	144	113	96	-2.17	5.47e-18	gi|76152916|gb|AAX24588.2| SJCHGC01861 protein [Schistosoma japonicum]
	Treg_000338	5809.3	9066.3	4548.8	7769.2	4742.9	5797.4	6362.1	4851.6	-2.17	4.86e-22	gi|462011|sp|P33676.1|ENO_SCHJA RecName: Full=Enolase; AltName: Full=2-phospho-D-glycerate hydro-lyase; AltName: Full=2-phosphoglycerate dehydratasegi|349802|gb|AAA29874.1| enolase [Schistosoma japonicum]gi|56755645|gb|AAW26001.1| unknown [Schistosoma japonicum]gi|257123775|gb|ACV41761.1| enolase [Schistosoma japonicum]
	Treg_008692	404	299	306	441	274	310	329	309	-2.17	9.82e-30	gi|256085403|ref|XP_002578911.1| hypothetical protein [Schistosoma mansoni]
	Treg_002552	586.2	400.1	437.2	561	389.8	451.9	420	392.5	-2.17	4.62e-28	gi|256079686|ref|XP_002576116.1| GTP-binding protein-related [Schistosoma mansoni]gi|353230000|emb|CCD76171.1| GTP-binding protein-related [Schistosoma mansoni]
	Treg_003843	478.8	259.8	310.2	575.6	327.8	415.4	453.6	366.7	-2.17	4.32e-21	gi|256077076|ref|XP_002574834.1| hypothetical protein [Schistosoma mansoni]gi|350646483|emb|CCD58882.1| hypothetical protein Smp_033870 [Schistosoma mansoni]
	Treg_007034	368	480	322	424	272	296	357	276	-2.17	9.63e-23	gi|256075948|ref|XP_002574277.1| brix domain containing protein [Schistosoma mansoni]gi|350645877|emb|CCD59422.1| brix domain containing protein, putative [Schistosoma mansoni]
	Treg_001755	29	27	24	39	11	13	22	11	-2.17	1.07e-12	gi|256073362|ref|XP_002573000.1| hypothetical protein [Schistosoma mansoni]gi|350645255|emb|CCD60036.1| hypothetical protein Smp_130500 [Schistosoma mansoni]
	Treg_007180	71.5	57.1	46.5	95	40	54.5	36.2	64.2	-2.17	9.04e-11	gi|256071134|ref|XP_002571896.1| hypothetical protein [Schistosoma mansoni]gi|350645645|emb|CCD59620.1| hypothetical protein Smp_004360.1 [Schistosoma mansoni]
	Treg_001763	353.4	479.7	316.8	487.7	344.7	500	449.9	363.2	-2.16	6.72e-16	gi|56759036|gb|AAW27658.1| SJCHGC04174 protein [Schistosoma japonicum]gi|226487786|emb|CAX75558.1| malignant T cell amplified sequence 1 [Schistosoma japonicum]gi|226487788|emb|CAX75559.1| malignant T cell amplified sequence 1 [Schistosoma japonicum]gi|226487790|emb|CAX75560.1| malignant T cell amplified sequence 1 [Schistosoma japonicum]gi|226487792|emb|CAX75561.1| malignant T cell amplified seq…
	Treg_018184	66	13	303	96	48	15	29	21	-2.16	2.27e-05	NO HIT
	Treg_001064	450	329	336	503	123	149	163	126	-2.16	1.53e-26	gi|353232432|emb|CCD79787.1| putative n-acetylgalactosaminyltransferase [Schistosoma mansoni]
	Treg_000919	88	91	57	109	51	67	68	68	-2.16	5.4e-15	gi|353230391|emb|CCD76562.1| hypothetical protein Smp_196910 [Schistosoma mansoni]
	Treg_002308	21	11	16	22	9	15	16	10	-2.16	1.05e-08	gi|256073873|ref|XP_002573252.1| hypothetical protein [Schistosoma mansoni]gi|360044746|emb|CCD82294.1| putative kif9 [Schistosoma mansoni]
	Treg_009406	132	82	83	117	72	91	80	56	-2.16	2.75e-23	gi|256073841|ref|XP_002573236.1| hypothetical protein [Schistosoma mansoni]gi|360044727|emb|CCD82275.1| hypothetical protein Smp_132040 [Schistosoma mansoni]
	Treg_002347	67	69	61	76	45	62	83	45	-2.16	6.33e-12	gi|226483453|emb|CAX74027.1| Protein archease [Schistosoma japonicum]
	Treg_006916	736	871	645	977	597	724	708	632	-2.15	1.35e-26	gi|56755583|gb|AAW25970.1| SJCHGC09379 protein [Schistosoma japonicum]
	Treg_016157	729	879.8	533.8	883	611.6	644	708.4	567.8	-2.15	2.28e-22	gi|56756477|gb|AAW26411.1| SJCHGC06378 protein [Schistosoma japonicum]gi|226468610|emb|CAX69982.1| hypothetical protein [Schistosoma japonicum]gi|226484760|emb|CAX74289.1| hypothetical protein [Schistosoma japonicum]
	Treg_000880	75.8	25.1	59.3	76.9	21.8	45.7	0	33	-2.15	0.000959	gi|56756324|gb|AAW26335.1| SJCHGC04198 protein [Schistosoma japonicum]
	Treg_002001	39.8	37.1	41.1	53.1	43.7	33.9	36.6	26.7	-2.15	1.12e-10	gi|256087313|ref|XP_002579816.1| hypothetical protein [Schistosoma mansoni]gi|353233275|emb|CCD80630.1| hypothetical protein Smp_169890 [Schistosoma mansoni]
	Treg_015325	610.8	569.5	344.7	619.4	400.1	628.7	493.9	520.4	-2.15	2.27e-20	gi|256074376|ref|XP_002573501.1| phospholipase [Schistosoma mansoni]
	Treg_007379	607	352	432	568	313	355	321	321	-2.15	2.31e-28	gi|226466542|emb|CAX69406.1| Mitochondrial substrate carrier,domain-containing protein [Schistosoma japonicum]
	Treg_014965	1416.4	2110.3	1065.1	1758.7	1296.2	1618.9	1858.9	1336.7	-2.14	9.71e-15	gi|56757978|gb|AAW27129.1| SJCHGC06305 protein [Schistosoma japonicum]
	Treg_000260	3978	4924	2315	3879	2134	2451	3133	1818	-2.14	2.47e-20	gi|76159841|gb|AAW26900.2| SJCHGC09468 protein [Schistosoma japonicum]gi|226476052|emb|CAX72116.1| Ribosomal protein LP1 [Schistosoma japonicum]gi|226476054|emb|CAX72117.1| Ribosomal protein LP1 [Schistosoma japonicum]gi|226476058|emb|CAX72119.1| Ribosomal protein LP1 [Schistosoma japonicum]gi|226480914|emb|CAX78922.1| Ribosomal protein LP1 [Schistosoma japonicum]gi|226480932|emb|CAX78931.1| Ribo…
	Treg_012327	50	63	45	51	29	58	65	29	-2.14	2.35e-08	gi|76154757|gb|AAX26178.2| SJCHGC09009 protein [Schistosoma japonicum]
	Treg_007622	5314	4182	3129	5235	1844	2345	2502	2076	-2.14	1.66e-23	gi|56756963|gb|AAW26653.1| SJCHGC06307 protein [Schistosoma japonicum]gi|119655849|gb|ABL86192.1| unknown [Schistosoma japonicum]gi|226470498|emb|CAX70529.1| hypotheticial protein [Schistosoma japonicum]gi|226470500|emb|CAX70530.1| hypotheticial protein [Schistosoma japonicum]
	Treg_001635	268	297	215	341	247	277	280	226	-2.14	1.23e-23	gi|556513870|emb|CDJ17089.1| WD repeat containing protein 74 [Echinococcus granulosus]
	Treg_001620	327	320	326	382	313	371	362	329	-2.14	2.81e-25	gi|353231198|emb|CCD77616.1| putative fatty-acid amide hydrolase [Schistosoma mansoni]
	Treg_001378	106	66	104	102	54	69	88	68	-2.14	1.66e-21	gi|349930639|dbj|GAA35033.1| hypothetical protein CLF_110442 [Clonorchis sinensis]
	Treg_003716	1119.2	1391.8	843.8	1329	842	937.3	1009.8	908.2	-2.14	1.65e-18	gi|339892264|gb|AEK21540.1| calmodulin B [Litopenaeus vannamei]
	Treg_001629	478	487	359	614	390	470	500	406	-2.14	3.17e-25	gi|256074523|ref|XP_002573574.1| ABC transporter [Schistosoma mansoni]gi|353229953|emb|CCD76124.1| putative abc1 family [Schistosoma mansoni]
	Treg_015681	1036	899	771	1344	643	705.1	745.1	588	-2.14	7.33e-23	gi|256071579|ref|XP_002572117.1| Syntaxin-12 [Schistosoma mansoni]gi|350645118|emb|CCD60179.1| Syntaxin-12, putative [Schistosoma mansoni]
	Treg_015232	660	85	1130	593.3	638	826	486	717	-2.14	0.000163	gi|110613444|gb|ABG78546.1| forkhead transcription factor [Schistosoma mansoni]gi|353233158|emb|CCD80513.1| hypothetical protein Smp_012010 [Schistosoma mansoni]
	Treg_009532	311.4	115.2	217.7	258.5	114	197.6	151	140.1	-2.13	2.29e-20	gi|353228594|emb|CCD74765.1| putative ephrin receptor [Schistosoma mansoni]
	Treg_005459	85	75.2	67.5	104.9	48.3	69.3	76.2	52.3	-2.13	8.14e-18	gi|256085594|ref|XP_002579002.1| zinc finger protein [Schistosoma mansoni]gi|353233177|emb|CCD80532.1| putative zinc finger protein [Schistosoma mansoni]
	Treg_011000	674	766	555	1051	216	272	277	219	-2.13	3.58e-19	gi|256078845|ref|XP_002575704.1| hypothetical protein [Schistosoma mansoni]gi|353232757|emb|CCD80112.1| hypothetical protein Smp_043650 [Schistosoma mansoni]
	Treg_000220	3782	5406	3416	4654	2891	3684	3491	2575	-2.13	6.45e-25	gi|226472284|emb|CAX77178.1| ribosomal protein L7a [Schistosoma japonicum]gi|226472286|emb|CAX77179.1| ribosomal protein L7a [Schistosoma japonicum]gi|226472288|emb|CAX77180.1| ribosomal protein L7a [Schistosoma japonicum]gi|226472290|emb|CAX77181.1| ribosomal protein L7a [Schistosoma japonicum]gi|226472292|emb|CAX77182.1| ribosomal protein L7a [Schistosoma japonicum]gi|226472294|emb|CAX77183.1| …
	Treg_000663	592	636	541	860	181	234	248	206	-2.12	5.97e-20	gi|256077555|ref|XP_002575068.1| hypothetical protein [Schistosoma mansoni]gi|360044107|emb|CCD81654.1| hypothetical protein Smp_142160 [Schistosoma mansoni]
	Treg_016631	478	572	399	537	361	488	492	412	-2.12	7.37e-19	gi|350644525|emb|CCD60760.1| thioredoxin domain containing protein 9-related [Schistosoma mansoni]
	Treg_016046	289.1	364.7	277.4	318.7	254.7	295.7	347.6	268.4	-2.12	6.53e-22	gi|76155267|gb|AAX26526.2| SJCHGC09040 protein [Schistosoma japonicum]
	Treg_016563	505	287	379	535	396	396	384	348	-2.12	2.84e-24	gi|358342131|dbj|GAA49668.1| ariadne-1 [Clonorchis sinensis]
	Treg_007325	2728	3721	2572	3396	1727	2017	2180	1516	-2.12	1.84e-26	gi|256069762|ref|XP_002571254.1| ribosomal protein S9 [Schistosoma mansoni]gi|238652401|emb|CAZ38939.1| ribosomal protein S9, putative [Schistosoma mansoni]
	Treg_001583	176.5	179.1	140.9	256.1	117.9	133	189.1	159.4	-2.11	1.48e-19	NO HIT
	Treg_002037	17	19	10	16	10	14	13	10	-2.11	4.12e-07	gi|226482500|emb|CAX73849.1| hypotheticial protein [Schistosoma japonicum]gi|226482502|emb|CAX73850.1| hypotheticial protein [Schistosoma japonicum]
	Treg_002780	36	19	27	56	17	19	13	14	-2.11	1.04e-13	NO HIT
	Treg_003784	1308.9	1643.4	956.3	1399.3	1235	1463.5	1502.5	1138.7	-2.11	3.03e-19	NO HIT
	Treg_003994	168.6	210.5	119	199.5	105.1	118.5	148.4	104.2	-2.11	1.47e-17	NO HIT
	Treg_001446	472	598	370	621	296	414	351	301	-2.11	8.19e-16	gi|56759070|gb|AAW27675.1| SJCHGC04497 protein [Schistosoma japonicum]
	Treg_001146	2298	3153	1934	2897	1506	1470	1632	1065	-2.11	1.8e-22	gi|257216408|emb|CAX82409.1| aspartate--ammonia ligase [Schistosoma japonicum]gi|257216452|emb|CAX82431.1| aspartate--ammonia ligase [Schistosoma japonicum]gi|257216458|emb|CAX82434.1| aspartate--ammonia ligase [Schistosoma japonicum]
	Treg_010255	648	570	522	775	517	649	617	551	-2.11	3.1e-26	gi|256086720|ref|XP_002579540.1| sporulation protein rmd5-related (glucose-induced degradation protein 2) [Schistosoma mansoni]
	Treg_000171	790.8	906.9	635.9	880.8	358.3	521.3	497.4	372.2	-2.11	3.76e-26	gi|256080875|ref|XP_002576701.1| Ribosome biogenesis protein NSA2 homologue [Schistosoma mansoni]gi|350644852|emb|CCD60446.1| Ribosome biogenesis protein NSA2 homologue [Schistosoma mansoni]
	Treg_002113	211	214	145	277	191	228	243	201	-2.11	4.91e-20	gi|256079212|ref|XP_002575883.1| hypothetical protein [Schistosoma mansoni]gi|353232731|emb|CCD80086.1| hypothetical protein Smp_045620.1 [Schistosoma mansoni]
	Treg_020649	528.8	1053.1	511.1	923.4	356.2	401.4	454.8	382.7	-2.11	2.02e-20	gi|226466955|emb|CAX75958.1| ubiquinol-cytochrome c reductase, Rieske iron-sulfur polypeptide 1 [Schistosoma japonicum]gi|226466957|emb|CAX75959.1| ubiquinol-cytochrome c reductase, Rieske iron-sulfur polypeptide 1 [Schistosoma japonicum]gi|226466959|emb|CAX75960.1| ubiquinol-cytochrome c reductase, Rieske iron-sulfur polypeptide 1 [Schistosoma japonicum]gi|226466961|emb|CAX75961.1| ubiquinol-cyt…
	Treg_000230	147	135.2	154	130	93.5	107.7	135.2	113.7	-2.11	1.81e-18	gi|226466508|emb|CAX69389.1| Diphthamide biosynthesis protein 2 [Schistosoma japonicum]
	Treg_007089	132.1	23.6	119.3	123.2	104.3	95.7	60.3	104.2	-2.1	1.27e-06	gi|56758158|gb|AAW27219.1| SJCHGC06288 protein [Schistosoma japonicum]
	Treg_003272	21.4	20.2	24.3	15.9	3	26.2	14.8	9.4	-2.1	0.000143	gi|353233176|emb|CCD80531.1| putative zinc finger protein [Schistosoma mansoni]
	Treg_014771	67.6	28.5	109.6	107.4	49.4	97.2	41.4	75.3	-2.1	8.81e-07	gi|256089379|ref|XP_002580788.1| hypothetical protein [Schistosoma mansoni]
	Treg_005380	569.6	356.8	553	660.5	389.2	499.1	406	479	-2.1	3.02e-24	gi|256088471|ref|XP_002580358.1| protein phosphatase pp2a regulatory subunit B [Schistosoma mansoni]gi|238665920|emb|CAZ36597.1| protein phosphatase pp2a regulatory subunit B,putative [Schistosoma mansoni]
	Treg_001504	93.9	140.1	67.3	127.8	72.8	96.9	124.3	75	-2.1	1.06e-10	gi|256084847|ref|XP_002578637.1| Isoamyl acetate-hydrolyzing esterase 1 [Schistosoma mansoni]gi|350645064|emb|CCD60246.1| Isoamyl acetate-hydrolyzing esterase 1 [Schistosoma mansoni]
	Treg_000781	39	14.2	20.8	25.6	22.1	13.3	11.2	22.7	-2.1	2.92e-06	gi|256080591|ref|XP_002576563.1| synaptotagmin [Schistosoma mansoni]
	Treg_005229	8	18	13	17	5	2	28	4	-2.09	0.00257	NO HIT
	Treg_001429	423.4	395.9	281.9	460.2	386.6	421.8	430.3	355	-2.09	3.27e-19	gi|425474|gb|AAA66476.1| SMDR1 [Schistosoma mansoni]
	Treg_002693	13.2	12.9	10.2	23.1	4.1	19.4	2.7	14.2	-2.09	5.04e-05	gi|353229601|emb|CCD75772.1| hypothetical protein Smp_092850.1 [Schistosoma mansoni]
	Treg_000720	2447.7	2940	1645	3410.6	1983	2486.6	2970.1	1762.7	-2.09	1.27e-14	gi|32187009|gb|AAP73467.1| neuronal nitric oxidse synthase protein inhibitor [Schistosoma japonicum]gi|226478632|emb|CAX72811.1| adenosinetriphosphatase [Schistosoma japonicum]
	Treg_008684	325	569	298	586	356	475	464	319	-2.09	5.33e-11	gi|256082518|ref|XP_002577502.1| hypothetical protein [Schistosoma mansoni]gi|350646347|emb|CCD58977.1| 12.5 kDa retinal tissue protein (Rtp12.5),putative [Schistosoma mansoni]
	Treg_008599	412	452	289	431	261	336	327	293	-2.09	1.18e-17	gi|256081099|ref|XP_002576811.1| tubulin-specific chaperone B (tubulin folding cofactor B) [Schistosoma mansoni]gi|353228499|emb|CCD74670.1| putative tubulin-specific chaperone B (tubulin folding cofactor B) [Schistosoma mansoni]
	Treg_008625	42.1	29.2	30.1	38.1	23.8	24.6	34	14	-2.09	4.85e-09	gi|226487996|emb|CAX75663.1| Nucleolar protein 5 [Schistosoma japonicum]
	Treg_000393	326	338	249	335	108	99	155	113	-2.09	2.92e-24	gi|226479966|emb|CAX73279.1| hypothetical protein [Schistosoma japonicum]
	Treg_000704	696.3	388.9	465.7	738.2	491.8	678.2	762	562.9	-2.08	1.6e-20	gi|256081505|ref|XP_002577010.1| adiponectin receptor [Schistosoma mansoni]gi|238662302|emb|CAZ33247.1| adiponectin receptor, putative [Schistosoma mansoni]
	Treg_017701	167	165	141	224	100	121	159	128	-2.08	1.03e-20	gi|56753039|gb|AAW24729.1| SJCHGC03759 protein [Schistosoma japonicum]
	Treg_009450	328	206	233	363	95	107	107	88	-2.08	3.19e-28	gi|358341392|dbj|GAA49086.1| hypothetical protein CLF_102466 [Clonorchis sinensis]
	Treg_007636	1113	1006	892	1490	877	1258	1138	1036	-2.08	5.46e-26	gi|350644228|emb|CCD61017.1| thioredoxin-like protein,putative [Schistosoma mansoni]
	Treg_001275	235	275	188	280	181	228	262	207	-2.08	1.02e-17	gi|256089309|ref|XP_002580754.1| DNA-directed rna polymerase II subunit [Schistosoma mansoni]gi|350646602|emb|CCD58722.1| DNA-directed rna polymerase II subunit,putative [Schistosoma mansoni]
	Treg_002338	44	33	47	50	38	39	43	31	-2.08	8.03e-14	gi|256081644|ref|XP_002577078.1| hypothetical protein [Schistosoma mansoni]gi|353232672|emb|CCD80027.1| hypothetical protein Smp_153300 [Schistosoma mansoni]
	Treg_000030	45.1	47.1	19	39	32.1	37.1	42	22	-2.07	1.49e-06	NO HIT
	Treg_003700	1695.3	1458	1208.5	2071.5	1445.8	1720.4	1688.8	1357.4	-2.07	8.2e-24	gi|358254937|dbj|GAA56614.1| four and a half LIM domains protein 2 [Clonorchis sinensis]
	Treg_006961	3247.2	1624.2	2279.5	3176.8	1719	2129	2280.7	1990.7	-2.07	7.8e-23	gi|256074386|ref|XP_002573506.1| low-density lipoprotein receptor (ldl) [Schistosoma mansoni]
	Treg_015113	264.8	144.1	202.3	264.1	142.9	182.3	227.1	179.5	-2.07	7.55e-24	gi|358334863|dbj|GAA53282.1| NAD+ synthase (glutamine-hydrolysing) [Clonorchis sinensis]
	Treg_001589	93.4	110	68.6	107.9	82.9	88.4	95.1	69.2	-2.07	1.77e-13	gi|56756096|gb|AAW26226.1| SJCHGC05513 protein [Schistosoma japonicum]
	Treg_002435	23	35	18	41	19	20	18	19	-2.07	1.17e-06	gi|256074801|ref|XP_002573711.1| thyrotropin-releasing hormone receptor [Schistosoma mansoni]gi|360043859|emb|CCD81405.1| putative thyrotropin-releasing hormone receptor [Schistosoma mansoni]
	Treg_015577	182	329.6	191.8	273.1	198.1	229.8	321.1	200.4	-2.07	4.09e-13	gi|256072296|ref|XP_002572472.1| suppression of tumorigenicity [Schistosoma mansoni]
	Treg_012156	130.9	67.5	100.7	178.5	49.4	149.6	113.1	96.4	-2.07	9.4e-13	gi|226487460|emb|CAX74600.1| putative Feline leukemia virus subgroup C receptor-related protein 1 [Schistosoma japonicum]
	Treg_000113	1934.4	1809.7	1416.6	2211.1	1590.6	1974.6	1953.6	1743.8	-2.06	1.98e-23	gi|56755693|gb|AAW26025.1| SJCHGC09425 protein [Schistosoma japonicum]gi|226469414|emb|CAX76537.1| putative Vesicle-associated membrane protein-associated protein A [Schistosoma japonicum]
	Treg_001347	319	374	230	350	265	328	320	260	-2.06	5.28e-16	gi|56755235|gb|AAW25797.1| SJCHGC05947 protein [Schistosoma japonicum]
	Treg_004657	53	79	42	47	39	49	53	56	-2.06	1.99e-07	NO HIT
	Treg_000629	602.5	251.4	422	624.6	277.8	357.3	339.4	317.4	-2.06	6.14e-22	gi|84626106|gb|ABC59625.1| cytosolic 5'-nucleotidase II [Schistosoma japonicum]
	Treg_008314	415	160	509	448	305	422	308	335	-2.06	2.41e-11	gi|353230516|emb|CCD76687.1| hypothetical protein Smp_000780 [Schistosoma mansoni]
	Treg_016424	221	244	163	272	226	243	252	241	-2.06	1.27e-19	gi|29841039|gb|AAP06052.1| similar to GenBank Accession Number BC015795 hypothetical protein FLJ20457 in Homo sapiens; hypothetical protein FLJ20457 in Homo sapiens [Schistosoma japonicum]
	Treg_006829	5633	5674	4331	6710	4350	5028	5486	4288	-2.06	1.36e-11	gi|256078423|ref|XP_002575495.1| hypothetical protein [Schistosoma mansoni]gi|350645929|emb|CCD59394.1| 14-3-3 protein, putative [Schistosoma mansoni]
	Treg_015761	213	73	146	317	174	190	188	201	-2.06	1.15e-10	gi|256052072|ref|XP_002569603.1| hypothetical protein [Schistosoma mansoni]
	Treg_005845	70.8	81.9	58.9	89.5	67.2	82.8	86.6	43.7	-2.05	3.32e-10	gi|76152644|gb|AAX24328.2| SJCHGC05542 protein [Schistosoma japonicum]
	Treg_008269	772	266	588	772	402	519	417	445	-2.05	7.84e-17	gi|256071156|ref|XP_002571907.1| dihydropyridine-sensitive l-type calcium channel [Schistosoma mansoni]
	Treg_020820	1093	315	1129.3	1168	754	1046.2	715.4	877	-2.05	1.92e-09	gi|256052881|ref|XP_002569977.1| ell related [Schistosoma mansoni]
	Treg_001031	617	653	492	671	491	565	597	501	-2.05	6.93e-17	gi|256052709|ref|XP_002569896.1| adenylate cyclase [Schistosoma mansoni]
	Treg_009423	113.7	145.9	102.2	154.7	135.5	133.7	155	130	-2.05	3.83e-14	gi|226480566|emb|CAX73380.1| HIRA interacting protein 5 [Schistosoma japonicum]gi|226480792|emb|CAX73493.1| HIRA interacting protein 5 [Schistosoma japonicum]
	Treg_006686	6186.5	3954.4	4111.7	6628.5	3654.2	4444.1	4186.2	4057.9	-2.05	5.2e-24	gi|15824396|gb|AAL09322.1|AF303222_1 SNaK1 [Schistosoma mansoni]
	Treg_000189	4378	4449.6	2458	4829.9	2671	3343	2808	2410.9	-2.04	2.18e-20	NO HIT
	Treg_001286	23.4	21.4	12.5	51.8	30.2	7.5	24.1	23.9	-2.04	0.000128	gi|353232927|emb|CCD80282.1| hypothetical protein Smp_074410 [Schistosoma mansoni]
	Treg_002336	140	166	129	218	170	178	197	151	-2.04	3.27e-16	gi|56757455|gb|AAW26895.1| SJCHGC07338 protein [Schistosoma japonicum]gi|226466640|emb|CAX69455.1| Mitochondrial 28S ribosomal protein S6 [Schistosoma japonicum]
	Treg_006077	646.1	385.6	511.2	715.8	532.3	477.1	546.8	482.7	-2.04	5.46e-21	gi|256071801|ref|XP_002572227.1| trans-golgi protein gmx33-related [Schistosoma mansoni]gi|360043117|emb|CCD78529.1| trans-golgi protein gmx33-related [Schistosoma mansoni]
	Treg_007951	70.8	33	85.3	116.3	53.5	52.4	53	84.5	-2.04	1.5e-07	NO HIT
	Treg_014447	2593	2872	1262	2363	1927	2272	2669	1555	-2.04	5.36e-15	NO HIT
	Treg_001153	72.2	74.5	70.8	43.5	44.2	55.8	47.8	46	-2.04	1.73e-09	gi|226489214|emb|CAX75751.1| Upstream activation factor subunit UAF30 [Schistosoma japonicum]
	Treg_007958	161	185	130	182	122	134	137	120	-2.03	3.29e-18	gi|56753105|gb|AAW24762.1| SJCHGC04453 protein [Schistosoma japonicum]
	Treg_011182	116	141	95	174	138	147	156	116	-2.03	7.99e-14	gi|360044821|emb|CCD82369.1| hypothetical protein Smp_025340 [Schistosoma mansoni]
	Treg_003858	521	700	493	745	611	748	858	626	-2.03	3.83e-15	gi|350645786|emb|CCD59548.1| hypothetical protein Smp_097620 [Schistosoma mansoni]
	Treg_006250	7.7	4.4	10.1	8	6.9	8	4.2	12.1	-2.03	1.9e-05	gi|256075919|ref|XP_002574263.1| hypothetical protein [Schistosoma mansoni]gi|353229526|emb|CCD75697.1| hypothetical protein Smp_028170.1 [Schistosoma mansoni]
	Treg_000572	65.1	51	29.7	53.4	32.6	98.1	6.7	37.4	-2.03	0.000841	gi|226484740|emb|CAX74279.1| Major egg antigen (p40) [Schistosoma japonicum]
	Treg_000545	128.8	142.9	90.7	129.7	86.9	136.9	136.7	104.6	-2.02	1.29e-13	gi|56759416|gb|AAW27848.1| SJCHGC05270 protein [Schistosoma japonicum]
	Treg_001406	1215.6	716.6	1039.7	1471	1000.4	1224.5	1127.7	990.2	-2.02	1.11e-20	gi|256073843|ref|XP_002573237.1| ran binding protein 9-related [Schistosoma mansoni]
	Treg_004722	187	182	156	200	170	184	206	164	-2.02	4.24e-21	gi|226470092|emb|CAX70327.1| queuine tRNA-ribosyltransferase domain containing 1 [Schistosoma japonicum]
	Treg_017830	746	504	452	791	196	263	229	193	-2.02	8.01e-23	gi|226479952|emb|CAX73272.1| Tegumental protein [Schistosoma japonicum]
	Treg_003725	85.9	88.4	66.9	98.3	80.4	62.8	74.7	59.7	-2.02	2.01e-14	gi|56755763|gb|AAW26060.1| SJCHGC05185 protein [Schistosoma japonicum]
	Treg_000526	542	268.5	417	684.7	352	433	415	417	-2.02	2.16e-21	gi|358255061|dbj|GAA56762.1| AP2-associated kinase [Clonorchis sinensis]
	Treg_000625	4075	5852	3345	5458	3732	4299	4656	3420	-2.02	9.63e-20	gi|256089992|ref|XP_002581015.1| receptor for activated PKC [Schistosoma mansoni]gi|19071249|gb|AAL84173.1|AF422164_1 receptor for activated PKC [Schistosoma mansoni]gi|238666784|emb|CAZ37254.1| receptor for activated PKC, putative [Schistosoma mansoni]
	Treg_001189	1117	984	806	1367	308	380	401	398	-2.02	1.8e-19	gi|256087417|ref|XP_002579866.1| retinaldehyde binding protein-related [Schistosoma mansoni]
	Treg_007251	3070	2564	2214	3942	2191	2709	2713	2249	-2.02	1.11e-20	gi|256074720|ref|XP_002573671.1| glucose-6-phosphate isomerase [Schistosoma mansoni]gi|360043735|emb|CCD81281.1| putative glucose-6-phosphate isomerase [Schistosoma mansoni]
	Treg_003878	905	610	684	943	771	943	997	819	-2.02	1.14e-23	gi|256053072|ref|XP_002570033.1| hypothetical protein [Schistosoma mansoni]
	Treg_000865	146	194	116	214	99	174	134	127	-2.01	6.61e-15	gi|56754865|gb|AAW25615.1| SJCHGC04693 protein [Schistosoma japonicum]
	Treg_003842	62.3	13.6	59.1	73.6	20.6	47	69.1	33	-2.01	1.37e-05	gi|256077076|ref|XP_002574834.1| hypothetical protein [Schistosoma mansoni]gi|350646483|emb|CCD58882.1| hypothetical protein Smp_033870 [Schistosoma mansoni]
	Treg_015478	4375	5813	3543	5269	3871	4510	4886	3317	-2.01	1.57e-21	gi|226467131|emb|CAX76046.1| putative ribosomal protein L4 [Schistosoma japonicum]gi|226467137|emb|CAX76049.1| putative ribosomal protein L4 [Schistosoma japonicum]
	Treg_015467	1012	1502	811	1580	1127	1302	1412	1095	-2.01	1.4e-14	gi|56755281|gb|AAW25820.1| SJCHGC05603 protein [Schistosoma japonicum]gi|226466678|emb|CAX69474.1| NADH dehydrogenase [Schistosoma japonicum]
	Treg_005990	37.9	7.7	30.8	28.2	5.3	45.2	0	20.4	-2.01	0.00509	gi|353229944|emb|CCD76115.1| neuronal differentiation protein [Schistosoma mansoni]
	Treg_003667	64	57.4	83.9	109.5	50.7	70.3	41.3	64.9	-2.01	6.08e-11	gi|257215898|emb|CAX83101.1| RNA-binding protein 5 [Schistosoma japonicum]
	Treg_001828	303	438	248.1	352	195.4	325.7	293.3	212.7	-2.01	1.09e-12	gi|256082777|ref|XP_002577629.1| n-acetyltransferase mak3 [Schistosoma mansoni]gi|353230214|emb|CCD76385.1| putative n-acetyltransferase mak3 [Schistosoma mansoni]
	Treg_010902	113.2	53.9	90.9	107.1	85.1	85.9	65.4	79.1	-2.01	2.87e-15	gi|256053015|ref|XP_002570009.1| hepatocellular carcinoma-associated antigen [Schistosoma mansoni]
	Treg_001948	746	709	543	759	770	810	840	777	-2	2.48e-20	gi|257205926|emb|CAX82614.1| carboxypeptidase N, polypeptide 1, 50kD [Schistosoma japonicum]
	Treg_001228	549	483	371	682	443	509	507	426	-2	3.63e-21	gi|256073089|ref|XP_002572865.1| selectively expressed in embryonic epithelia protein-1 [Schistosoma mansoni]gi|350646426|emb|CCD58923.1| selectively expressed in embryonic epithelia protein-1 , putative [Schistosoma mansoni]
	Treg_001206	208	255	162	255	79	116	90	82	-2	1.07e-17	gi|256070401|ref|XP_002571531.1| isochorismatase family protein [Schistosoma mansoni]gi|350645328|emb|CCD59951.1| isochorismatase family protein, putative [Schistosoma mansoni]
	Treg_000234	1405		1113	1757	962	1166	1065	1063	-2	8.07e-24	gi|226480806|emb|CAX73500.1| Phosphatidylinositol transfer protein alpha isoform [Schistosoma japonicum]
