# Supplementary material for: Comparative Transcriptomic Exploration Reveals Unique Molecular Adaptations of Neuropathogenic Trichobilharzia to Invade and Parasitize Its Avian Definitive Host
Source: PLoS Negl Trop Dis. 2016 Feb 10;10(2):e0004406. doi: 10.1371/journal.pntd.0004406 (PMC4749378; doi:10.1371/journal.pntd.0004406)
Supplement: S11 Table — Transcripts uniquely transcribed in the schistosomulum are marked with an asterisk. (XLSX) [file pntd.0004406.s011.xlsx]

## Sheet: S 11
S11 Table. Summary of transcripts enriched in the schistosomulum stage of Trichobilharzia regenti based on Kyoto Encyclopedia of Genes and Genomes (KEGG) BRITE/pathway and gene ontology (GO) classifications. Transcripts uniquely transcribed in the schistosomulum are marked with an asterisk.
	Number of transcripts	Number of EC numbers	KEGG annotation	Transcript ID	Unique transcripts
Metabolism
KEGG pathways	36	6
carbohydrate metabolism;Amino sugar and nucleotide sugar metabolism (ko00520 )	32	3
			hexosaminidase [EC:3.2.1.52]	Treg_001840
			hexosaminidase [EC:3.2.1.52]	Treg_006008	*
			hexosaminidase [EC:3.2.1.52]	Treg_006302
			hexosaminidase [EC:3.2.1.52]	Treg_006310
			hexosaminidase [EC:3.2.1.52]	Treg_006640
			hexosaminidase [EC:3.2.1.52]	Treg_007118	*
			hexosaminidase [EC:3.2.1.52]	Treg_008394	*
			hexosaminidase [EC:3.2.1.52]	Treg_008735
			hexosaminidase [EC:3.2.1.52]	Treg_009625	*
			hexosaminidase [EC:3.2.1.52]	Treg_009837	*
			hexosaminidase [EC:3.2.1.52]	Treg_011272	*
			hexosaminidase [EC:3.2.1.52]	Treg_013277	*
			hexosaminidase [EC:3.2.1.52]	Treg_014789
			hexosaminidase [EC:3.2.1.52]	Treg_015005
			hexosaminidase [EC:3.2.1.52]	Treg_015078	*
			hexosaminidase [EC:3.2.1.52]	Treg_015334	*
			hexosaminidase [EC:3.2.1.52]	Treg_015335	*
			hexosaminidase [EC:3.2.1.52]	Treg_015336	*
			hexosaminidase [EC:3.2.1.52]	Treg_015398	*
			hexosaminidase [EC:3.2.1.52]	Treg_015400	*
			hexosaminidase [EC:3.2.1.52]	Treg_015937	*
			hexosaminidase [EC:3.2.1.52]	Treg_015938	*
			hexosaminidase [EC:3.2.1.52]	Treg_016910	*
			hexosaminidase [EC:3.2.1.52]	Treg_017067	*
			hexosaminidase [EC:3.2.1.52]	Treg_017288
			hexosaminidase [EC:3.2.1.52]	Treg_018604
			hexosaminidase [EC:3.2.1.52]	Treg_020191	*
			hexosaminidase [EC:3.2.1.52]	Treg_020246	*
			hexosaminidase [EC:3.2.1.52]	Treg_020390	*
			hexosaminidase [EC:3.2.1.52]	Treg_020391	*
			phosphoglucomutase [EC:5.4.2.2]	Treg_020253
			UDPglucose 6-dehydrogenase [EC:1.1.1.22]	Treg_010235
glycan biosynthesis and metabolism;Glycosaminoglycan degradation (ko00531)	32	2
			beta-galactosidase [EC:3.2.1.23]	Treg_015412
			beta-galactosidase [EC:3.2.1.23]	Treg_016592
			hexosaminidase [EC:3.2.1.52]	Treg_001840
			hexosaminidase [EC:3.2.1.52]	Treg_006008	*
			hexosaminidase [EC:3.2.1.52]	Treg_006302
			hexosaminidase [EC:3.2.1.52]	Treg_006310
			hexosaminidase [EC:3.2.1.52]	Treg_006640
			hexosaminidase [EC:3.2.1.52]	Treg_007118	*
			hexosaminidase [EC:3.2.1.52]	Treg_008394	*
			hexosaminidase [EC:3.2.1.52]	Treg_008735
			hexosaminidase [EC:3.2.1.52]	Treg_009625	*
			hexosaminidase [EC:3.2.1.52]	Treg_009837	*
			hexosaminidase [EC:3.2.1.52]	Treg_011272	*
			hexosaminidase [EC:3.2.1.52]	Treg_013277	*
			hexosaminidase [EC:3.2.1.52]	Treg_014789
			hexosaminidase [EC:3.2.1.52]	Treg_015005
			hexosaminidase [EC:3.2.1.52]	Treg_015078	*
			hexosaminidase [EC:3.2.1.52]	Treg_015334	*
			hexosaminidase [EC:3.2.1.52]	Treg_015335
			hexosaminidase [EC:3.2.1.52]	Treg_015336	*
			hexosaminidase [EC:3.2.1.52]	Treg_015398	*
			hexosaminidase [EC:3.2.1.52]	Treg_015400	*
			hexosaminidase [EC:3.2.1.52]	Treg_015937	*
			hexosaminidase [EC:3.2.1.52]	Treg_015938	*
			hexosaminidase [EC:3.2.1.52]	Treg_016910	*
			hexosaminidase [EC:3.2.1.52]	Treg_017067	*
			hexosaminidase [EC:3.2.1.52]	Treg_017288
			hexosaminidase [EC:3.2.1.52]	Treg_018604
			hexosaminidase [EC:3.2.1.52]	Treg_020191	*
			hexosaminidase [EC:3.2.1.52]	Treg_020246	*
			hexosaminidase [EC:3.2.1.52]	Treg_020390	*
			hexosaminidase [EC:3.2.1.52]	Treg_020391	*
glycan biosynthesis and metabolism;Glycosphingolipid biosynthesis - ganglio series (ko00604)	33	3
			beta-galactosidase [EC:3.2.1.23]	Treg_015412
			beta-galactosidase [EC:3.2.1.23]	Treg_016592
			hexosaminidase [EC:3.2.1.52]	Treg_001840
			hexosaminidase [EC:3.2.1.52]	Treg_006008	*
			hexosaminidase [EC:3.2.1.52]	Treg_006302
			hexosaminidase [EC:3.2.1.52]	Treg_006310
			hexosaminidase [EC:3.2.1.52]	Treg_006640
			hexosaminidase [EC:3.2.1.52]	Treg_007118	*
			hexosaminidase [EC:3.2.1.52]	Treg_008394	*
			hexosaminidase [EC:3.2.1.52]	Treg_008735
			hexosaminidase [EC:3.2.1.52]	Treg_009625	*
			hexosaminidase [EC:3.2.1.52]	Treg_009837	*
			hexosaminidase [EC:3.2.1.52]	Treg_011272	*
			hexosaminidase [EC:3.2.1.52]	Treg_013277	*
			hexosaminidase [EC:3.2.1.52]	Treg_014789
			hexosaminidase [EC:3.2.1.52]	Treg_015005
			hexosaminidase [EC:3.2.1.52]	Treg_015078	*
			hexosaminidase [EC:3.2.1.52]	Treg_015334	*
			hexosaminidase [EC:3.2.1.52]	Treg_015335
			hexosaminidase [EC:3.2.1.52]	Treg_015336	*
			hexosaminidase [EC:3.2.1.52]	Treg_015398	*
			hexosaminidase [EC:3.2.1.52]	Treg_015400	*
			hexosaminidase [EC:3.2.1.52]	Treg_015937	*
			hexosaminidase [EC:3.2.1.52]	Treg_015938	*
			hexosaminidase [EC:3.2.1.52]	Treg_016910	*
			hexosaminidase [EC:3.2.1.52]	Treg_017067	*
			hexosaminidase [EC:3.2.1.52]	Treg_017288
			hexosaminidase [EC:3.2.1.52]	Treg_018604
			hexosaminidase [EC:3.2.1.52]	Treg_020191	*
			hexosaminidase [EC:3.2.1.52]	Treg_020246	*
			hexosaminidase [EC:3.2.1.52]	Treg_020390	*
			hexosaminidase [EC:3.2.1.52]	Treg_020391	*
			MFS transporter, PAT family, solute carrier family 33 (acetyl-CoA transportor), member 1 [EC:2.3.1.-]	Treg_011145
glycan biosynthesis and metabolism;Glycosphingolipid biosynthesis - globo series (ko00603)	30	1
			hexosaminidase [EC:3.2.1.52]	Treg_001840
			hexosaminidase [EC:3.2.1.52]	Treg_006008	*
			hexosaminidase [EC:3.2.1.52]	Treg_006302
			hexosaminidase [EC:3.2.1.52]	Treg_006310
			hexosaminidase [EC:3.2.1.52]	Treg_006640
			hexosaminidase [EC:3.2.1.52]	Treg_007118	*
			hexosaminidase [EC:3.2.1.52]	Treg_008394	*
			hexosaminidase [EC:3.2.1.52]	Treg_008735
			hexosaminidase [EC:3.2.1.52]	Treg_009625	*
			hexosaminidase [EC:3.2.1.52]	Treg_009837	*
			hexosaminidase [EC:3.2.1.52]	Treg_011272	*
			hexosaminidase [EC:3.2.1.52]	Treg_013277	*
			hexosaminidase [EC:3.2.1.52]	Treg_014789
			hexosaminidase [EC:3.2.1.52]	Treg_015005
			hexosaminidase [EC:3.2.1.52]	Treg_015078	*
			hexosaminidase [EC:3.2.1.52]	Treg_015334	*
			hexosaminidase [EC:3.2.1.52]	Treg_015335
			hexosaminidase [EC:3.2.1.52]	Treg_015336	*
			hexosaminidase [EC:3.2.1.52]	Treg_015398	*
			hexosaminidase [EC:3.2.1.52]	Treg_015400	*
			hexosaminidase [EC:3.2.1.52]	Treg_015937	*
			hexosaminidase [EC:3.2.1.52]	Treg_015938	*
			hexosaminidase [EC:3.2.1.52]	Treg_016910	*
			hexosaminidase [EC:3.2.1.52]	Treg_017067	*
			hexosaminidase [EC:3.2.1.52]	Treg_017288
			hexosaminidase [EC:3.2.1.52]	Treg_018604
			hexosaminidase [EC:3.2.1.52]	Treg_020191	*
			hexosaminidase [EC:3.2.1.52]	Treg_020246	*
			hexosaminidase [EC:3.2.1.52]	Treg_020390	*
			hexosaminidase [EC:3.2.1.52]	Treg_020391	*
glycan biosynthesis and metabolism;Other glycan degradation (ko00511)	33	3
			beta-galactosidase [EC:3.2.1.23]	Treg_015412
			beta-galactosidase [EC:3.2.1.23]	Treg_016592
			hexosaminidase [EC:3.2.1.52]	Treg_001840
			hexosaminidase [EC:3.2.1.52]	Treg_006008	*
			hexosaminidase [EC:3.2.1.52]	Treg_006302
			hexosaminidase [EC:3.2.1.52]	Treg_006310
			hexosaminidase [EC:3.2.1.52]	Treg_006640
			hexosaminidase [EC:3.2.1.52]	Treg_007118	*
			hexosaminidase [EC:3.2.1.52]	Treg_008394	*
			hexosaminidase [EC:3.2.1.52]	Treg_008735
			hexosaminidase [EC:3.2.1.52]	Treg_009625	*
			hexosaminidase [EC:3.2.1.52]	Treg_009837	*
			hexosaminidase [EC:3.2.1.52]	Treg_011272	*
			hexosaminidase [EC:3.2.1.52]	Treg_013277	*
			hexosaminidase [EC:3.2.1.52]	Treg_014789
			hexosaminidase [EC:3.2.1.52]	Treg_015005
			hexosaminidase [EC:3.2.1.52]	Treg_015078	*
			hexosaminidase [EC:3.2.1.52]	Treg_015334	*
			hexosaminidase [EC:3.2.1.52]	Treg_015335
			hexosaminidase [EC:3.2.1.52]	Treg_015336	*
			hexosaminidase [EC:3.2.1.52]	Treg_015398	*
			hexosaminidase [EC:3.2.1.52]	Treg_015400	*
			hexosaminidase [EC:3.2.1.52]	Treg_015937	*
			hexosaminidase [EC:3.2.1.52]	Treg_015938	*
			hexosaminidase [EC:3.2.1.52]	Treg_016910	*
			hexosaminidase [EC:3.2.1.52]	Treg_017067	*
			hexosaminidase [EC:3.2.1.52]	Treg_017288
			hexosaminidase [EC:3.2.1.52]	Treg_018604
			hexosaminidase [EC:3.2.1.52]	Treg_020191	*
			hexosaminidase [EC:3.2.1.52]	Treg_020246	*
			hexosaminidase [EC:3.2.1.52]	Treg_020390	*
			hexosaminidase [EC:3.2.1.52]	Treg_020391	*
			N4-(beta-N-acetylglucosaminyl)-L-asparaginase [EC:3.5.1.26]	Treg_017190
KEGG protein class	76	45
peptidases (ko01002)	61	31
			20S proteasome subunit alpha 4 [EC:3.4.25.1]	Treg_017827
			abhydrolase domain-containing protein 5 [EC:2.3.1.51]	Treg_009624
			a disintegrin and metalloproteinase with thrombospondin motifs 3 [EC:3.4.24.-]	Treg_011349
			a disintegrin and metalloproteinase with thrombospondin motifs 9 [EC:3.4.24.-]	Treg_015230
			aspartyl aminopeptidase [EC:3.4.11.21]	Treg_009301
			calpain-5 [EC:3.4.22.-]	Treg_011932
			calpain, invertebrate [EC:3.4.22.-]	Treg_007035
			carbamoyl-phosphate synthase / aspartate carbamoyltransferase / dihydroorotase [EC:6.3.5.5 2.1.3.2 3.5.2.3]	Treg_007032
			caspase 7 [EC:3.4.22.60]	Treg_017988
			cathepsin A (carboxypeptidase C) [EC:3.4.16.5]	Treg_006421
			cathepsin A (carboxypeptidase C) [EC:3.4.16.5]	Treg_007404
			cathepsin B [EC:3.4.22.1]	Treg_004279
			cathepsin B [EC:3.4.22.1]	Treg_006318
			cathepsin B [EC:3.4.22.1]	Treg_006320
			cathepsin B [EC:3.4.22.1]	Treg_006625
			cathepsin B [EC:3.4.22.1]	Treg_014534
			cathepsin B [EC:3.4.22.1]	Treg_014792
			cathepsin B [EC:3.4.22.1]	Treg_015294	*
			cathepsin B [EC:3.4.22.1]	Treg_015853	*
			cathepsin B [EC:3.4.22.1]	Treg_018303	*
			cathepsin B [EC:3.4.22.1]	Treg_020247	*
			cathepsin B [EC:3.4.22.1]	Treg_020667
			cathepsin C [EC:3.4.14.1]	Treg_005998
			cathepsin C [EC:3.4.14.1]	Treg_014726
			cathepsin C [EC:3.4.14.1]	Treg_015137
			cathepsin D [EC:3.4.23.5]	Treg_007039	*
			cathepsin D [EC:3.4.23.5]	Treg_007041	*
			cathepsin D [EC:3.4.23.5]	Treg_007274	*
			cathepsin D [EC:3.4.23.5]	Treg_009554	*
			cathepsin D [EC:3.4.23.5]	Treg_015703	*
			cathepsin D [EC:3.4.23.5]	Treg_015707
			cathepsin D [EC:3.4.23.5]	Treg_017006	*
			cathepsin D [EC:3.4.23.5]	Treg_018267	*
			cathepsin F [EC:3.4.22.41]	Treg_008596
			cathepsin K [EC:3.4.22.38]	Treg_006792
			cathepsin L [EC:3.4.22.15]	Treg_006336
			cathepsin L [EC:3.4.22.15]	Treg_006337
			cathepsin S [EC:3.4.22.27]	Treg_012387
			dipeptidyl-peptidase II [EC:3.4.14.2]	Treg_006438
			dipeptidyl-peptidase III [EC:3.4.14.4]	Treg_020272
			disintegrin and metalloproteinase domain-containing protein 1 [EC:3.4.24.-]	Treg_005814
			endothelin-converting enzyme [EC:3.4.24.71]	Treg_016613
			GMP synthase (glutamine-hydrolysing) [EC:6.3.5.2]	Treg_004761
			GMP synthase (glutamine-hydrolysing) [EC:6.3.5.2]	Treg_008573
			legumain [EC:3.4.22.34]	Treg_006584	*
			legumain [EC:3.4.22.34]	Treg_008970	*
			legumain [EC:3.4.22.34]	Treg_015036
			leishmanolysin-like peptidase [EC:3.4.24.-]	Treg_011566
			leishmanolysin-like peptidase [EC:3.4.24.-]	Treg_013316
			leucyl aminopeptidase [EC:3.4.11.1]	Treg_015017
			leucyl aminopeptidase [EC:3.4.11.1]	Treg_015018
			leucyl aminopeptidase [EC:3.4.11.1]	Treg_015019
			lysosomal Pro-X carboxypeptidase [EC:3.4.16.2]	Treg_007329
			mitochondrial-processing peptidase subunit beta [EC:3.4.24.64]	Treg_007470
			separase [EC:3.4.22.49]	Treg_005158
			separase [EC:3.4.22.49]	Treg_007192
			separase [EC:3.4.22.49]	Treg_007194
			separase [EC:3.4.22.49]	Treg_015602
			taspase, threonine aspartase, 1 [EC:3.4.25.-]	Treg_009914
			tissue plasminogen activator [EC:3.4.21.68]	Treg_006444
			tolkin [EC:3.4.24.-]	Treg_006431
heparan sulfate/heparin binding proteins (ko00536)	22	11
			amyloid beta A4 protein	Treg_014940
			cathepsin B [EC:3.4.22.1]	Treg_004279
			cathepsin B [EC:3.4.22.1]	Treg_006318
			cathepsin B [EC:3.4.22.1]	Treg_006320
			cathepsin B [EC:3.4.22.1]	Treg_006625
			cathepsin B [EC:3.4.22.1]	Treg_014534
			cathepsin B [EC:3.4.22.1]	Treg_014792
			cathepsin B [EC:3.4.22.1]	Treg_015294	*
			cathepsin B [EC:3.4.22.1]	Treg_015853	*
			cathepsin B [EC:3.4.22.1]	Treg_018303	*
			cathepsin B [EC:3.4.22.1]	Treg_020247	*
			cathepsin B [EC:3.4.22.1]	Treg_020667
			collagen, type I/II/III/V/XI/XXIV/XXVII, alpha	Treg_007709
			collagen, type VI, alpha	Treg_008130	*
			fibroblast growth factor receptor 2 [EC:2.7.10.1]	Treg_010906
			fibroblast growth factor receptor 2 [EC:2.7.10.1]	Treg_011179
			netrin 1	Treg_008890
			neural cell adhesion molecule	Treg_007831
			slit 1	Treg_008821
			tissue plasminogen activator [EC:3.4.21.68]	Treg_006444
			wingless-type MMTV integration site family, member 16	Treg_018440
			wingless-type MMTV integration site family, member 5	Treg_009905
Proteoglycans (ko00535)	6	6
			agrin	Treg_006322
			amyloid beta A4 protein	Treg_014940
			glypican 1	Treg_017005
			glypican 5	Treg_010474
			structural maintenance of chromosome 3 (chondroitin sulfate proteoglycan 6)	Treg_004466
			syndecan 2	Treg_017641
KEGG protein class	55	12
chaperones and folding catalysts (ko03110)	55	12
			calnexin	Treg_007482
			cathepsin A (carboxypeptidase C) [EC:3.4.16.5]	Treg_006421
			cathepsin A (carboxypeptidase C) [EC:3.4.16.5]	Treg_007404
			cathepsin B [EC:3.4.22.1]	Treg_004279
			cathepsin B [EC:3.4.22.1]	Treg_006318
			cathepsin B [EC:3.4.22.1]	Treg_006320
			cathepsin B [EC:3.4.22.1]	Treg_006625
			cathepsin B [EC:3.4.22.1]	Treg_014534
			cathepsin B [EC:3.4.22.1]	Treg_014792
			cathepsin B [EC:3.4.22.1]	Treg_015294	*
			cathepsin B [EC:3.4.22.1]	Treg_015853	*
			cathepsin B [EC:3.4.22.1]	Treg_018303	*
			cathepsin B [EC:3.4.22.1]	Treg_020247	*
			cathepsin B [EC:3.4.22.1]	Treg_020667
			cathepsin C [EC:3.4.14.1]	Treg_005998
			cathepsin C [EC:3.4.14.1]	Treg_014726
			cathepsin C [EC:3.4.14.1]	Treg_015137
			cathepsin K [EC:3.4.22.38]	Treg_006792
			cathepsin L [EC:3.4.22.15]	Treg_006336
			cathepsin L [EC:3.4.22.15]	Treg_006337
			cathepsin S [EC:3.4.22.27]	Treg_012387
			DnaJ homolog subfamily B member 11	Treg_002234
			E3 SUMO-protein ligase RanBP2	Treg_001609
			hexosaminidase [EC:3.2.1.52]	Treg_001840
			hexosaminidase [EC:3.2.1.52]	Treg_006008	*
			hexosaminidase [EC:3.2.1.52]	Treg_006302
			hexosaminidase [EC:3.2.1.52]	Treg_006310
			hexosaminidase [EC:3.2.1.52]	Treg_006640
			hexosaminidase [EC:3.2.1.52]	Treg_007118	*
			hexosaminidase [EC:3.2.1.52]	Treg_008394	*
			hexosaminidase [EC:3.2.1.52]	Treg_008735
			hexosaminidase [EC:3.2.1.52]	Treg_009625	*
			hexosaminidase [EC:3.2.1.52]	Treg_009837	*
			hexosaminidase [EC:3.2.1.52]	Treg_011272	*
			hexosaminidase [EC:3.2.1.52]	Treg_013277	*
			hexosaminidase [EC:3.2.1.52]	Treg_014789
			hexosaminidase [EC:3.2.1.52]	Treg_015005
			hexosaminidase [EC:3.2.1.52]	Treg_015078	*
			hexosaminidase [EC:3.2.1.52]	Treg_015334	*
			hexosaminidase [EC:3.2.1.52]	Treg_015335
			hexosaminidase [EC:3.2.1.52]	Treg_015336	*
			hexosaminidase [EC:3.2.1.52]	Treg_015398	*
			hexosaminidase [EC:3.2.1.52]	Treg_015400	*
			hexosaminidase [EC:3.2.1.52]	Treg_015937	*
			hexosaminidase [EC:3.2.1.52]	Treg_015938	*
			hexosaminidase [EC:3.2.1.52]	Treg_016910	*
			hexosaminidase [EC:3.2.1.52]	Treg_017067	*
			hexosaminidase [EC:3.2.1.52]	Treg_017288
			hexosaminidase [EC:3.2.1.52]	Treg_018604
			hexosaminidase [EC:3.2.1.52]	Treg_020191	*
			hexosaminidase [EC:3.2.1.52]	Treg_020246	*
			hexosaminidase [EC:3.2.1.52]	Treg_020390	*
			hexosaminidase [EC:3.2.1.52]	Treg_020391	*
			NK-tumor recognition protein	Treg_020647
Enviromental information processes
KEGG pathways	13	12
signaling molecules and interaction;Cell adhesion molecules (CAMs) (ko04514)	6	5
			integrin alpha 8	Treg_008251
			integrin alpha 8	Treg_011205
			integrin beta 1	Treg_008140
			neural cell adhesion molecule	Treg_007831
			neuroligin	Treg_006996
			syndecan 2	Treg_017641
signaling molecules and interaction;ECM-receptor interaction (ko04512)	10	9
			agrin	Treg_006322
			collagen, type I/II/III/V/XI/XXIV/XXVII, alpha	Treg_007709
			collagen, type VI, alpha	Treg_008130	*
			dystroglycan 1	Treg_009000
			integrin alpha 8	Treg_008251
			integrin alpha 8	Treg_011205
			integrin beta 1	Treg_008140
			laminin, alpha 1/2	Treg_006946
			laminin, beta 1	Treg_006847
			laminin, gamma 1	Treg_007761
KEGG protein class	42	28
cell adhesion molecules and their ligands (ko04516)	42	28
			agrin	Treg_006322
			atrophin-1 interacting protein 3 (BAI1-associated protein 1)	Treg_010335
			collagen, type I/II/III/V/XI/XXIV/XXVII, alpha	Treg_007709
			collagen, type VI, alpha	Treg_008130	*
			connective tissue growth factor	Treg_009114	*
			dystroglycan 1	Treg_009000
			fibroblast growth factor receptor 4 [EC:2.7.10.1]	Treg_012195
			integrin beta 1	Treg_008140
			laminin, beta 1	Treg_006847
			laminin, gamma 1	Treg_007761
			NAD+ nucleosidase [EC:3.2.2.5]	Treg_015233
			netrin 1	Treg_008890
			netrin receptor unc-5	Treg_007882
			netrin receptor unc-5	Treg_007883
			netrin receptor unc-5	Treg_010576
			neural cell adhesion molecule	Treg_007831
			neuroligin	Treg_006996
			nidogen (entactin)	Treg_015099
			protocadherin-16/23	Treg_010310
			protocadherin delta 1	Treg_007488
			protocadherin delta 1	Treg_007682
			protocadherin delta 1	Treg_008430
			protocadherin delta 1	Treg_009117
			protocadherin delta 1	Treg_010241
			protocadherin delta 1	Treg_011072
			protocadherin delta 1	Treg_011262
			protocadherin delta 1	Treg_015119
			protocadherin delta 1	Treg_016103
			protocadherin delta 2	Treg_006314
			protocadherin delta 2	Treg_009028
			protocadherin Fat 1/2/3	Treg_007597
			protocadherin gamma subfamily B	Treg_007024
			receptor-type tyrosine-protein phosphatase delta [EC:3.1.3.48]	Treg_007579
			roundabout, axon guidance receptor 2	Treg_007643
			roundabout, axon guidance receptor 2	Treg_008144
			roundabout, axon guidance receptor 3	Treg_006947
			semaphorin 5	Treg_009454
			semaphorin 5	Treg_010434
			slit 1	Treg_008821
			syndecan 2	Treg_017641
			tyrosine-protein kinase Fyn [EC:2.7.10.2]	Treg_008500
			tyrosine-protein kinase Fyn [EC:2.7.10.2]	Treg_011731
Cellular processes
KEGG pathways	112	46
cellular Processes;Cell growth and death;Cell cycle (ko04110)	29	21
			abelson tyrosine-protein kinase 1 [EC:2.7.10.2]	Treg_016913
			ataxia telangiectasia mutated family protein [EC:2.7.11.1]	Treg_018014	*
			ataxia telangiectasia mutated family protein [EC:2.7.11.1]	Treg_020900
			cell division control protein 7 [EC:2.7.11.1]	Treg_002264
			cell division control protein 7 [EC:2.7.11.1]	Treg_015693
			cell division cycle 20, cofactor of APC complex	Treg_017239
			cyclin B	Treg_009865
			cyclin B	Treg_015526
			DNA replication licensing factor MCM2 [EC:3.6.4.12]	Treg_007137
			DNA replication licensing factor MCM3 [EC:3.6.4.12]	Treg_015138
			DNA replication licensing factor MCM4 [EC:3.6.4.12]	Treg_006757
			DNA replication licensing factor MCM5 [EC:3.6.4.12]	Treg_008919
			DNA replication licensing factor MCM6 [EC:3.6.4.12]	Treg_006901
			mitotic spindle assembly checkpoint protein MAD2	Treg_010081
			origin recognition complex subunit 1	Treg_011779
			origin recognition complex subunit 2	Treg_009033
			origin recognition complex subunit 3	Treg_010221
			polo-like kinase 1 [EC:2.7.11.21]	Treg_008271
			separase [EC:3.4.22.49]	Treg_005158
			separase [EC:3.4.22.49]	Treg_007192
			separase [EC:3.4.22.49]	Treg_007194
			separase [EC:3.4.22.49]	Treg_015602
			serine/threonine-protein kinase ATR [EC:2.7.11.1]	Treg_010199
			serine/threonine-protein kinase Chk1 [EC:2.7.11.1]	Treg_011538
			serine/threonine-protein kinase TTK/MPS1 [EC:2.7.12.1]	Treg_005074	*
			serine/threonine-protein kinase TTK/MPS1 [EC:2.7.12.1]	Treg_007233
			serine/threonine-protein kinase TTK/MPS1 [EC:2.7.12.1]	Treg_015411
			structural maintenance of chromosome 1	Treg_008466
			structural maintenance of chromosome 3 (chondroitin sulfate proteoglycan 6)	Treg_004466
cellular Processes;Cell growth and death;Cell cycle - yeast (ko04111)	27	21
			cell division control protein 7 [EC:2.7.11.1]	Treg_002264
			cell division control protein 7 [EC:2.7.11.1]	Treg_015693
			cell division cycle 20, cofactor of APC complex	Treg_017239
			condensin complex subunit 1	Treg_016106
			condensin complex subunit 3	Treg_008769
			cyclin-dependent kinase regulatory subunit CKS1	Treg_016923
			DNA replication licensing factor MCM2 [EC:3.6.4.12]	Treg_007137
			DNA replication licensing factor MCM3 [EC:3.6.4.12]	Treg_015138
			DNA replication licensing factor MCM4 [EC:3.6.4.12]	Treg_006757
			DNA replication licensing factor MCM5 [EC:3.6.4.12]	Treg_008919
			DNA replication licensing factor MCM6 [EC:3.6.4.12]	Treg_006901
			mitotic spindle assembly checkpoint protein MAD2	Treg_010081
			origin recognition complex subunit 1	Treg_011779
			origin recognition complex subunit 2	Treg_009033
			origin recognition complex subunit 3	Treg_010221
			separase [EC:3.4.22.49]	Treg_005158
			separase [EC:3.4.22.49]	Treg_007192
			separase [EC:3.4.22.49]	Treg_007194
			separase [EC:3.4.22.49]	Treg_015602
			serine/threonine-protein kinase Chk1 [EC:2.7.11.1]	Treg_011538
			serine/threonine-protein kinase TTK/MPS1 [EC:2.7.12.1]	Treg_005074	*
			serine/threonine-protein kinase TTK/MPS1 [EC:2.7.12.1]	Treg_007233
			serine/threonine-protein kinase TTK/MPS1 [EC:2.7.12.1]	Treg_015411
			serine/threonine-protein phosphatase 2A regulatory subunit B	Treg_007912
			structural maintenance of chromosome 1	Treg_008466
			structural maintenance of chromosome 2	Treg_016706
			structural maintenance of chromosome 3 (chondroitin sulfate proteoglycan 6)	Treg_004466
cellular Processes;Transport and catabolism;Lysosome (ko04142)	78	20
			beta-galactosidase [EC:3.2.1.23]	Treg_015412
			beta-galactosidase [EC:3.2.1.23]	Treg_016592
			cathepsin A (carboxypeptidase C) [EC:3.4.16.5]	Treg_006421
			cathepsin A (carboxypeptidase C) [EC:3.4.16.5]	Treg_007404
			cathepsin B [EC:3.4.22.1]	Treg_004279
			cathepsin B [EC:3.4.22.1]	Treg_006318
			cathepsin B [EC:3.4.22.1]	Treg_006320
			cathepsin B [EC:3.4.22.1]	Treg_006625
			cathepsin B [EC:3.4.22.1]	Treg_014534
			cathepsin B [EC:3.4.22.1]	Treg_014792
			cathepsin B [EC:3.4.22.1]	Treg_015294	*
			cathepsin B [EC:3.4.22.1]	Treg_015853	*
			cathepsin B [EC:3.4.22.1]	Treg_018303	*
			cathepsin B [EC:3.4.22.1]	Treg_020247	*
			cathepsin B [EC:3.4.22.1]	Treg_020667
			cathepsin C [EC:3.4.14.1]	Treg_005998
			cathepsin C [EC:3.4.14.1]	Treg_014726
			cathepsin C [EC:3.4.14.1]	Treg_015137
			cathepsin D [EC:3.4.23.5]	Treg_007039	*
			cathepsin D [EC:3.4.23.5]	Treg_007041	*
			cathepsin D [EC:3.4.23.5]	Treg_007274	*
			cathepsin D [EC:3.4.23.5]	Treg_009554
			cathepsin D [EC:3.4.23.5]	Treg_015703
			cathepsin D [EC:3.4.23.5]	Treg_015707
			cathepsin D [EC:3.4.23.5]	Treg_017006	*
			cathepsin D [EC:3.4.23.5]	Treg_018267
			cathepsin F [EC:3.4.22.41]	Treg_008596
			cathepsin K [EC:3.4.22.38]	Treg_006792
			cathepsin L [EC:3.4.22.15]	Treg_006336
			cathepsin L [EC:3.4.22.15]	Treg_006337
			cathepsin S [EC:3.4.22.27]	Treg_012387
			CD63 antigen	Treg_010327
			hexosaminidase [EC:3.2.1.52]	Treg_001840
			hexosaminidase [EC:3.2.1.52]	Treg_006008	*
			hexosaminidase [EC:3.2.1.52]	Treg_006302
			hexosaminidase [EC:3.2.1.52]	Treg_006310
			hexosaminidase [EC:3.2.1.52]	Treg_006640
			hexosaminidase [EC:3.2.1.52]	Treg_007118	*
			hexosaminidase [EC:3.2.1.52]	Treg_008394	*
			hexosaminidase [EC:3.2.1.52]	Treg_008735
			hexosaminidase [EC:3.2.1.52]	Treg_009625	*
			hexosaminidase [EC:3.2.1.52]	Treg_009837	*
			hexosaminidase [EC:3.2.1.52]	Treg_011272	*
			hexosaminidase [EC:3.2.1.52]	Treg_013277	*
			hexosaminidase [EC:3.2.1.52]	Treg_014789
			hexosaminidase [EC:3.2.1.52]	Treg_015005
			hexosaminidase [EC:3.2.1.52]	Treg_015078	*
			hexosaminidase [EC:3.2.1.52]	Treg_015334	*
			hexosaminidase [EC:3.2.1.52]	Treg_015335
			hexosaminidase [EC:3.2.1.52]	Treg_015336	*
			hexosaminidase [EC:3.2.1.52]	Treg_015398	*
			hexosaminidase [EC:3.2.1.52]	Treg_015400	*
			hexosaminidase [EC:3.2.1.52]	Treg_015937	*
			hexosaminidase [EC:3.2.1.52]	Treg_015938	*
			hexosaminidase [EC:3.2.1.52]	Treg_016910	*
			hexosaminidase [EC:3.2.1.52]	Treg_017067	*
			hexosaminidase [EC:3.2.1.52]	Treg_017288
			hexosaminidase [EC:3.2.1.52]	Treg_018604
			hexosaminidase [EC:3.2.1.52]	Treg_020191	*
			hexosaminidase [EC:3.2.1.52]	Treg_020246	*
			hexosaminidase [EC:3.2.1.52]	Treg_020390	*
			hexosaminidase [EC:3.2.1.52]	Treg_020391	*
			legumain [EC:3.4.22.34]	Treg_006584	*
			legumain [EC:3.4.22.34]	Treg_008970	*
			legumain [EC:3.4.22.34]	Treg_015036
			lysophospholipase III [EC:3.1.1.5]	Treg_006464
			lysophospholipase III [EC:3.1.1.5]	Treg_007259
			lysophospholipase III [EC:3.1.1.5]	Treg_011040	*
			lysophospholipase III [EC:3.1.1.5]	Treg_017620	*
			lysosomal-associated membrane protein 1/2	Treg_006446
			lysosome membrane protein 2	Treg_015607
			lysosome membrane protein 2	Treg_016110
			lysosome membrane protein 2	Treg_017508
			N4-(beta-N-acetylglucosaminyl)-L-asparaginase [EC:3.5.1.26]	Treg_017190
			Niemann-Pick C2 protein	Treg_008217
			palmitoyl-protein thioesterase [EC:3.1.2.22]	Treg_016072
			saposin	Treg_014802
			sortilin	Treg_015784
Summary of enriched transcripts of schistosomula stage of Trichobilharzia regenti assigned to biological processes categories of gene ontology (GO)
Proteolysis	215
carbohydrate metabolic process (GO:0005975); cellular protein modification process (GO:0006464); DNA replication initiation (GO:0006270); DNA-dependent DNA replication (GO:0006261); protein processing (GO:0016485); protein maturation (GO:0051604); proteolysis (GO:0006508)
Cell adhesion	105
cell adhesion (GO:0007155); cell cycle (GO:0007049); cell cycle process (GO:0022402); cell-cell adhesion (GO:0016337); cellular component movement (GO:0006928); cell division (GO:0051301); chromosome condensation (GO:0030261); chromosome segregation (GO:0007059); cytokinesis (GO:0000910); homophilic cell adhesion (GO:0007156); M phase (GO:0000279); microtubule-based process (GO:0007017); mitotic …
Biological adhesion	37
biological adhesion (GO:0022610)
Multicellular organismal process	15
multicellular organismal process (GO:0032501)
Developmental process	20
developmental process (GO:0032502)
